# Supplementary material for: Proteomic Profiling of Ex Vivo Expanded CD34-Positive Haematopoetic Cells Derived from Umbilical Cord Blood
Source: Stem Cells Int. 2013 Mar 26;2013:245695. doi: 10.1155/2013/245695 (PMC3622389; doi:10.1155/2013/245695)
Supplement: Supplementary file 1 — Supplemental table 1: List of quantified proteins with expression profiles from day 0 to day 7. Supplemental table 2: List of all identified proteins, peptides, peptides with modification, label free quantification values. Supplemental figure 1: Expansion of total cells, CD34+-cells and CFC in a preliminary experiment. Supplemental figure 2: Validation of protein quantification values via flow cytometry (FCM). [file 245695.f1.xlsx]

## Sheet: Overview
		Table	Description
		Summary	Generell parameters of the RAW-files (number of spectra, identified spectra, peptides…)
		ident Proteins	All identified proteins with the number of peptides, GO-annotation, log2-label free intensity values (LFQ)
		ident Peptides	All identified peptides with score and intensity
		Oxidation(M) Sites	All modified peptides (Oxidation (M))
		quant Proteins	All quantified proteins with detailed expression vaules (LFQ) and significant variations
		Foldchanges	proteins with detailed GO-annotation and fold changes between d0/d3, d3/d7 and d0/d7.
		Parameter	Search parameters used for Proteinidentification and Proteinquantification
		Further insight into the RAW-datafiles can be provided on request.

## Sheet: Summary
Experiment	Patient	Timepoint	Raw file	Instrument	Tune file	Protease	Protease first search	Use protease first search	Fixed modifications	Variable modifications	Variable modifications first search	Use variable modifications first search	Multiplicity	Max. missed cleavages	Labels0	LC-MS run type	Time-dependent recalibration	MS	MS/MS	MS/MS Submitted	MS/MS Submitted (SIL)	MS/MS Submitted (ISO)	MS/MS Submitted (PEAK)	MS/MS on Polymers	MS/MS Identified	MS/MS Identified (SIL)	MS/MS Identified (ISO)	MS/MS Identified (PEAK)	MS/MS Identified [%]	MS/MS Identified (SIL) [%]	MS/MS Identified (ISO) [%]	MS/MS Identified (PEAK) [%]	Peptide Sequences Identified	Peaks	Peaks Sequenced	Peaks Sequenced [%]	Peaks Repeatedly Sequenced	Peaks Repeatedly Sequenced [%]	Isotope Patterns	Isotope Patterns Sequenced	Isotope Patterns Sequenced (z>1)	Isotope Patterns Sequenced [%]	Isotope Patterns Sequenced (z>1) [%]	Isotope Patterns Repeatedly Sequenced	Isotope Patterns Repeatedly Sequenced [%]	Recalibrated	Av. Absolute Mass Deviation	Mass Standard Deviation	Label free norm param
1d0	1	d0	OE01509		ts_nano	Trypsin/P		False		Oxidation (M);Acetyl (Protein N-term)	Oxidation (M);Acetyl (Protein N-term)	False	1	2		Standard		2142	29347	34252	24440	0	9812	0	10358	9831	0	527	30.24	40.23	NaN	5.37	7541	174160	23803	13.67	2552	10.72	39611	19474	19273	49.16	51.13	3348	17.19	+	0.58589	0.83072
1d3	1	d3	OE01511		ts_nano	Trypsin/P		False		Oxidation (M);Acetyl (Protein N-term)	Oxidation (M);Acetyl (Protein N-term)	False	1	2		Standard		2254	30800	35290	26309	1	8980	0	11773	11274	0	499	33.36	42.85	0	5.56	8834	197661	25874	13.09	2457	9.5	46310	21702	21518	46.86	48.6	3401	15.67	+	0.57647	0.81511
1d7	1	d7	OE01515		ts_nano	Trypsin/P		False		Oxidation (M);Acetyl (Protein N-term)	Oxidation (M);Acetyl (Protein N-term)	False	1	2		Standard		2175	29859	34276	25441	1	8834	0	12899	12387	0	512	37.63	48.69	0	5.8	9694	194982	25152	12.9	2333	9.28	45486	21166	21017	46.53	48.17	3153	14.9	+	0.5787	0.83025
2d0	2	d0	OE01517		ts_nano	Trypsin/P		False		Oxidation (M);Acetyl (Protein N-term)	Oxidation (M);Acetyl (Protein N-term)	False	1	2		Standard		2210	29648	34304	24990	0	9314	0	9697	9272	0	425	28.27	37.1	NaN	4.56	7290	180476	24330	13.48	2434	10	42111	20332	20135	48.28	50.3	3292	16.19	+	0.60983	0.85327
2d3	2	d3	OE01519		ts_nano	Trypsin/P		False		Oxidation (M);Acetyl (Protein N-term)	Oxidation (M);Acetyl (Protein N-term)	False	1	2		Standard		2201	29278	33666	24886	4	8776	0	10940	10503	0	437	32.5	42.2	0	4.98	8356	189827	24492	12.9	2283	9.32	44411	20688	20526	46.58	48.43	3067	14.83	+	0.60741	0.85509
2d7	2	d7	OE01523		ts_nano	Trypsin/P		False		Oxidation (M);Acetyl (Protein N-term)	Oxidation (M);Acetyl (Protein N-term)	False	1	2		Standard		2229	29077	33359	24794	1	8564	0	10835	10368	0	467	32.48	41.82	0	5.45	8411	193393	24623	12.73	2128	8.64	45401	20871	20717	45.97	47.77	2942	14.1	+	0.60916	0.84516
17d0A	17	d0	OE01525		ts_nano	Trypsin/P		False		Oxidation (M);Acetyl (Protein N-term)	Oxidation (M);Acetyl (Protein N-term)	False	1	2		Standard		2270	28653	33209	24096	1	9112	0	10615	10135	0	480	31.96	42.06	0	5.27	8065	182350	23664	12.98	2408	10.18	42027	19722	19579	46.93	48.97	3192	16.18	+	0.5825	0.82627
17d3	17	d3	OE01531		ts_nano	Trypsin/P		False		Oxidation (M);Acetyl (Protein N-term)	Oxidation (M);Acetyl (Protein N-term)	False	1	2		Standard		2895	35845	39859	31826	5	8028	0	12897	12354	0	543	32.36	38.82	0	6.76	10189	260605	31026	11.91	3140	10.12	57523	26126	25897	45.42	47.44	4382	16.77	+	0.62519	0.88165
17d7-1	17	d7	OE01533		ts_nano	Trypsin/P		False		Oxidation (M);Acetyl (Protein N-term)	Oxidation (M);Acetyl (Protein N-term)	False	1	2		Standard		2890	36433	40373	32492	1	7880	0	14129	13690	0	439	35	42.13	0	5.57	10439	257928	30449	11.81	3834	12.59	56724	25188	24932	44.4	46.43	5004	19.87	+	0.61477	0.86881
17d0B	17	d0	OE01535		ts_nano	Trypsin/P		False		Oxidation (M);Acetyl (Protein N-term)	Oxidation (M);Acetyl (Protein N-term)	False	1	2		Standard		2698	30904	35559	26246	3	9310	0	8239	7710	0	529	23.17	29.38	0	5.68	6488	205723	25351	12.32	2976	11.74	42544	20378	20151	47.9	50.22	3845	18.87	+	0.61726	0.85451
17d7-2	17	d7	OE01537		ts_nano	Trypsin/P		False		Oxidation (M);Acetyl (Protein N-term)	Oxidation (M);Acetyl (Protein N-term)	False	1	2		Standard		2725	33113	37053	29172	1	7880	0	12729	12232	0	497	34.35	41.93	0	6.31	10169	242587	28736	11.85	2788	9.7	53805	24096	23851	44.78	46.85	3905	16.21	+	0.59865	0.8551
Total																		26689	342957	391200	294692	18	96490	0	125111	119756	0	5355	351.32	447.21	0	61.31	95476	2279692					515953	239743	237596	512.81	534.31	39531	16.43		0.60053	0.846904

## Sheet: ident Proteins
Gene names	Proteins	KEGG name	Uniprot Keywords	GOBP name	GOMF name	GOCC name	Peptides	Razor + unique peptides	Unique peptides	Peptides 17d0A	Peptides 17d3	Peptides 17d7-1	Peptides 1d0	Peptides 1d3	Peptides 1d7	Peptides 2d0	Peptides 2d3	Peptides 2d7	Sequence coverage [%]	Mol. weight [kDa]	Protein IDs	Majority protein IDs	Protein names	LFQ intensity 17d0A	LFQ intensity 17d3	LFQ intensity 17d7-1	LFQ intensity 1d0	LFQ intensity 1d3	LFQ intensity 1d7	LFQ intensity 2d0	LFQ intensity 2d3	LFQ intensity 2d7
A1BG	3		Alternativesplicing;Completeproteome;Directproteinsequencing;Disulfidebond;Glycoprotein;Immunoglobulindomain;Polymorphism;Referenceproteome;Repeat;Secreted;Signal			extracellular region	10	9	9	2	1	3	5	4	0	5	3	1	29.3	54.253	P04217;P04217-2;B3KWB5	P04217;P04217-2	Alpha-1B-glycoprotein	NaN	NaN	19.2508	23.6417	20.4536	NaN	25.7639	20.2819	NaN
AAAS	5	RNA transport	Completeproteome;Diseasemutation;Phosphoprotein;Referenceproteome;Repeat;WDrepeat	biological regulation;carbohydrate metabolic process;carbohydrate transport;cell surface receptor linked signaling pathway;cellular process;cellular response to chemical stimulus;cellular response to cytokine stimulus;cellular response to organic substance;cellular response to stimulus;cytokine-mediated signaling pathway;establishment of localization;establishment of localization in cell;glucose …		cell part;centrosome;cytoplasmic part;cytoskeletal part;intracellular non-membrane-bounded organelle;intracellular organelle;intracellular organelle part;intracellular part;macromolecular complex;membrane;membrane part;microtubule organizing center;non-membrane-bounded organelle;nuclear membrane;nuclear part;nuclear pore;organelle;organelle membrane;organelle part;pore complex;protein complex	8	8	8	2	5	6	3	4	2	1	3	3	20.7	59.573	Q9NRG9;F8VZ44;Q9NRG9-2;H3BU82;F8VUB6	Q9NRG9;F8VZ44;Q9NRG9-2;H3BU82	Aladin	21.5575	21.995	21.6201	21.0804	21.906	21.6369	NaN	21.7865	22.362
AAK1	3		Alternativesplicing;ATP-binding;Cellmembrane;Coatedpit;Completeproteome;Endocytosis;Kinase;Membrane;Nucleotide-binding;Phosphoprotein;Polymorphism;Referenceproteome;Serine/threonine-proteinkinase;Transferase	biological regulation;cellular component organization;cellular component organization or biogenesis;cellular macromolecule metabolic process;cellular membrane organization;cellular metabolic process;cellular process;cellular protein metabolic process;endocytosis;establishment of localization;macromolecule metabolic process;macromolecule modification;membrane invagination;membrane organization;met…	adenyl nucleotide binding;adenyl ribonucleotide binding;AP-2 adaptor complex binding;ATP binding;binding;catalytic activity;kinase activity;Notch binding;nucleotide binding;phosphotransferase activity, alcohol group as acceptor;protein binding;protein complex binding;protein kinase activity;protein serine/threonine kinase activity;purine nucleotide binding;purine ribonucleoside triphosphate bindi…	axon part;cell leading edge;cell part;cell projection part;clathrin-coated vesicle;coated pit;coated vesicle;cytoplasmic membrane-bounded vesicle;cytoplasmic part;cytoplasmic vesicle;extrinsic to membrane;extrinsic to plasma membrane;intracellular membrane-bounded organelle;intracellular organelle;intracellular part;membrane part;membrane-bounded organelle;membrane-bounded vesicle;organelle;plasm…	3	3	3	2	3	3	1	2	2	0	1	2	4.4	103.88	Q2M2I8;Q2M2I8-2;E9PG46	Q2M2I8;Q2M2I8-2;E9PG46	AP2-associated protein kinase 1	19.6606	19.4572	20.5113	NaN	18.6764	19.0985	NaN	NaN	19.6247
AARS	5	Aminoacyl-tRNA biosynthesis	Acetylation;Aminoacyl-tRNAsynthetase;ATP-binding;Charcot-Marie-Toothdisease;Completeproteome;Cytoplasm;Directproteinsequencing;Diseasemutation;Ligase;Metal-binding;Neuropathy;Nucleotide-binding;Phosphoprotein;Polymorphism;Proteinbiosynthesis;Referenceproteome;RNA-binding;tRNA-binding;Ublconjugation;Zinc	alanyl-tRNA aminoacylation;amine metabolic process;amino acid activation;carboxylic acid metabolic process;cellular amine metabolic process;cellular amino acid metabolic process;cellular ketone metabolic process;cellular macromolecule metabolic process;cellular metabolic process;cellular nitrogen compound metabolic process;cellular process;macromolecule metabolic process;metabolic process;ncRNA m…	adenyl nucleotide binding;adenyl ribonucleotide binding;alanine-tRNA ligase activity;aminoacyl-tRNA ligase activity;ATP binding;binding;catalytic activity;cation binding;ion binding;ligase activity;ligase activity, forming aminoacyl-tRNA and related compounds;ligase activity, forming carbon-oxygen bonds;metal ion binding;nucleic acid binding;nucleotide binding;purine nucleotide binding;purine rib…	cell fraction;cell part;cytoplasmic part;cytosol;intracellular part;soluble fraction	24	24	24	9	18	17	12	14	14	10	9	13	34	109.32	E7ETK8;P49588;H3BPK7;H3BRC8;H3BSV2	E7ETK8;P49588	Alanine--tRNA ligase, cytoplasmic	24.1989	25.0078	24.948	23.8417	24.7434	24.45	23.6309	24.7656	24.9462
AARS2	1	Aminoacyl-tRNA biosynthesis	Aminoacyl-tRNAsynthetase;ATP-binding;Completeproteome;Diseasemutation;Ligase;Metal-binding;Mitochondrion;Nucleotide-binding;Polymorphism;Proteinbiosynthesis;Referenceproteome;RNA-binding;Transitpeptide;tRNA-binding;Zinc	alanyl-tRNA aminoacylation;amine metabolic process;amino acid activation;carboxylic acid metabolic process;cellular amine metabolic process;cellular amino acid metabolic process;cellular ketone metabolic process;cellular macromolecule metabolic process;cellular metabolic process;cellular nitrogen compound metabolic process;cellular process;macromolecule metabolic process;metabolic process;ncRNA m…	adenyl nucleotide binding;adenyl ribonucleotide binding;alanine-tRNA ligase activity;aminoacyl-tRNA ligase activity;ATP binding;binding;catalytic activity;cation binding;ion binding;ligase activity;ligase activity, forming aminoacyl-tRNA and related compounds;ligase activity, forming carbon-oxygen bonds;metal ion binding;nucleic acid binding;nucleotide binding;purine nucleotide binding;purine rib…	cell part;cytoplasmic part;intracellular membrane-bounded organelle;intracellular organelle;intracellular part;membrane-bounded organelle;mitochondrion;organelle	10	10	10	5	7	6	6	2	4	5	5	4	12.3	107.34	Q5JTZ9	Q5JTZ9	Alanine--tRNA ligase, mitochondrial	19.8543	21.0962	20.82	20.9243	20.4547	20.8627	20.2492	20.1535	19.6056
AARSD1	9		Alternativesplicing;Completeproteome;Cytoplasm;Metal-binding;Phosphoprotein;Proteinbiosynthesis;Referenceproteome;Zinc	alanyl-tRNA aminoacylation;amine metabolic process;amino acid activation;carboxylic acid metabolic process;cellular amine metabolic process;cellular amino acid metabolic process;cellular ketone metabolic process;cellular macromolecule metabolic process;cellular metabolic process;cellular nitrogen compound metabolic process;cellular process;macromolecule metabolic process;metabolic process;ncRNA m…	adenyl nucleotide binding;adenyl ribonucleotide binding;alanine-tRNA ligase activity;aminoacyl-tRNA ligase activity;ATP binding;binding;catalytic activity;cation binding;ion binding;ligase activity;ligase activity, forming aminoacyl-tRNA and related compounds;ligase activity, forming carbon-oxygen bonds;metal ion binding;nucleic acid binding;nucleotide binding;purine nucleotide binding;purine rib…	cell part;cytoplasm;intracellular part	6	6	6	3	4	3	3	6	4	2	4	4	15.5	65.701	Q9BTE6-3;Q9BTE6-2;C9J5N1;Q9BTE6;H7C1W7;H7C1K1;H7BZ25;H7C054;H7C0F3	Q9BTE6-3;Q9BTE6-2;C9J5N1;Q9BTE6;H7C1W7;H7C1K1	Alanyl-tRNA editing protein Aarsd1	21.2975	21.7865	21.2114	21.1185	21.7536	20.8605	20.8424	21.9505	21.0865
AASDHPPT	4	Pantothenate and CoA biosynthesis	3D-structure;Completeproteome;Cytoplasm;Directproteinsequencing;Magnesium;Metal-binding;Phosphoprotein;Referenceproteome;Transferase	amine metabolic process;biosynthetic process;carboxylic acid biosynthetic process;carboxylic acid metabolic process;cellular amine metabolic process;cellular amino acid metabolic process;cellular biosynthetic process;cellular ketone metabolic process;cellular lipid metabolic process;cellular metabolic process;cellular modified amino acid metabolic process;cellular nitrogen compound metabolic proc…	binding;catalytic activity;cation binding;holo-[acyl-carrier-protein] synthase activity;ion binding;magnesium ion binding;metal ion binding;phosphotransferase activity, for other substituted phosphate groups;protein binding;transferase activity;transferase activity, transferring phosphorus-containing groups	cell part;cytoplasmic part;cytosol;intracellular part	3	3	3	1	2	3	1	3	2	1	2	2	10.7	35.776	Q9NRN7;B4DDW7;E9PLW6;E9PNF3	Q9NRN7;B4DDW7	L-aminoadipate-semialdehyde dehydrogenase-phosphopantetheinyl transferase	NaN	19.526	19.5246	NaN	19.7257	NaN	NaN	19.8332	19.787
AATF	1		Acetylation;Completeproteome;Nucleus;Phosphoprotein;Referenceproteome	anti-apoptosis;apoptosis;biological regulation;cell death;cell surface receptor linked signaling pathway;cellular process;cellular response to stimulus;cellular response to stress;death;enzyme linked receptor protein signaling pathway;induction of apoptosis;induction of apoptosis by extracellular signals;induction of programmed cell death;negative regulation of apoptosis;negative regulation of bi…	binding;leucine zipper domain binding;LRR domain binding;nucleic acid binding transcription factor activity;protein binding;protein domain specific binding;sequence-specific DNA binding transcription factor activity	adherens junction;anchoring junction;cell junction;cell part;cell-substrate adherens junction;cell-substrate junction;centrosome;cytoplasmic part;cytoskeletal part;focal adhesion;intracellular non-membrane-bounded organelle;intracellular organelle;intracellular organelle part;intracellular part;microtubule organizing center;non-membrane-bounded organelle;nuclear part;nucleolus;organelle;organelle…	6	6	6	1	4	3	0	3	2	1	2	3	16.4	63.132	Q9NY61	Q9NY61	Protein AATF	NaN	20.3189	20.1383	NaN	20.9392	20.034	NaN	21.3599	20.5082
ABCB10	1	ABC transporters	3D-structure;Acetylation;ATP-binding;Completeproteome;Membrane;Mitochondrion;Mitochondrioninnermembrane;Nucleotide-binding;Polymorphism;Referenceproteome;Transitpeptide;Transmembrane;Transmembranehelix;Transport		active transmembrane transporter activity;adenyl nucleotide binding;adenyl ribonucleotide binding;ATP binding;ATPase activity;ATPase activity, coupled;ATPase activity, coupled to movement of substances;ATPase activity, coupled to transmembrane movement of substances;binding;catalytic activity;hydrolase activity;hydrolase activity, acting on acid anhydrides;hydrolase activity, acting on acid anhyd…	cell part;cytoplasmic part;integral to membrane;integral to mitochondrial membrane;integral to organelle membrane;intracellular organelle part;intracellular part;intrinsic to membrane;intrinsic to organelle membrane;membrane;membrane part;mitochondrial inner membrane;mitochondrial membrane;mitochondrial membrane part;mitochondrial part;organelle inner membrane;organelle membrane;organelle part	2	2	2	0	0	0	0	0	2	0	0	1	5	79.147	Q9NRK6	Q9NRK6	ATP-binding cassette sub-family B member 10, mitochondrial	NaN	NaN	NaN	NaN	NaN	19.9389	NaN	NaN	NaN
ABCD3	5	ABC transporters;Peroxisome	Acetylation;Alternativesplicing;ATP-binding;Completeproteome;Glycoprotein;Membrane;Nucleotide-binding;Peroxisome;Phosphoprotein;Polymorphism;Referenceproteome;Transmembrane;Transmembranehelix;Transport	carboxylic acid transport;cellular component organization;cellular component organization at cellular level;cellular component organization or biogenesis;cellular component organization or biogenesis at cellular level;cellular process;establishment of localization;fatty acid transport;lipid transport;long-chain fatty acid transport;monocarboxylic acid transport;organelle organization;organic acid…	active transmembrane transporter activity;adenyl nucleotide binding;adenyl ribonucleotide binding;ATP binding;ATPase activity;ATPase activity, coupled;ATPase activity, coupled to movement of substances;ATPase activity, coupled to transmembrane movement of substances;binding;catalytic activity;hydrolase activity;hydrolase activity, acting on acid anhydrides;hydrolase activity, acting on acid anhyd…	cell part;cytoplasmic part;cytosol;integral to membrane;integral to organelle membrane;integral to peroxisomal membrane;intracellular membrane-bounded organelle;intracellular organelle;intracellular organelle part;intracellular part;intrinsic to membrane;intrinsic to organelle membrane;intrinsic to peroxisomal membrane;membrane part;membrane-bounded organelle;microbody part;organelle;organelle pa…	2	2	2	1	1	2	0	2	1	0	2	1	3.2	78.401	E7EUE1;P28288;F5GYC1;P28288-2;P28288-3	E7EUE1;P28288;F5GYC1;P28288-2;P28288-3	ATP-binding cassette sub-family D member 3	NaN	NaN	19.3559	NaN	19.8103	NaN	NaN	19.376	NaN
ABCE1	4		4Fe-4S;Acetylation;ATP-binding;Chaperone;Completeproteome;Cytoplasm;Host-virusinteraction;Iron;Iron-sulfur;Metal-binding;Mitochondrion;Nucleotide-binding;Referenceproteome;Repeat	catabolic process;cellular catabolic process;cellular macromolecule catabolic process;cellular macromolecule metabolic process;cellular metabolic process;cellular nitrogen compound metabolic process;cellular process;interspecies interaction between organisms;macromolecule catabolic process;macromolecule metabolic process;metabolic process;multi-organism process;nitrogen compound metabolic process…	4 iron, 4 sulfur cluster binding;adenyl nucleotide binding;adenyl ribonucleotide binding;ATP binding;ATPase activity;binding;catalytic activity;cation binding;electron carrier activity;enzyme inhibitor activity;enzyme regulator activity;hydrolase activity;hydrolase activity, acting on acid anhydrides;hydrolase activity, acting on acid anhydrides, in phosphorus-containing anhydrides;ion binding;ir…	cell part;cytoplasmic part;intracellular membrane-bounded organelle;intracellular organelle;intracellular part;membrane-bounded organelle;mitochondrion;organelle	13	13	13	6	10	11	8	9	8	6	9	8	26	67.314	P61221;D6R9I9;D6RGF4;H0Y990	P61221;D6R9I9	ATP-binding cassette sub-family E member 1	23.3006	23.0533	23.3038	22.454	23.3479	23.4606	22.2836	23.5784	23.0474
ABCF1	7		Activator;Alternativesplicing;ATP-binding;Completeproteome;Cytoplasm;Isopeptidebond;Nucleotide-binding;Nucleus;Phosphoprotein;Polymorphism;Referenceproteome;Repeat;Ublconjugation	cellular process;defense response;inflammatory response;response to stimulus;response to stress;response to wounding;translational initiation	adenyl nucleotide binding;adenyl ribonucleotide binding;ATP binding;ATPase activity;binding;catalytic activity;hydrolase activity;hydrolase activity, acting on acid anhydrides;hydrolase activity, acting on acid anhydrides, in phosphorus-containing anhydrides;nucleic acid binding;nucleoside-triphosphatase activity;nucleotide binding;protein binding;purine nucleotide binding;purine ribonucleoside t…	cell part;cytoplasmic part;envelope;intracellular non-membrane-bounded organelle;intracellular organelle;intracellular organelle part;intracellular part;macromolecular complex;non-membrane-bounded organelle;nuclear envelope;nuclear part;nucleoplasm;organelle;organelle envelope;organelle part;polysomal ribosome;ribonucleoprotein complex;ribosome	8	8	8	2	4	6	1	6	6	2	3	3	12.1	95.925	Q8NE71;Q8NE71-2;H0YGW7;E9PC67;F8VQZ0;Q5STZ7;Q5STZ8	Q8NE71;Q8NE71-2;H0YGW7	ATP-binding cassette sub-family F member 1	19.8255	20.7047	20.2075	NaN	21.2615	20.9855	20.2559	20.7967	20.6211
ABCF3	2		Alternativesplicing;ATP-binding;Completeproteome;Nucleotide-binding;Phosphoprotein;Polymorphism;Referenceproteome;Repeat		adenyl nucleotide binding;adenyl ribonucleotide binding;ATP binding;ATPase activity;binding;catalytic activity;hydrolase activity;hydrolase activity, acting on acid anhydrides;hydrolase activity, acting on acid anhydrides, in phosphorus-containing anhydrides;nucleoside-triphosphatase activity;nucleotide binding;purine nucleotide binding;purine ribonucleoside triphosphate binding;purine ribonucleo…		9	9	9	3	6	7	3	4	4	1	3	3	16.2	79.744	Q9NUQ8;Q9NUQ8-2	Q9NUQ8;Q9NUQ8-2	ATP-binding cassette sub-family F member 3	20.3847	21.307	20.7368	18.9544	20.9777	20.107	NaN	20.6601	20.6742
ABHD10	3		Completeproteome;Hydrolase;Mitochondrion;Polymorphism;Protease;Referenceproteome;Serineprotease;Transitpeptide	macromolecule metabolic process;metabolic process;primary metabolic process;protein metabolic process;proteolysis	catalytic activity;hydrolase activity;peptidase activity;peptidase activity, acting on L-amino acid peptides;serine hydrolase activity;serine-type peptidase activity	cell part;cytoplasmic part;intracellular membrane-bounded organelle;intracellular organelle;intracellular part;membrane-bounded organelle;mitochondrion;organelle	5	5	5	4	4	3	4	4	4	4	3	4	23.5	33.932	Q9NUJ1;B7Z6A8;C9IZX5	Q9NUJ1;B7Z6A8	Abhydrolase domain-containing protein 10, mitochondrial	22.3376	21.9589	22.2605	22.5717	21.8103	22.4701	23.0963	21.5381	22.7852
ABHD11	3		Acetylation;Alternativesplicing;Completeproteome;Hydrolase;Referenceproteome;Williams-Beurensyndrome		catalytic activity;hydrolase activity		2	2	2	1	1	2	1	0	2	2	0	2	7	34.69	Q8NFV4;Q8NFV4-4;H7BYM8	Q8NFV4;Q8NFV4-4;H7BYM8	Abhydrolase domain-containing protein 11	NaN	NaN	18.5988	NaN	NaN	18.4841	20.2929	NaN	19.8451
ABHD14B	5		3D-structure;Acetylation;Alternativesplicing;Completeproteome;Cytoplasm;Hydrolase;Nucleus;Referenceproteome		catalytic activity;hydrolase activity	cell part;cytoplasm;intracellular non-membrane-bounded organelle;intracellular organelle;intracellular organelle part;intracellular part;non-membrane-bounded organelle;nuclear part;nucleolus;organelle;organelle part	5	5	5	3	5	3	4	4	4	2	3	4	32.9	22.345	Q96IU4;B4DNR3;F8W9U3;B4DQI4;Q96IU4-2	Q96IU4;B4DNR3;F8W9U3;B4DQI4	Abhydrolase domain-containing protein 14B	22.6551	22.0002	21.5748	23.273	21.8351	22.0345	23.2317	20.7898	21.0457
ABI1	25	Regulation of actin cytoskeleton	3D-structure;Acetylation;Alternativesplicing;Celljunction;Cellprojection;Chromosomalrearrangement;Coiledcoil;Completeproteome;Cytoplasm;Cytoskeleton;Directproteinsequencing;Nucleus;Phosphoprotein;Polymorphism;Referenceproteome;SH3domain;Synapse;Synaptosome	actin cytoskeleton organization;actin filament organization;actin filament-based process;actin polymerization or depolymerization;biological regulation;cell migration;cell motility;cell surface receptor linked signaling pathway;cellular component movement;cellular component organization;cellular component organization at cellular level;cellular component organization or biogenesis;cellular compon…	binding;binding, bridging;cytoskeletal adaptor activity;cytoskeletal protein binding;DNA binding;enzyme binding;kinase binding;nucleic acid binding;proline-rich region binding;protein binding;protein binding, bridging;protein domain specific binding;SH3 domain binding;ubiquitin protein ligase binding	cell fraction;cell junction;cell part;cell projection;cell projection part;cytoplasm;cytoplasmic part;cytoskeleton;cytosol;endoplasmic reticulum;filopodium;growth cone;insoluble fraction;intracellular membrane-bounded organelle;intracellular non-membrane-bounded organelle;intracellular organelle;intracellular part;lamellipodium;membrane fraction;membrane-bounded organelle;non-membrane-bounded org…	5	5	5	2	3	2	2	1	0	5	2	3	12.6	55.259	A6NFN2;Q8IZP0;H7BXI6;F8WA56;Q8IZP0-9;Q8IZP0-6;Q8IZP0-5;Q8IZP0-3;Q8IZP0-4;Q8IZP0-2;F8WA55;Q8IZP0-7;F5H1G9;Q8IZP0-8;Q8IZP0-10;Q8IZP0-11;Q9NYB9;Q9NYB9-4;E7EP65;E7EW77;Q9NYB9-2;E9PEZ7;Q9NYB9-3;F8WAL6;H0Y6B5	A6NFN2;Q8IZP0;H7BXI6;F8WA56;Q8IZP0-9;Q8IZP0-6;Q8IZP0-5;Q8IZP0-3;Q8IZP0-4;Q8IZP0-2;F8WA55;Q8IZP0-7;F5H1G9;Q8IZP0-8;Q8IZP0-10;Q8IZP0-11	Abl interactor 1	22.0902	21.5347	NaN	21.5154	NaN	NaN	21.5095	20.8686	20.9547
ABI3	2		Alternativesplicing;Coiledcoil;Completeproteome;Cytoplasm;Phosphoprotein;Polymorphism;Referenceproteome;SH3domain	biological regulation;cellular component movement;cellular process;regulation of biological process;regulation of cell migration;regulation of cell motility;regulation of cellular component movement;regulation of cellular process;regulation of localization;regulation of locomotion	binding;protein binding	cell part;cell projection;cytoplasm;intracellular part;lamellipodium	3	3	3	1	3	2	0	1	1	1	1	2	10.9	39.035	Q9P2A4;Q9P2A4-2	Q9P2A4;Q9P2A4-2	ABI gene family member 3	NaN	20.1876	NaN	NaN	NaN	NaN	NaN	NaN	NaN
ABLIM1	18	Axon guidance	Actin-binding;Alternativesplicing;Coiledcoil;Completeproteome;Cytoplasm;Cytoskeleton;LIMdomain;Metal-binding;Phosphoprotein;Polymorphism;Referenceproteome;Repeat;Zinc	anatomical structure morphogenesis;axon guidance;cellular component organization;cellular component organization at cellular level;cellular component organization or biogenesis;cellular component organization or biogenesis at cellular level;cellular process;chemotaxis;cytoskeleton organization;developmental process;locomotion;multicellular organismal process;neurological system process;organ morp…	actin binding;binding;cation binding;cytoskeletal protein binding;ion binding;metal ion binding;protein binding;transition metal ion binding;zinc ion binding	actin cytoskeleton;cell part;cytoplasm;cytoskeleton;intracellular non-membrane-bounded organelle;intracellular organelle;intracellular part;non-membrane-bounded organelle;organelle	3	3	3	3	1	0	2	2	1	2	1	0	6.6	84.356	A6NKJ2;F8W8M4;O14639-2;A6NCD9;Q5T6N4;O14639;A6NDU2;C9K0X4;F8WAB0;Q5T6N2;H0Y3K7;Q5JVV3;O14639-5;O14639-3;O14639-4;F8WAB1;F6XFR5;H0Y7N6	A6NKJ2;F8W8M4;O14639-2;A6NCD9;Q5T6N4;O14639;A6NDU2;C9K0X4;F8WAB0;Q5T6N2;H0Y3K7;Q5JVV3;O14639-5;O14639-3;O14639-4	Actin-binding LIM protein 1	NaN	NaN	NaN	22.1045	NaN	NaN	NaN	NaN	NaN
ABR	6		Alternativesplicing;Completeproteome;GTPaseactivation;Guanine-nucleotidereleasingfactor;Polymorphism;Referenceproteome	apoptosis;biological regulation;cell death;cell surface receptor linked signaling pathway;cellular process;cellular response to stimulus;death;enzyme linked receptor protein signaling pathway;induction of apoptosis;induction of apoptosis by extracellular signals;induction of programmed cell death;intracellular signal transduction;nerve growth factor receptor signaling pathway;positive regulation …	enzyme activator activity;enzyme regulator activity;GTPase activator activity;GTPase regulator activity;guanyl-nucleotide exchange factor activity;nucleoside-triphosphatase regulator activity;Ras guanyl-nucleotide exchange factor activity;Rho guanyl-nucleotide exchange factor activity;small GTPase regulator activity	cell part;cytoplasmic part;cytosol;intracellular;intracellular part	7	7	6	2	4	5	0	2	2	1	2	2	10.9	97.597	Q12979;F5H8B3;Q12979-2;B7Z683;E9PFN9;F5H3S2	Q12979;F5H8B3;Q12979-2;B7Z683;E9PFN9	Active breakpoint cluster region-related protein	20.2614	20.675	21.2779	NaN	20.1277	21.2743	NaN	20.195	20.889
ACAA1	10	Benzoate degradation;Biosynthesis of unsaturated fatty acids;Fatty acid metabolism;Peroxisome;PPAR signaling pathway;Valine, leucine and isoleucine degradation	3D-structure;Acyltransferase;Completeproteome;Fattyacidmetabolism;Lipidmetabolism;Peroxisome;Phosphoprotein;Polymorphism;Referenceproteome;Transferase;Transitpeptide	carboxylic acid catabolic process;carboxylic acid metabolic process;catabolic process;cellular catabolic process;cellular ketone metabolic process;cellular lipid catabolic process;cellular lipid metabolic process;cellular metabolic process;cellular process;fatty acid beta-oxidation;fatty acid beta-oxidation using acyl-CoA oxidase;fatty acid catabolic process;fatty acid metabolic process;fatty aci…	acetyl-CoA C-acyltransferase activity;binding;C-acyltransferase activity;catalytic activity;protein binding;transferase activity;transferase activity, transferring acyl groups;transferase activity, transferring acyl groups other than amino-acyl groups	cell part;cytoplasmic part;intracellular membrane-bounded organelle;intracellular organelle;intracellular organelle lumen;intracellular organelle part;intracellular part;membrane-bounded organelle;membrane-enclosed lumen;microbody lumen;microbody part;organelle;organelle lumen;organelle part;peroxisomal matrix;peroxisomal part	8	8	8	4	5	8	1	3	4	2	3	6	31.4	44.292	P09110;C9JDE9;F5GXL8;H7C131;G5E935;H0Y4D4;B4DVF4;B4E072;F2Z3P7;F2Z2Q6	P09110;C9JDE9;F5GXL8;H7C131;G5E935	3-ketoacyl-CoA thiolase, peroxisomal	21.186	20.4808	22.0047	NaN	20.1719	22.0782	21.808	21.071	22.3551
ACAA2	1	Benzoate degradation;Fatty acid elongation in mitochondria;Fatty acid metabolism;Valine, leucine and isoleucine degradation	Acetylation;Acyltransferase;Completeproteome;Directproteinsequencing;Fattyacidmetabolism;Lipidmetabolism;Mitochondrion;Phosphoprotein;Polymorphism;Referenceproteome;Transferase;Transitpeptide	alcohol metabolic process;anti-apoptosis;biological regulation;biosynthetic process;cholesterol biosynthetic process;cholesterol metabolic process;lipid biosynthetic process;lipid metabolic process;metabolic process;negative regulation of apoptosis;negative regulation of biological process;negative regulation of cell death;negative regulation of cellular process;negative regulation of programmed …	acetyl-CoA C-acyltransferase activity;binding;C-acyltransferase activity;catalytic activity;protein binding;transferase activity;transferase activity, transferring acyl groups;transferase activity, transferring acyl groups other than amino-acyl groups		12	12	12	8	10	11	8	7	7	8	6	7	45.3	41.924	P42765	P42765	3-ketoacyl-CoA thiolase, mitochondrial	23.7879	23.2101	24.0632	24.1308	23.3601	24.2997	23.9891	23.5337	24.2587
ACACA	12	Fatty acid biosynthesis;Insulin signaling pathway;Propanoate metabolism;Pyruvate metabolism	3D-structure;Acetylation;Allostericenzyme;Alternativepromoterusage;Alternativesplicing;ATP-binding;Biotin;Completeproteome;Cytoplasm;Directproteinsequencing;Fattyacidbiosynthesis;Ligase;Lipidsynthesis;Manganese;Membrane;Metal-binding;Multifunctionalenzyme;Nucleotide-binding;Phosphoprotein;Polymorphism;Referenceproteome	acetyl-CoA metabolic process;acyl-CoA biosynthetic process;acyl-CoA metabolic process;acylglycerol biosynthetic process;acylglycerol metabolic process;amine transport;amino acid transmembrane transport;amino acid transport;betaine transport;biological regulation;biosynthetic process;carboxylic acid biosynthetic process;carboxylic acid metabolic process;carboxylic acid transport;carnitine shuttle;…	acetyl-CoA carboxylase activity;adenyl nucleotide binding;adenyl ribonucleotide binding;ATP binding;binding;biotin carboxylase activity;catalytic activity;cation binding;CoA carboxylase activity;ion binding;ligase activity;ligase activity, forming carbon-carbon bonds;ligase activity, forming carbon-nitrogen bonds;metal ion binding;nucleotide binding;protein binding;purine nucleotide binding;purin…	cell part;cytoplasmic part;cytosol;endomembrane system;Golgi apparatus;intracellular membrane-bounded organelle;intracellular organelle;intracellular part;membrane;membrane-bounded organelle;organelle	11	11	11	2	7	7	1	9	7	1	8	9	6.3	270	Q13085-4;Q13085;Q13085-2;Q13085-3;F8W6G0;O00763;F8W8T8;O00763-2;H7BYH5;H0YGH5;F6QQI9;A8MYL5	Q13085-4;Q13085;Q13085-2;Q13085-3;F8W6G0	Acetyl-CoA carboxylase 1;Biotin carboxylase	NaN	22.0023	21.7451	NaN	21.3136	21.729	NaN	21.3353	21.7152
ACAD8	6	Valine, leucine and isoleucine degradation	3D-structure;Activator;Branched-chainaminoacidcatabolism;Completeproteome;Directproteinsequencing;Diseasemutation;FAD;Flavoprotein;Mitochondrion;Oxidoreductase;Referenceproteome;Transcription;Transcriptionregulation;Transitpeptide	amine catabolic process;amine metabolic process;biological regulation;biosynthetic process;branched chain family amino acid catabolic process;branched chain family amino acid metabolic process;carboxylic acid catabolic process;carboxylic acid metabolic process;catabolic process;cellular amine metabolic process;cellular amino acid catabolic process;cellular amino acid metabolic process;cellular bi…	acyl-CoA dehydrogenase activity;binding;catalytic activity;coenzyme binding;cofactor binding;flavin adenine dinucleotide binding;oxidoreductase activity;oxidoreductase activity, acting on the CH-CH group of donors	cell part;cytoplasmic part;intracellular organelle lumen;intracellular organelle part;intracellular part;membrane-enclosed lumen;mitochondrial matrix;mitochondrial part;organelle lumen;organelle part	2	2	2	2	2	1	2	0	2	2	1	2	5.1	45.069	Q9UKU7;F5H2N4;B7Z5W4;Q6ZWP6;B7Z7F1;E9PLS3	Q9UKU7;F5H2N4;B7Z5W4;Q6ZWP6;B7Z7F1;E9PLS3	Isobutyryl-CoA dehydrogenase, mitochondrial	NaN	18.5148	NaN	20.1448	NaN	NaN	NaN	NaN	NaN
ACAD9	5	Geraniol degradation;Naphthalene degradation	Acetylation;Completeproteome;FAD;Flavoprotein;Mitochondrion;Oxidoreductase;Polymorphism;Referenceproteome;Transitpeptide		acyl-CoA dehydrogenase activity;binding;catalytic activity;coenzyme binding;cofactor binding;flavin adenine dinucleotide binding;oxidoreductase activity;oxidoreductase activity, acting on the CH-CH group of donors	cell part;cell projection;cytoplasmic part;dendrite;intracellular membrane-bounded organelle;intracellular organelle;intracellular part;membrane-bounded organelle;mitochondrion;neuron projection;nucleus;organelle	8	8	8	4	5	7	4	2	4	6	4	5	15.9	68.76	Q9H845;F8WAN8;H0Y8Z9;E7EPE0;D6RCD8	Q9H845;F8WAN8;H0Y8Z9	Acyl-CoA dehydrogenase family member 9, mitochondrial	21.6647	21.4723	21.7017	20.82	20.6635	21.8029	20.9282	21.2344	21.9445
ACADM	8	beta-Alanine metabolism;Fatty acid metabolism;PPAR signaling pathway;Propanoate metabolism;Valine, leucine and isoleucine degradation	3D-structure;Acetylation;Alternativesplicing;Completeproteome;Directproteinsequencing;Diseasemutation;FAD;Fattyacidmetabolism;Flavoprotein;Lipidmetabolism;Mitochondrion;Oxidoreductase;Polymorphism;Referenceproteome;Transitpeptide	amine biosynthetic process;amine metabolic process;betaine biosynthetic process;betaine metabolic process;biosynthetic process;carboxylic acid biosynthetic process;carboxylic acid catabolic process;carboxylic acid metabolic process;carnitine biosynthetic process;carnitine metabolic process;carnitine metabolic process, CoA-linked;catabolic process;cellular amine metabolic process;cellular amino ac…	acryloyl-CoA reductase activity;acyl-CoA dehydrogenase activity;binding;catalytic activity;coenzyme binding;cofactor binding;flavin adenine dinucleotide binding;identical protein binding;medium-chain-acyl-CoA dehydrogenase activity;oxidoreductase activity;oxidoreductase activity, acting on the CH-CH group of donors;oxidoreductase activity, acting on the CH-CH group of donors, NAD or NADP as accep…	axon;cell part;cell projection;cytoplasmic part;intracellular membrane-bounded organelle;intracellular organelle;intracellular organelle lumen;intracellular organelle part;intracellular part;membrane-bounded organelle;membrane-enclosed lumen;mitochondrial matrix;mitochondrial part;mitochondrion;neuron projection;organelle;organelle lumen;organelle part	8	8	8	5	5	6	7	6	7	6	6	6	23.1	50.27	Q5T4U5;P11310-2;P11310;B7Z9I1;B4DJE7;E9PJM9;E9PRX4;H0YDT5	Q5T4U5;P11310-2;P11310;B7Z9I1;B4DJE7	Medium-chain specific acyl-CoA dehydrogenase, mitochondrial	24.6767	23.0408	23.5623	24.9532	23.7771	24.4186	24.7184	23.6322	23.9596
ACADS	2	Butanoate metabolism;Fatty acid metabolism;Valine, leucine and isoleucine degradation	3D-structure;Completeproteome;Directproteinsequencing;Diseasemutation;FAD;Fattyacidmetabolism;Flavoprotein;Lipidmetabolism;Mitochondrion;Oxidoreductase;Polymorphism;Referenceproteome;Transitpeptide		acyl-CoA dehydrogenase activity;binding;catalytic activity;coenzyme binding;cofactor binding;flavin adenine dinucleotide binding;oxidoreductase activity;oxidoreductase activity, acting on the CH-CH group of donors	cell part;cytoplasmic part;intracellular organelle lumen;intracellular organelle part;intracellular part;membrane-enclosed lumen;mitochondrial matrix;mitochondrial part;organelle lumen;organelle part	7	7	7	6	2	3	3	0	3	4	1	3	20.1	44.297	P16219;E9PE82	P16219;E9PE82	Short-chain specific acyl-CoA dehydrogenase, mitochondrial	22.3029	20.0869	20.0776	21.3876	NaN	NaN	21.2617	NaN	NaN
ACADSB	2	Fatty acid metabolism;Valine, leucine and isoleucine degradation	3D-structure;Acetylation;Completeproteome;Diseasemutation;FAD;Fattyacidmetabolism;Flavoprotein;Lipidmetabolism;Mitochondrion;Oxidoreductase;Polymorphism;Referenceproteome;Transitpeptide	amine catabolic process;amine metabolic process;branched chain family amino acid catabolic process;branched chain family amino acid metabolic process;carboxylic acid catabolic process;carboxylic acid metabolic process;catabolic process;cellular amine metabolic process;cellular amino acid catabolic process;cellular amino acid metabolic process;cellular catabolic process;cellular ketone metabolic p…	binding;coenzyme binding;cofactor binding;flavin adenine dinucleotide binding	cell part;cytoplasmic part;intracellular organelle lumen;intracellular organelle part;intracellular part;membrane-enclosed lumen;mitochondrial matrix;mitochondrial part;organelle lumen;organelle part	4	4	4	2	0	2	1	1	3	3	2	2	11.3	47.485	P45954;B4DQ51	P45954;B4DQ51	Short/branched chain specific acyl-CoA dehydrogenase, mitochondrial	NaN	NaN	NaN	NaN	NaN	20.0552	20.3979	NaN	NaN
ACADVL	5	Fatty acid metabolism	3D-structure;Acetylation;Alternativesplicing;Cardiomyopathy;Completeproteome;Diseasemutation;FAD;Fattyacidmetabolism;Flavoprotein;Isopeptidebond;Lipidmetabolism;Membrane;Mitochondrion;Mitochondrioninnermembrane;Oxidoreductase;Polymorphism;Referenceproteome;Transitpeptide;Ublconjugation	activation of signaling protein activity involved in unfolded protein response;biological regulation;carboxylic acid catabolic process;carboxylic acid metabolic process;catabolic process;cellular catabolic process;cellular ketone metabolic process;cellular lipid catabolic process;cellular lipid metabolic process;cellular metabolic process;cellular process;energy derivation by oxidation of organic…	acyl-CoA dehydrogenase activity;binding;catalytic activity;coenzyme binding;cofactor binding;flavin adenine dinucleotide binding;long-chain-acyl-CoA dehydrogenase activity;oxidoreductase activity;oxidoreductase activity, acting on the CH-CH group of donors	cell part;cytoplasmic part;intracellular non-membrane-bounded organelle;intracellular organelle;intracellular organelle part;intracellular part;membrane;mitochondrial inner membrane;mitochondrial membrane;mitochondrial nucleoid;mitochondrial part;non-membrane-bounded organelle;nucleoid;organelle;organelle inner membrane;organelle membrane;organelle part	19	19	19	12	15	13	10	12	14	13	12	11	33.4	75.209	G3V1M7;F5H2A9;P49748;P49748-2;F5GYP4	G3V1M7;F5H2A9;P49748;P49748-2;F5GYP4	Very long-chain specific acyl-CoA dehydrogenase, mitochondrial	25.255	24.8643	25.3611	24.9868	24.5959	25.1108	25.3106	24.8344	25.3905
ACAP1	1	Endocytosis	3D-structure;Acetylation;ANKrepeat;Completeproteome;GTPaseactivation;Metal-binding;Nitration;Phosphoprotein;Polymorphism;Proteintransport;Referenceproteome;Repeat;Transport;Zinc;Zinc-finger	biological regulation;cellular process;cellular response to stimulus;establishment of localization;establishment of protein localization;intracellular signal transduction;lipid metabolic process;metabolic process;primary metabolic process;protein transport;regulation of ARF GTPase activity;regulation of biological process;regulation of catabolic process;regulation of catalytic activity;regulation…	ARF GTPase activator activity;binding;catalytic activity;cation binding;enzyme activator activity;enzyme regulator activity;GTPase activator activity;GTPase regulator activity;hydrolase activity;hydrolase activity, acting on ester bonds;ion binding;lipase activity;metal ion binding;nucleoside-triphosphatase regulator activity;phospholipase activity;phospholipase C activity;phosphoric diester hydr…		5	4	4	3	3	2	3	2	3	1	1	3	11.2	81.535	Q15027	Q15027	Arf-GAP with coiled-coil, ANK repeat and PH domain-containing protein 1	20.2137	20.2004	20.4661	19.9701	19.8783	20.5089	NaN	NaN	20.2757
ACAP2	4	Endocytosis	ANKrepeat;Coiledcoil;Completeproteome;GTPaseactivation;Metal-binding;Phosphoprotein;Referenceproteome;Repeat;Zinc;Zinc-finger	biological regulation;regulation of ARF GTPase activity;regulation of biological process;regulation of catabolic process;regulation of catalytic activity;regulation of cellular catabolic process;regulation of cellular metabolic process;regulation of cellular process;regulation of GTP catabolic process;regulation of GTPase activity;regulation of hydrolase activity;regulation of metabolic process;r…	ARF GTPase activator activity;binding;cation binding;enzyme activator activity;enzyme regulator activity;GTPase activator activity;GTPase regulator activity;ion binding;metal ion binding;nucleoside-triphosphatase regulator activity;small GTPase regulator activity;transition metal ion binding;zinc ion binding		5	5	4	0	3	3	1	0	0	1	2	0	9.3	88.028	Q15057;H7C3K3;H7C3Q8;C9J8L1	Q15057	Arf-GAP with coiled-coil, ANK repeat and PH domain-containing protein 2	NaN	20.3422	20.2293	NaN	NaN	NaN	NaN	20.6438	NaN
ACAT1	4	Benzoate degradation;Butanoate metabolism;Carbon fixation pathways in prokaryotes;Fatty acid metabolism;Glyoxylate and dicarboxylate metabolism;Lysine degradation;Propanoate metabolism;Pyruvate metabolism;Synthesis and degradation of ketone bodies;Terpenoid backbone biosynthesis;Tryptophan metabolism;Two-component system;Valine, leucine and isoleucine degradation	3D-structure;Acetylation;Acyltransferase;Completeproteome;Directproteinsequencing;Diseasemutation;Metal-binding;Mitochondrion;Polymorphism;Potassium;Referenceproteome;Transferase;Transitpeptide	amine catabolic process;amine metabolic process;biosynthetic process;branched chain family amino acid catabolic process;branched chain family amino acid metabolic process;carboxylic acid catabolic process;carboxylic acid metabolic process;catabolic process;cellular amine metabolic process;cellular amino acid catabolic process;cellular amino acid metabolic process;cellular biosynthetic process;cel…	acetyl-CoA C-acetyltransferase activity;acetyl-CoA C-acyltransferase activity;acetyltransferase activity;binding;C-acetyltransferase activity;C-acyltransferase activity;catalytic activity;cation binding;ion binding;metal ion binding;transferase activity;transferase activity, transferring acyl groups;transferase activity, transferring acyl groups other than amino-acyl groups	cell part;cytoplasmic part;intracellular organelle lumen;intracellular organelle part;intracellular part;membrane-enclosed lumen;mitochondrial matrix;mitochondrial part;organelle lumen;organelle part	17	17	17	7	11	12	10	10	13	9	8	10	46.8	45.199	P24752;G3XAB4;E9PRQ6;H0YEL7	P24752	Acetyl-CoA acetyltransferase, mitochondrial	23.4833	23.8764	24.5929	24.4898	23.3494	24.9939	24.1681	23.6841	24.7072
ACAT2	2	Benzoate degradation;Butanoate metabolism;Carbon fixation pathways in prokaryotes;Fatty acid metabolism;Glyoxylate and dicarboxylate metabolism;Lysine degradation;Propanoate metabolism;Pyruvate metabolism;Synthesis and degradation of ketone bodies;Terpenoid backbone biosynthesis;Tryptophan metabolism;Two-component system;Valine, leucine and isoleucine degradation	3D-structure;Acetylation;Acyltransferase;Completeproteome;Cytoplasm;Directproteinsequencing;Polymorphism;Referenceproteome;Transferase	lipid metabolic process;metabolic process;primary metabolic process	acetyl-CoA C-acetyltransferase activity;acetyl-CoA C-acyltransferase activity;acetyltransferase activity;C-acetyltransferase activity;C-acyltransferase activity;catalytic activity;transferase activity;transferase activity, transferring acyl groups;transferase activity, transferring acyl groups other than amino-acyl groups	cell part;cytoplasmic part;intracellular membrane-bounded organelle;intracellular non-membrane-bounded organelle;intracellular organelle;intracellular organelle part;intracellular part;membrane-bounded organelle;mitochondrion;non-membrane-bounded organelle;nuclear part;nucleolus;organelle;organelle part	7	7	7	2	4	4	3	3	3	3	1	1	30.5	41.35	Q9BWD1;B7Z233	Q9BWD1;B7Z233	Acetyl-CoA acetyltransferase, cytosolic	22.29	21.1151	21.4358	21.6492	22.2416	21.8137	21.197	NaN	NaN
ACBD3	1		Coiledcoil;Completeproteome;Directproteinsequencing;Golgiapparatus;Lipidsynthesis;Membrane;Mitochondrion;Phosphoprotein;Polymorphism;Referenceproteome;Steroidbiosynthesis	biosynthetic process;establishment of localization;lipid biosynthetic process;lipid metabolic process;metabolic process;primary metabolic process;steroid biosynthetic process;steroid metabolic process;transport	binding;carboxylic acid binding;coenzyme binding;cofactor binding;fatty acid binding;fatty-acyl-CoA binding;lipid binding;monocarboxylic acid binding	cell part;cytoplasmic part;Golgi apparatus part;Golgi membrane;integral to membrane;intracellular membrane-bounded organelle;intracellular organelle;intracellular organelle part;intracellular part;intrinsic to membrane;membrane;membrane part;membrane-bounded organelle;mitochondrion;organelle;organelle membrane;organelle part	4	4	4	3	4	3	3	3	3	3	3	3	11.6	60.593	Q9H3P7	Q9H3P7	Golgi resident protein GCP60	22.1172	21.9408	21.8908	21.7052	21.5995	21.5149	21.7786	21.7693	22.019
ACE	6	Chagas disease (American trypanosomiasis);Hypertrophic cardiomyopathy (HCM);Renin-angiotensin system	3D-structure;Alternativesplicing;Carboxypeptidase;Cellmembrane;Completeproteome;Directproteinsequencing;Disulfidebond;Glycoprotein;Hydrolase;Membrane;Metal-binding;Metalloprotease;Phosphoprotein;Polymorphism;Protease;Referenceproteome;Repeat;Secreted;Signal;Transmembrane;Transmembranehelix;Zinc	acid secretion;anatomical structure development;angiotensin catabolic process in blood;arachidonic acid secretion;biological regulation;blood vessel remodeling;carboxylic acid transport;catabolic process;cell differentiation;cell proliferation;cellular catabolic process;cellular developmental process;cellular metabolic process;cellular process;developmental process;endocrine process;establishment…	actin binding;anion binding;binding;bradykinin receptor binding;carboxypeptidase activity;catalytic activity;cation binding;chloride ion binding;cytoskeletal protein binding;drug binding;endopeptidase activity;exopeptidase activity;G-protein-coupled receptor binding;hydrolase activity;ion binding;metal ion binding;metallopeptidase activity;peptidase activity;peptidase activity, acting on L-amino …	cell fraction;cell part;cytoplasmic part;endosome;external side of plasma membrane;extracellular region part;extracellular space;insoluble fraction;integral to membrane;intracellular membrane-bounded organelle;intracellular organelle;intracellular part;intrinsic to membrane;membrane;membrane fraction;membrane part;membrane-bounded organelle;organelle;plasma membrane;plasma membrane part	4	4	4	0	4	1	0	0	1	0	1	0	3.1	149.71	P12821;P12821-2;P12821-3;P12821-4;F6X3S4;F5H1K1	P12821;P12821-2;P12821-3;P12821-4;F6X3S4	Angiotensin-converting enzyme;Angiotensin-converting enzyme, soluble form	NaN	20.3081	NaN	NaN	NaN	NaN	NaN	NaN	NaN
ACIN1	7	mRNA surveillance pathway;RNA transport;Spliceosome	Acetylation;Alternativesplicing;Apoptosis;Completeproteome;Directproteinsequencing;Isopeptidebond;Methylation;Nucleus;Phosphoprotein;Polymorphism;Referenceproteome;Ublconjugation	apoptotic chromosome condensation;biological regulation;cell differentiation;cellular component organization;cellular component organization at cellular level;cellular component organization or biogenesis;cellular component organization or biogenesis at cellular level;cellular developmental process;cellular macromolecule metabolic process;cellular metabolic process;cellular nitrogen compound meta…	ATPase activity;binding;catalytic activity;enzyme binding;hydrolase activity;hydrolase activity, acting on acid anhydrides;hydrolase activity, acting on acid anhydrides, in phosphorus-containing anhydrides;nucleic acid binding;nucleoside-triphosphatase activity;nucleotide binding;protein binding;pyrophosphatase activity	cell part;cytoplasm;cytoplasmic part;cytosol;intracellular membrane-bounded organelle;intracellular organelle;intracellular organelle part;intracellular part;membrane-bounded organelle;nuclear body;nuclear part;nuclear speck;nucleoplasm part;nucleus;organelle;organelle part	16	16	16	8	12	12	8	6	6	5	5	7	15.7	151.86	Q9UKV3;Q9UKV3-5;E7EQT4;Q9UKV3-2;Q9UKV3-3;G3V3B0;G3V3T3	Q9UKV3;Q9UKV3-5;E7EQT4;Q9UKV3-2;Q9UKV3-3;G3V3B0	Apoptotic chromatin condensation inducer in the nucleus	23.9078	23.4731	23.4414	23.2691	23.8205	23.1371	23.2317	23.1099	23.7197
ACLY	4	Carbon fixation pathways in prokaryotes;Citrate cycle (TCA cycle)	3D-structure;Acetylation;Alternativesplicing;ATP-binding;Completeproteome;Cytoplasm;Lipidsynthesis;Magnesium;Metal-binding;Nucleotide-binding;Phosphoprotein;Polymorphism;Referenceproteome;Transferase;Ublconjugation	acyl-CoA biosynthetic process;acyl-CoA metabolic process;acylglycerol biosynthetic process;acylglycerol metabolic process;ATP catabolic process;ATP metabolic process;biological regulation;biosynthetic process;carbohydrate metabolic process;carboxylic acid metabolic process;catabolic process;cellular biosynthetic process;cellular carbohydrate metabolic process;cellular catabolic process;cellular k…	acid-thiol ligase activity;adenyl nucleotide binding;adenyl ribonucleotide binding;ATP binding;ATP citrate synthase activity;binding;catalytic activity;cation binding;CoA-ligase activity;ion binding;ligase activity;ligase activity, forming carbon-sulfur bonds;metal ion binding;nucleotide binding;purine nucleotide binding;purine ribonucleoside triphosphate binding;purine ribonucleotide binding;rib…	cell part;citrate lyase complex;cytoplasm;cytoplasmic part;cytosol;intracellular membrane-bounded organelle;intracellular organelle;intracellular part;macromolecular complex;membrane;membrane-bounded organelle;nucleus;organelle;plasma membrane;protein complex	27	27	27	15	21	22	15	16	16	15	19	16	30	126.22	E7ENH9;P53396;P53396-2;B4E3P0	E7ENH9;P53396;P53396-2;B4E3P0	ATP-citrate synthase	24.6675	24.9305	25.3456	23.9349	24.6267	24.8642	24.0575	24.9937	24.8655
ACO1;IRP1	4	Carbon fixation pathways in prokaryotes;Citrate cycle (TCA cycle);Glyoxylate and dicarboxylate metabolism	3D-structure;4Fe-4S;Completeproteome;Cytoplasm;Directproteinsequencing;Iron;Iron-sulfur;Lyase;Metal-binding;Polymorphism;Referenceproteome;RNA-binding;Tricarboxylicacidcycle	acetyl-CoA catabolic process;acetyl-CoA metabolic process;carboxylic acid metabolic process;catabolic process;cellular catabolic process;cellular ketone metabolic process;cellular metabolic process;cellular process;citrate metabolic process;coenzyme catabolic process;coenzyme metabolic process;cofactor catabolic process;cofactor metabolic process;metabolic process;organic acid metabolic process;o…	4 iron, 4 sulfur cluster binding;aconitate hydratase activity;binding;carbon-oxygen lyase activity;catalytic activity;cation binding;citrate hydro-lyase (cis-aconitate-forming) activity;hydro-lyase activity;ion binding;iron-responsive element binding;iron-sulfur cluster binding;isocitrate hydro-lyase (cis-aconitate-forming) activity;lyase activity;metal cluster binding;metal ion binding;mRNA bind…	cell part;cytoplasmic part;cytosol;endoplasmic reticulum;Golgi apparatus;intracellular membrane-bounded organelle;intracellular organelle;intracellular part;membrane-bounded organelle;mitochondrion;organelle	9	9	9	5	5	3	7	5	6	6	5	4	18.4	98.398	P21399;Q9HBB2;Q59FI0;Q5VZA6	P21399;Q9HBB2;Q59FI0	Cytoplasmic aconitate hydratase	21.4894	21.1349	21.1232	22.177	21.08	21.4164	21.7743	20.8633	20.5988
ACO2	5	Carbon fixation pathways in prokaryotes;Citrate cycle (TCA cycle);Glyoxylate and dicarboxylate metabolism	4Fe-4S;Acetylation;Completeproteome;Directproteinsequencing;Iron;Iron-sulfur;Isopeptidebond;Lyase;Metal-binding;Mitochondrion;Polymorphism;Pyrrolidonecarboxylicacid;Referenceproteome;Transitpeptide;Tricarboxylicacidcycle;Ublconjugation	acetyl-CoA catabolic process;acetyl-CoA metabolic process;carboxylic acid metabolic process;catabolic process;cellular catabolic process;cellular ketone metabolic process;cellular metabolic process;cellular process;citrate metabolic process;coenzyme catabolic process;coenzyme metabolic process;cofactor catabolic process;cofactor metabolic process;metabolic process;organic acid metabolic process;o…	4 iron, 4 sulfur cluster binding;aconitate hydratase activity;binding;carbon-oxygen lyase activity;catalytic activity;cation binding;citrate hydro-lyase (cis-aconitate-forming) activity;hydro-lyase activity;ion binding;iron ion binding;iron-sulfur cluster binding;isocitrate hydro-lyase (cis-aconitate-forming) activity;lyase activity;metal cluster binding;metal ion binding;transition metal ion bin…	cell part;cytoplasmic part;intracellular membrane-bounded organelle;intracellular organelle;intracellular organelle lumen;intracellular organelle part;intracellular part;membrane-bounded organelle;membrane-enclosed lumen;mitochondrial matrix;mitochondrial part;mitochondrion;nucleus;organelle;organelle lumen;organelle part	22	22	22	14	13	17	19	13	17	14	14	15	33.4	87.819	A2A274;Q99798;F5H2A5;B4DEC3;B4DW08	A2A274;Q99798;F5H2A5;B4DEC3;B4DW08	Aconitate hydratase, mitochondrial	25.5224	24.3592	24.9243	25.9266	24.473	25.1206	25.4628	24.9182	24.9193
ACOT13	2		3D-structure;Completeproteome;Cytoplasm;Hydrolase;Mitochondrion;Referenceproteome	cellular component assembly;cellular component organization;cellular component organization or biogenesis;macromolecular complex assembly;macromolecular complex subunit organization;protein complex assembly;protein complex subunit organization;protein homooligomerization;protein homotetramerization;protein oligomerization;protein tetramerization	acyl-CoA hydrolase activity;catalytic activity;CoA hydrolase activity;hydrolase activity;hydrolase activity, acting on ester bonds;thiolester hydrolase activity	cell part;cytoplasmic part;intracellular membrane-bounded organelle;intracellular organelle;intracellular part;membrane-bounded organelle;mitochondrion;organelle	3	3	3	1	2	2	2	1	3	2	1	1	25	14.96	Q9NPJ3;F5H2L4	Q9NPJ3;F5H2L4	Acyl-coenzyme A thioesterase 13	NaN	20.9304	20.8976	21.58	NaN	19.5796	21.5753	NaN	NaN
ACOT2;ACOT1	5	Biosynthesis of unsaturated fatty acids	3D-structure;Acetylation;Alternativesplicing;Completeproteome;Cytoplasm;Directproteinsequencing;Hydrolase;Mitochondrion;Polymorphism;Referenceproteome;Serineesterase;Transitpeptide	acyl-CoA metabolic process;carboxylic acid metabolic process;cellular ketone metabolic process;cellular lipid metabolic process;cellular metabolic process;cellular process;coenzyme metabolic process;cofactor metabolic process;fatty acid metabolic process;lipid metabolic process;long-chain fatty acid metabolic process;metabolic process;monocarboxylic acid metabolic process;organic acid metabolic p…	acyl-CoA thioesterase activity;carboxylesterase activity;carboxylic ester hydrolase activity;catalytic activity;CoA hydrolase activity;hydrolase activity;hydrolase activity, acting on ester bonds;palmitoyl-CoA hydrolase activity;thiolester hydrolase activity	cell part;cytoplasmic part;cytosol;intracellular membrane-bounded organelle;intracellular organelle;intracellular part;membrane-bounded organelle;mitochondrion;organelle	7	7	7	6	1	2	5	3	4	5	3	3	18.8	53.218	P49753;Q86TX2;G3V4F2;P49753-2;B3KSA0	P49753;Q86TX2;G3V4F2;P49753-2;B3KSA0	Acyl-coenzyme A thioesterase 2, mitochondrial;Acyl-coenzyme A thioesterase 1	21.8748	NaN	NaN	22.0077	NaN	20.6382	22.1838	20.5567	NaN
ACOT7	8	Biosynthesis of unsaturated fatty acids	3D-structure;Acetylation;Alternativesplicing;Completeproteome;Cytoplasm;Directproteinsequencing;Hydrolase;Mitochondrion;Referenceproteome;Repeat;Serineesterase	lipid metabolic process;metabolic process;primary metabolic process	acyl-CoA thioesterase activity;binding;carboxylesterase activity;carboxylic acid binding;carboxylic ester hydrolase activity;catalytic activity;CoA hydrolase activity;coenzyme binding;cofactor binding;fatty acid binding;fatty-acyl-CoA binding;hydrolase activity;hydrolase activity, acting on ester bonds;lipid binding;monocarboxylic acid binding;palmitoyl-CoA hydrolase activity;thiolester hydrolase…	cell part;cytoplasmic part;intracellular membrane-bounded organelle;intracellular organelle;intracellular part;membrane-bounded organelle;mitochondrion;organelle	7	7	7	2	4	4	3	4	5	5	4	4	25.3	41.796	O00154;O00154-5;O00154-4;O00154-6;B4DUX0;O00154-3;O00154-2;F5GWE2	O00154;O00154-5;O00154-4;O00154-6;B4DUX0;O00154-3;O00154-2	Cytosolic acyl coenzyme A thioester hydrolase	22.5927	22.9926	22.4148	21.4596	23.1674	22.57	22.088	22.787	22.7189
ACOT8	9	Peroxisome	Acetylation;Completeproteome;Host-virusinteraction;Hydrolase;Peroxisome;Peroxisomebiogenesis;Phosphoprotein;Referenceproteome;Serineesterase	acyl-CoA metabolic process;bile acid biosynthetic process;bile acid metabolic process;biosynthetic process;carboxylic acid biosynthetic process;carboxylic acid catabolic process;carboxylic acid metabolic process;catabolic process;cellular biosynthetic process;cellular catabolic process;cellular component organization;cellular component organization at cellular level;cellular component organizatio…	acyl-CoA hydrolase activity;binding;carboxylesterase activity;carboxylic ester hydrolase activity;catalytic activity;choloyl-CoA hydrolase activity;CoA hydrolase activity;hydrolase activity;hydrolase activity, acting on ester bonds;protein binding;thiolester hydrolase activity	cell part;cytoplasmic part;intracellular organelle lumen;intracellular organelle part;intracellular part;membrane-enclosed lumen;microbody lumen;microbody part;organelle lumen;organelle part;peroxisomal matrix;peroxisomal part	2	2	2	0	0	0	0	0	1	0	0	0	7.8	35.914	O14734;A6NDT2;E9PJN0;H7C5A7;E9PIS4;G5E995;E9PMC4;Q9BR14;H0Y698	O14734;A6NDT2;E9PJN0;H7C5A7;E9PIS4;G5E995;E9PMC4;Q9BR14;H0Y698	Acyl-coenzyme A thioesterase 8	NaN	NaN	NaN	NaN	NaN	19.6165	NaN	NaN	NaN
ACOT9	5		Acetylation;Alternativesplicing;Completeproteome;Hydrolase;Mitochondrion;Polymorphism;Referenceproteome;Serineesterase;Transitpeptide	acyl-CoA metabolic process;cellular metabolic process;cellular process;coenzyme metabolic process;cofactor metabolic process;metabolic process;thioester metabolic process	acetyl-CoA hydrolase activity;carboxylesterase activity;carboxylic ester hydrolase activity;catalytic activity;CoA hydrolase activity;hydrolase activity;hydrolase activity, acting on ester bonds;thiolester hydrolase activity	cell part;cytoplasmic part;intracellular membrane-bounded organelle;intracellular organelle;intracellular part;membrane-bounded organelle;mitochondrion;organelle	3	3	3	2	3	3	2	1	2	1	1	1	6.5	50.85	Q9Y305-4;Q9Y305;Q9Y305-2;Q9Y305-3;H7C5Q2	Q9Y305-4;Q9Y305;Q9Y305-2;Q9Y305-3	Acyl-coenzyme A thioesterase 9, mitochondrial	20.8633	20.0774	20.1459	20.556	NaN	20.3327	NaN	NaN	NaN
ACOX1	4	alpha-Linolenic acid metabolism;Biosynthesis of unsaturated fatty acids;Fatty acid metabolism;Peroxisome;PPAR signaling pathway	Acetylation;Alternativesplicing;Completeproteome;Diseasemutation;FAD;Fattyacidmetabolism;Flavoprotein;Lipidmetabolism;Oxidoreductase;Peroxisome;Phosphoprotein;Polymorphism;Referenceproteome	carboxylic acid catabolic process;carboxylic acid metabolic process;catabolic process;cellular catabolic process;cellular ketone metabolic process;cellular lipid catabolic process;cellular lipid metabolic process;cellular metabolic process;cellular process;fatty acid beta-oxidation;fatty acid beta-oxidation using acyl-CoA oxidase;fatty acid catabolic process;fatty acid metabolic process;fatty aci…	acyl-CoA dehydrogenase activity;acyl-CoA oxidase activity;binding;catalytic activity;coenzyme binding;cofactor binding;flavin adenine dinucleotide binding;oxidoreductase activity;oxidoreductase activity, acting on the CH-CH group of donors;oxidoreductase activity, acting on the CH-CH group of donors, oxygen as acceptor;protein binding;protein N-terminus binding	cell part;cytoplasmic part;intracellular membrane-bounded organelle;intracellular organelle;intracellular organelle lumen;intracellular organelle part;intracellular part;membrane-bounded organelle;membrane-enclosed lumen;microbody;microbody lumen;microbody part;organelle;organelle lumen;organelle part;peroxisomal matrix;peroxisomal part;peroxisome	4	4	4	1	3	0	0	1	2	2	1	1	13.9	74.423	Q15067;Q15067-2;F5GYQ8;F5H0M0	Q15067;Q15067-2;F5GYQ8;F5H0M0	Peroxisomal acyl-coenzyme A oxidase 1;Acyl-coenzyme A oxidase	NaN	NaN	NaN	NaN	NaN	21.2173	20.4623	NaN	NaN
ACP1	8	Riboflavin metabolism	3D-structure;Acetylation;Alternativesplicing;Completeproteome;Cytoplasm;Directproteinsequencing;Hydrolase;Phosphoprotein;Polymorphism;Proteinphosphatase;Referenceproteome		acid phosphatase activity;binding;catalytic activity;hydrolase activity;hydrolase activity, acting on ester bonds;non-membrane spanning protein tyrosine phosphatase activity;phosphatase activity;phosphoprotein phosphatase activity;phosphoric ester hydrolase activity;protein binding;protein tyrosine phosphatase activity	cell fraction;cell part;cytoplasm;internal side of plasma membrane;intracellular membrane-bounded organelle;intracellular organelle;intracellular part;membrane part;membrane-bounded organelle;nucleus;organelle;plasma membrane part;soluble fraction	3	3	3	2	3	3	3	3	3	2	3	3	24.1	18.042	P24666;P24666-2;P24666-3;B5MCC7;G5E9R5;D3YTI2;C9JNS5;F2Z2Q9	P24666;P24666-2;P24666-3;B5MCC7;G5E9R5	Low molecular weight phosphotyrosine protein phosphatase	22.8521	21.8645	22.5646	23.3559	23.0547	22.4316	23.2516	22.8113	22.822
ACSF2	6		Acetylation;ATP-binding;Completeproteome;Fattyacidmetabolism;Ligase;Lipidmetabolism;Mitochondrion;Nucleotide-binding;Polymorphism;Referenceproteome;Transitpeptide	carboxylic acid metabolic process;cellular ketone metabolic process;cellular lipid metabolic process;cellular metabolic process;cellular process;fatty acid metabolic process;lipid metabolic process;metabolic process;monocarboxylic acid metabolic process;organic acid metabolic process;oxoacid metabolic process;primary metabolic process;small molecule metabolic process	adenyl nucleotide binding;adenyl ribonucleotide binding;ATP binding;binding;catalytic activity;ligase activity;nucleotide binding;purine nucleotide binding;purine ribonucleoside triphosphate binding;purine ribonucleotide binding;ribonucleotide binding	cell part;cytoplasmic part;intracellular membrane-bounded organelle;intracellular organelle;intracellular part;membrane-bounded organelle;mitochondrion;organelle	4	4	4	2	1	2	3	1	3	4	1	1	10.5	70.622	B4DFQ6;Q96CM8;B4DHT5;E9PF16;B4DUF5;D6RF87	B4DFQ6;Q96CM8;B4DHT5;E9PF16;B4DUF5	Acyl-CoA synthetase family member 2, mitochondrial	NaN	NaN	NaN	21.7234	NaN	21.3398	20.8061	NaN	NaN
ACSF3	5		Acetylation;ATP-binding;Completeproteome;Fattyacidmetabolism;Ligase;Lipidmetabolism;Mitochondrion;Nucleotide-binding;Polymorphism;Referenceproteome;Transitpeptide	biosynthetic process;carboxylic acid biosynthetic process;carboxylic acid catabolic process;carboxylic acid metabolic process;catabolic process;cellular biosynthetic process;cellular catabolic process;cellular ketone metabolic process;cellular lipid metabolic process;cellular metabolic process;cellular process;dicarboxylic acid catabolic process;dicarboxylic acid metabolic process;fatty acid bios…	acid-thiol ligase activity;adenyl nucleotide binding;adenyl ribonucleotide binding;ATP binding;binding;catalytic activity;ligase activity;ligase activity, forming carbon-sulfur bonds;malonyl-CoA synthetase activity;nucleotide binding;purine nucleotide binding;purine ribonucleoside triphosphate binding;purine ribonucleotide binding;ribonucleotide binding	cell part;cytoplasmic part;intracellular membrane-bounded organelle;intracellular organelle;intracellular part;membrane-bounded organelle;mitochondrion;organelle	6	6	1	2	4	1	3	2	3	2	2	2	13.5	64.129	Q4G176;H0YGC7;F5H2G6;F5GX20;H0YH37	Q4G176;H0YGC7	Acyl-CoA synthetase family member 3, mitochondrial	21.1021	20.2722	NaN	21.9003	19.6726	21.2463	20.4031	20.0979	20.6755
ACSL1	7	Adipocytokine signaling pathway;Fatty acid metabolism;Peroxisome;PPAR signaling pathway	Acetylation;Alternativesplicing;ATP-binding;Completeproteome;Directproteinsequencing;Endoplasmicreticulum;Fattyacidmetabolism;Ligase;Lipidmetabolism;Magnesium;Membrane;Microsome;Mitochondrion;Mitochondrionoutermembrane;Nucleotide-binding;Peroxisome;Phosphoprotein;Referenceproteome;Signal-anchor;Transmembrane;Transmembranehelix	acyl-CoA biosynthetic process;acyl-CoA metabolic process;acylglycerol biosynthetic process;acylglycerol metabolic process;biological regulation;biosynthetic process;carboxylic acid metabolic process;cellular biosynthetic process;cellular ketone metabolic process;cellular lipid metabolic process;cellular metabolic process;cellular process;coenzyme biosynthetic process;coenzyme metabolic process;co…	adenyl nucleotide binding;adenyl ribonucleotide binding;ATP binding;binding;catalytic activity;fatty acid ligase activity;ligase activity;ligase activity, forming carbon-sulfur bonds;long-chain fatty acid-CoA ligase activity;nucleotide binding;purine nucleotide binding;purine ribonucleoside triphosphate binding;purine ribonucleotide binding;ribonucleotide binding	cell fraction;cell part;cytoplasmic part;endoplasmic reticulum membrane;endoplasmic reticulum part;insoluble fraction;integral to membrane;intracellular membrane-bounded organelle;intracellular organelle;intracellular organelle part;intracellular part;intrinsic to membrane;membrane;membrane fraction;membrane part;membrane-bounded organelle;microbody;microbody membrane;microbody part;microsome;mit…	3	3	3	1	1	3	0	1	1	2	1	3	4.4	77.906	B7Z452;P33121;P33121-2;E7EPM6;B7Z3Z9;D6RER0;H0Y9Z9	B7Z452;P33121;P33121-2;E7EPM6;B7Z3Z9;D6RER0;H0Y9Z9	Long-chain-fatty-acid--CoA ligase 1	NaN	NaN	19.6897	NaN	NaN	NaN	NaN	NaN	20.1181
ACSL4	8	Adipocytokine signaling pathway;Fatty acid metabolism;Peroxisome;PPAR signaling pathway	Acetylation;Alportsyndrome;Alternativesplicing;ATP-binding;Completeproteome;Deafness;Diseasemutation;Elliptocytosis;Endoplasmicreticulum;Fattyacidmetabolism;Hereditaryhemolyticanemia;Ligase;Lipidmetabolism;Magnesium;Membrane;Mentalretardation;Microsome;Mitochondrion;Mitochondrionoutermembrane;Nucleotide-binding;Peroxisome;Phosphoprotein;Polymorphism;Referenceproteome;Signal-anchor;Transmembrane;T…	acyl-CoA biosynthetic process;acyl-CoA metabolic process;acylglycerol biosynthetic process;acylglycerol metabolic process;biological regulation;biosynthetic process;carboxylic acid metabolic process;cellular biosynthetic process;cellular ketone metabolic process;cellular lipid metabolic process;cellular metabolic process;cellular process;coenzyme biosynthetic process;coenzyme metabolic process;co…	adenyl nucleotide binding;adenyl ribonucleotide binding;ATP binding;binding;C-acyltransferase activity;catalytic activity;fatty acid ligase activity;fatty-acyl-CoA synthase activity;ligase activity;ligase activity, forming carbon-sulfur bonds;long-chain fatty acid-CoA ligase activity;nucleotide binding;purine nucleotide binding;purine ribonucleoside triphosphate binding;purine ribonucleotide bind…	cell fraction;cell part;cytoplasmic part;endoplasmic reticulum membrane;endoplasmic reticulum part;insoluble fraction;integral to membrane;intracellular membrane-bounded organelle;intracellular organelle;intracellular organelle part;intracellular part;intrinsic to membrane;membrane;membrane fraction;membrane part;membrane-bounded organelle;microbody;microbody membrane;microbody part;microsome;mit…	8	8	8	0	0	5	0	0	3	0	2	3	17.7	79.187	O60488;O60488-2;H0Y9A0;O95573;D6RF95;D6RD96;D6RDA8;D6RFW9	O60488;O60488-2	Long-chain-fatty-acid--CoA ligase 4	NaN	NaN	21.8523	NaN	NaN	21.4588	NaN	20.4579	21.9474
ACSS1	6	Carbon fixation pathways in prokaryotes;Glycolysis / Gluconeogenesis;Methane metabolism;Propanoate metabolism;Pyruvate metabolism	3D-structure;Acetylation;Alternativesplicing;ATP-binding;Completeproteome;Directproteinsequencing;Ligase;Mitochondrion;Nucleotide-binding;Polymorphism;Referenceproteome;Transitpeptide	acetyl-CoA biosynthetic process;acetyl-CoA metabolic process;alcohol metabolic process;biosynthetic process;cellular biosynthetic process;cellular metabolic process;cellular process;coenzyme biosynthetic process;coenzyme metabolic process;cofactor biosynthetic process;cofactor metabolic process;ethanol metabolic process;ethanol oxidation;metabolic process;oxidation-reduction process;primary alcoh…	acetate-CoA ligase activity;acid-thiol ligase activity;adenyl nucleotide binding;adenyl ribonucleotide binding;AMP binding;ATP binding;binding;catalytic activity;CoA-ligase activity;ligase activity;ligase activity, forming carbon-sulfur bonds;nucleotide binding;protein binding;purine nucleotide binding;purine ribonucleoside triphosphate binding;purine ribonucleotide binding;ribonucleotide binding	cell part;cytoplasmic part;intracellular organelle lumen;intracellular organelle part;intracellular part;membrane-enclosed lumen;mitochondrial matrix;mitochondrial part;organelle lumen;organelle part	6	6	6	3	2	5	4	2	3	4	3	3	10.6	74.856	Q9NUB1;Q9NUB1-2;Q6ZV30;F5H6F4;E9PC79;F8W7Y1	Q9NUB1;Q9NUB1-2;Q6ZV30;F5H6F4;E9PC79;F8W7Y1	Acetyl-coenzyme A synthetase 2-like, mitochondrial	22.3568	21.1019	20.6646	22.1663	20.1829	20.3917	22.2091	20.7872	20.8274
ACTBL2	1		ATP-binding;Completeproteome;Cytoplasm;Cytoskeleton;Nucleotide-binding;Referenceproteome		adenyl nucleotide binding;adenyl ribonucleotide binding;ATP binding;binding;nucleotide binding;purine nucleotide binding;purine ribonucleoside triphosphate binding;purine ribonucleotide binding;ribonucleotide binding	cell part;cytoplasm;cytoskeleton;intracellular non-membrane-bounded organelle;intracellular organelle;intracellular part;non-membrane-bounded organelle;organelle	8	2	2	6	6	4	6	6	6	5	5	6	23.9	42.003	Q562R1	Q562R1	Beta-actin-like protein 2	NaN	NaN	NaN	30.3636	NaN	NaN	NaN	NaN	NaN
ACTG1	2	Adherens junction;Arrhythmogenic right ventricular cardiomyopathy (ARVC);Bacterial invasion of epithelial cells;Dilated cardiomyopathy;Focal adhesion;Hypertrophic cardiomyopathy (HCM);Leukocyte transendothelial migration;Pathogenic Escherichia coli infection;Phagosome;Phototransduction - fly;Regulation of actin cytoskeleton;Shigellosis;Tight junction;Vibrio cholerae infection;Viral myocarditis	Acetylation;ATP-binding;Completeproteome;Cytoplasm;Cytoskeleton;Deafness;Directproteinsequencing;Diseasemutation;Methylation;Non-syndromicdeafness;Nucleotide-binding;Phosphoprotein;Polymorphism;Referenceproteome	adherens junction organization;axon guidance;biological regulation;blood coagulation;cell junction assembly;cell junction organization;cell-cell junction organization;cellular component assembly;cellular component assembly at cellular level;cellular component movement;cellular component organization;cellular component organization at cellular level;cellular component organization or biogenesis;ce…	adenyl nucleotide binding;adenyl ribonucleotide binding;ATP binding;binding;identical protein binding;nucleotide binding;protein binding;purine nucleotide binding;purine ribonucleoside triphosphate binding;purine ribonucleotide binding;ribonucleotide binding;structural constituent of cytoskeleton;structural molecule activity	cell part;cytoplasm;cytoplasmic part;cytoskeleton;cytosol;intracellular non-membrane-bounded organelle;intracellular organelle;intracellular part;non-membrane-bounded organelle;organelle	23	1	1	16	16	17	16	16	16	16	14	16	68.8	41.792	P63261;F5H0N0	P63261;F5H0N0	Actin, cytoplasmic 2;Actin, cytoplasmic 2, N-terminally processed	NaN	NaN	NaN	NaN	NaN	NaN	22.0273	NaN	NaN
ACTL6A	5		Acetylation;Activator;Alternativesplicing;Chromatinregulator;Completeproteome;Directproteinsequencing;DNAdamage;DNArecombination;DNArepair;Growthregulation;Neurogenesis;Nucleus;Phosphoprotein;Referenceproteome;Transcription;Transcriptionregulation	anatomical structure development;biological regulation;biosynthetic process;cellular biosynthetic process;cellular component organization;cellular component organization at cellular level;cellular component organization or biogenesis;cellular component organization or biogenesis at cellular level;cellular macromolecule biosynthetic process;cellular macromolecule metabolic process;cellular metabol…	adenyl nucleotide binding;adenyl ribonucleotide binding;ATP binding;binding;chromatin binding;nucleotide binding;protein binding;protein binding transcription factor activity;purine nucleotide binding;purine ribonucleoside triphosphate binding;purine ribonucleotide binding;ribonucleotide binding;structural constituent of cytoskeleton;structural molecule activity;transcription coactivator activity…	cell part;chromatin remodeling complex;chromosomal part;DNA helicase complex;H4/H2A histone acetyltransferase complex;histone acetyltransferase complex;Ino80 complex;intracellular non-membrane-bounded organelle;intracellular organelle;intracellular organelle part;intracellular part;macromolecular complex;membrane;nBAF complex;non-membrane-bounded organelle;npBAF complex;NuA4 histone acetyltransfe…	10	10	10	4	7	7	6	7	5	4	3	3	26.6	47.46	O96019;O96019-2;H7C5S0;C9JQT2;O94805	O96019;O96019-2;H7C5S0	Actin-like protein 6A	23.1418	22.6905	22.6349	23.3715	23.1807	22.6565	23.3246	23.0452	23.6578
ACTN1	14	Adherens junction;Amoebiasis;Arrhythmogenic right ventricular cardiomyopathy (ARVC);Focal adhesion;Leukocyte transendothelial migration;Regulation of actin cytoskeleton;Systemic lupus erythematosus;Tight junction	3D-structure;Acetylation;Actin-binding;Alternativesplicing;Calcium;Cellmembrane;Cellprojection;Completeproteome;Cytoplasm;Cytoskeleton;Directproteinsequencing;Membrane;Phosphoprotein;Polymorphism;Referenceproteome;Repeat	biological regulation;cell activation;cell junction assembly;cell junction organization;cell-substrate junction assembly;cellular component assembly;cellular component assembly at cellular level;cellular component organization;cellular component organization at cellular level;cellular component organization or biogenesis;cellular component organization or biogenesis at cellular level;cellular pro…	actin binding;binding;calcium ion binding;cation binding;cytoskeletal protein binding;integrin binding;ion binding;ion channel binding;metal ion binding;protein binding;protein complex binding;receptor binding;vinculin binding	adherens junction;anchoring junction;cell junction;cell part;cell projection;cell-substrate adherens junction;cell-substrate junction;contractile fiber part;cytoplasmic membrane-bounded vesicle lumen;cytoplasmic part;cytoplasmic vesicle part;cytoskeleton;cytosol;extracellular region;focal adhesion;intracellular non-membrane-bounded organelle;intracellular organelle;intracellular organelle part;in…	39	26	23	24	27	28	26	25	21	29	23	16	51.4	105.57	P12814-3;P12814;P12814-2;B7TY16;H9KV75;G3V2N5;H0YJW3;G3V2W4;H7C5W8;G3V5M4;H0YJ11;G3V2X9;G3V2E8;G3V380	P12814-3;P12814;P12814-2;B7TY16;H9KV75	Alpha-actinin-1	26.7753	24.7517	25.5952	25.9152	24.7154	24.9104	27.8472	25.095	24.921
ACTN4	11	Adherens junction;Amoebiasis;Arrhythmogenic right ventricular cardiomyopathy (ARVC);Focal adhesion;Leukocyte transendothelial migration;Regulation of actin cytoskeleton;Systemic lupus erythematosus;Tight junction	3D-structure;Acetylation;Actin-binding;Actincapping;Alternativesplicing;Calcium;Completeproteome;Cytoplasm;Cytoskeleton;Diseasemutation;Isopeptidebond;Nucleus;Phosphoprotein;Polymorphism;Proteintransport;Referenceproteome;Repeat;Transport;Ublconjugation	actin filament capping;axon guidance;biological regulation;cell activation;cellular component organization;cellular component organization at cellular level;cellular component organization or biogenesis;cellular component organization or biogenesis at cellular level;cellular process;chemotaxis;cytoskeletal anchoring at plasma membrane;cytoskeleton organization;establishment of localization;establ…	actin binding;actin filament binding;ankyrin binding;binding;calcium ion binding;cation binding;cytoskeletal protein binding;identical protein binding;integrin binding;ion binding;metal ion binding;nucleoside binding;protein binding;protein complex binding;protein dimerization activity;protein homodimerization activity;receptor binding;structural constituent of cytoskeleton;structural molecule ac…	cell cortex part;cell part;cell projection;cytoplasmic membrane-bounded vesicle lumen;cytoplasmic part;cytoplasmic vesicle part;cytoskeletal part;cytosol;extracellular region;intracellular membrane-bounded organelle;intracellular organelle;intracellular organelle part;intracellular part;macromolecular complex;membrane-bounded organelle;membrane-enclosed lumen;nuclear body;nuclear matrix;nuclear p…	44	44	31	23	33	33	29	28	29	24	25	24	58.8	104.85	O43707;D6PXK4;E7EV83;F5GXS2;H7C144;H0YGN3;E9PDB1;Q9H254;Q9H254-4;C9JRP8;Q9H254-2	O43707;D6PXK4;E7EV83;F5GXS2	Alpha-actinin-4	27.0201	26.3035	27.0904	27.0174	26.6352	26.6251	27.0036	26.6603	26.8092
ACTR1A	3		Acetylation;ATP-binding;Completeproteome;Cytoplasm;Cytoskeleton;Directproteinsequencing;Nucleotide-binding;Referenceproteome	cell cycle process;cellular process;establishment of localization;G2/M transition of mitotic cell cycle;transport;vesicle-mediated transport	adenyl nucleotide binding;adenyl ribonucleotide binding;ATP binding;binding;nucleotide binding;purine nucleotide binding;purine ribonucleoside triphosphate binding;purine ribonucleotide binding;ribonucleotide binding	cell part;centrosome;cytoplasm;cytoplasmic part;cytoskeletal part;cytoskeleton;cytosol;dynactin complex;intracellular non-membrane-bounded organelle;intracellular organelle;intracellular organelle part;intracellular part;macromolecular complex;microtubule associated complex;microtubule organizing center;non-membrane-bounded organelle;organelle;organelle part;protein complex	6	6	5	4	5	6	4	4	4	4	4	3	25.5	42.613	P61163;B4DXP9;F5H3I4	P61163;B4DXP9;F5H3I4	Alpha-centractin	23.0323	23.2511	22.7837	23.0263	23.0626	23.7067	23.5248	23.6166	23.3581
ACTR1B	2		Acetylation;ATP-binding;Completeproteome;Cytoplasm;Cytoskeleton;Directproteinsequencing;Nucleotide-binding;Polymorphism;Referenceproteome		adenyl nucleotide binding;adenyl ribonucleotide binding;ATP binding;binding;nucleotide binding;protein binding;purine nucleotide binding;purine ribonucleoside triphosphate binding;purine ribonucleotide binding;ribonucleotide binding	cell part;centrosome;cytoplasmic part;cytoskeletal part;dynactin complex;intracellular non-membrane-bounded organelle;intracellular organelle;intracellular organelle part;intracellular part;macromolecular complex;microtubule associated complex;microtubule organizing center;non-membrane-bounded organelle;organelle;organelle part;protein complex	4	3	3	2	4	2	0	2	1	1	2	2	17.3	42.293	P42025;G5E9Q5	P42025;G5E9Q5	Beta-centractin	22.6886	21.6262	NaN	NaN	21.6662	NaN	NaN	21.6501	22.5159
ACTR2	4		Acetylation;Actin-binding;ATP-binding;Cellprojection;Completeproteome;Cytoplasm;Cytoskeleton;Directproteinsequencing;Nucleotide-binding;Referenceproteome	cellular component movement;cellular process	actin binding;adenyl nucleotide binding;adenyl ribonucleotide binding;ATP binding;binding;cytoskeletal protein binding;nucleotide binding;protein binding;purine nucleotide binding;purine ribonucleoside triphosphate binding;purine ribonucleotide binding;ribonucleotide binding	Arp2/3 protein complex;cell part;cell projection;cytoplasm;cytoskeletal part;intracellular organelle part;intracellular part;macromolecular complex;organelle part;protein complex	7	7	7	5	6	6	6	6	6	5	5	5	24.8	45.376	E9PF41;P61160;G3V1L8;F5H6T1	E9PF41;P61160;G3V1L8;F5H6T1	Actin-related protein 2	24.0098	23.8764	24.4815	23.6786	23.7266	24.5119	23.9442	24.0725	24.9414
ACTR3	10		Acetylation;Actin-binding;Alternativesplicing;ATP-binding;Cellprojection;Ciliumbiogenesis/degradation;Completeproteome;Cytoplasm;Cytoskeleton;Directproteinsequencing;Nucleotide-binding;Phosphoprotein;Polymorphism;Referenceproteome;Signal	anatomical structure morphogenesis;biological regulation;cell part morphogenesis;cell projection morphogenesis;cell projection organization;cellular component morphogenesis;cellular component movement;cellular component organization;cellular component organization at cellular level;cellular component organization or biogenesis;cellular component organization or biogenesis at cellular level;cellul…	actin binding;adenyl nucleotide binding;adenyl ribonucleotide binding;ATP binding;binding;cytoskeletal protein binding;nucleotide binding;protein binding;purine nucleotide binding;purine ribonucleoside triphosphate binding;purine ribonucleotide binding;ribonucleotide binding	Arp2/3 protein complex;cell part;cell projection;cytoplasm;cytoskeletal part;cytoskeleton;intracellular non-membrane-bounded organelle;intracellular organelle;intracellular organelle part;intracellular part;macromolecular complex;non-membrane-bounded organelle;organelle;organelle part;protein complex	12	12	12	8	10	11	8	8	10	7	7	8	34	47.371	P61158;B4DXW1;F5H3P5;B4DTI0;Q9P1U1;Q9P1U1-3;Q9P1U1-2;C9IZN3;Q9C0K3;H7C4J1	P61158;B4DXW1;F5H3P5;B4DTI0	Actin-related protein 3	25.2824	25.0784	25.0288	25.2872	25.126	25.7777	25.556	25.1438	25.96
ACTR5	1		Coiledcoil;Completeproteome;Cytoplasm;DNAdamage;DNArecombination;DNArepair;Nucleus;Polymorphism;Referenceproteome;Transcription;Transcriptionregulation	biological regulation;biosynthetic process;cellular biosynthetic process;cellular macromolecule biosynthetic process;cellular macromolecule metabolic process;cellular metabolic process;cellular nitrogen compound metabolic process;cellular process;cellular response to stimulus;cellular response to stress;DNA metabolic process;DNA recombination;DNA repair;double-strand break repair;macromolecule bi…	adenyl nucleotide binding;adenyl ribonucleotide binding;ATP binding;binding;nucleotide binding;protein binding;purine nucleotide binding;purine ribonucleoside triphosphate binding;purine ribonucleotide binding;ribonucleotide binding	cell part;chromatin remodeling complex;chromosomal part;cytoplasm;DNA helicase complex;Ino80 complex;intracellular organelle part;intracellular part;macromolecular complex;nuclear chromosome part;nuclear part;organelle part;protein complex	2	2	2	2	2	2	1	2	2	1	2	1	4.3	68.297	Q9H9F9	Q9H9F9	Actin-related protein 5	20.0219	19.5314	18.657	NaN	19.1876	18.9029	NaN	19.14	NaN
ACY1	7	Arginine and proline metabolism	3D-structure;Completeproteome;Cytoplasm;Diseasemutation;Hydrolase;Metal-binding;Polymorphism;Referenceproteome;Zinc	amine metabolic process;carboxylic acid metabolic process;cellular amine metabolic process;cellular amino acid metabolic process;cellular ketone metabolic process;cellular metabolic process;cellular nitrogen compound metabolic process;cellular process;macromolecule metabolic process;metabolic process;nitrogen compound metabolic process;organic acid metabolic process;oxoacid metabolic process;prim…	aminoacylase activity;binding;catalytic activity;cation binding;hydrolase activity;hydrolase activity, acting on carbon-nitrogen (but not peptide) bonds;hydrolase activity, acting on carbon-nitrogen (but not peptide) bonds, in linear amides;ion binding;metal ion binding;metallopeptidase activity;peptidase activity;peptidase activity, acting on L-amino acid peptides	cell part;cytoplasm;cytoplasmic part;cytosol;intracellular part	4	4	4	3	1	2	4	3	1	3	3	2	14.2	45.884	Q03154;C9J9D8;C9JMV9;C9J6I6;C9JWD4;C9JYZ0;F8WC59	Q03154;C9J9D8;C9JMV9;C9J6I6;C9JWD4	Aminoacylase-1	20.7606	NaN	19.7358	21.212	20.8657	NaN	20.3996	20.14	19.9532
ACY3	2	Alanine, aspartate and glutamate metabolism;Histidine metabolism	Cellmembrane;Completeproteome;Cytoplasm;Host-virusinteraction;Hydrolase;Membrane;Metal-binding;Polymorphism;Referenceproteome;Zinc	interspecies interaction between organisms;multi-organism process	binding;catalytic activity;cation binding;hydrolase activity;hydrolase activity, acting on ester bonds;ion binding;metal ion binding	apical plasma membrane;cell part;cytoplasm;intracellular part;membrane part;plasma membrane part	4	4	4	1	0	1	2	1	2	0	0	1	18.8	35.241	Q96HD9;E9PRA7	Q96HD9;E9PRA7	Aspartoacylase-2	NaN	NaN	NaN	19.1542	NaN	20.1149	NaN	NaN	NaN
ADA	4	Primary immunodeficiency;Purine metabolism	3D-structure;Acetylation;Celladhesion;Celljunction;Cellmembrane;Completeproteome;Cytoplasm;Cytoplasmicvesicle;Directproteinsequencing;Diseasemutation;Hereditaryhemolyticanemia;Hydrolase;Membrane;Metal-binding;Nucleotidemetabolism;Polymorphism;Referenceproteome;SCID;Zinc	adenosine catabolic process;adenosine metabolic process;biological adhesion;biological regulation;biosynthetic process;catabolic process;cell activation;cell adhesion;cellular aromatic compound metabolic process;cellular biosynthetic process;cellular catabolic process;cellular metabolic compound salvage;cellular metabolic process;cellular nitrogen compound biosynthetic process;cellular nitrogen c…	adenosine deaminase activity;binding;catalytic activity;cation binding;deaminase activity;hydrolase activity;hydrolase activity, acting on carbon-nitrogen (but not peptide) bonds;hydrolase activity, acting on carbon-nitrogen (but not peptide) bonds, in cyclic amidines;ion binding;metal ion binding;protein binding;transition metal ion binding;zinc ion binding	cell junction;cell part;cytoplasm;cytoplasmic membrane-bounded vesicle lumen;cytoplasmic part;cytoplasmic vesicle part;cytosol;external side of plasma membrane;intracellular membrane-bounded organelle;intracellular organelle;intracellular organelle part;intracellular part;lysosome;lytic vacuole;membrane;membrane part;membrane-bounded organelle;membrane-enclosed lumen;organelle;organelle lumen;org…	11	11	11	5	7	5	7	6	4	5	5	4	37.2	40.764	P00813;F5GWI4;F5GXW0;F5GYD4	P00813;F5GWI4	Adenosine deaminase	23.5602	22.9717	22.4702	23.7499	22.5204	22.5541	23.2897	21.8463	21.3337
ADAM10	2	Alzheimer's disease;Epithelial cell signaling in Helicobacter pylori infection	3D-structure;Cellmembrane;Cleavageonpairofbasicresidues;Completeproteome;Directproteinsequencing;Disulfidebond;Glycoprotein;Hydrolase;Membrane;Metal-binding;Metalloprotease;Notchsignalingpathway;Polymorphism;Protease;Referenceproteome;SH3-binding;Signal;Transmembrane;Transmembranehelix;Zinc;Zymogen	biological regulation;cell activation;cell communication;cell surface receptor linked signaling pathway;cell-cell signaling;cellular macromolecule metabolic process;cellular metabolic process;cellular process;cellular protein metabolic process;cellular response to stimulus;chordate embryonic development;constitutive protein ectodomain proteolysis;developmental process;embryo development;embryo de…	binding;catalytic activity;cation binding;endopeptidase activity;enzyme binding;hydrolase activity;identical protein binding;integrin binding;ion binding;kinase binding;metal ion binding;metalloendopeptidase activity;metallopeptidase activity;peptidase activity;peptidase activity, acting on L-amino acid peptides;protein binding;protein complex binding;protein dimerization activity;protein domain …	cell part;cell surface;cytoplasmic membrane-bounded vesicle;cytoplasmic part;cytoplasmic vesicle;endomembrane system;Golgi apparatus part;Golgi-associated vesicle;integral to membrane;intracellular membrane-bounded organelle;intracellular organelle;intracellular organelle part;intracellular part;intrinsic to membrane;membrane;membrane part;membrane-bounded organelle;membrane-bounded vesicle;nucle…	2	2	2	1	1	2	1	0	2	2	1	1	3.6	84.141	O14672;A8MY20	O14672;A8MY20	Disintegrin and metalloproteinase domain-containing protein 10	NaN	NaN	19.4455	NaN	NaN	19.4431	21.133	NaN	NaN
ADAR	7	Cytosolic DNA-sensing pathway;Measles	3D-structure;Alternativepromoterusage;Alternativesplicing;Completeproteome;Cytoplasm;Directproteinsequencing;Diseasemutation;DNA-binding;Hydrolase;Isopeptidebond;Metal-binding;mRNAprocessing;Nucleus;Phosphoprotein;Polymorphism;Referenceproteome;Repeat;RNA-binding;RNA-mediatedgenesilencing;Ublconjugation;Zinc	adenosine to inosine editing;base conversion or substitution editing;biological regulation;cell surface receptor linked signaling pathway;cellular macromolecule metabolic process;cellular metabolic process;cellular nitrogen compound metabolic process;cellular process;cellular response to chemical stimulus;cellular response to cytokine stimulus;cellular response to organic substance;cellular respo…	adenosine deaminase activity;binding;catalytic activity;cation binding;deaminase activity;DNA binding;double-stranded RNA adenosine deaminase activity;double-stranded RNA binding;hydrolase activity;hydrolase activity, acting on carbon-nitrogen (but not peptide) bonds;hydrolase activity, acting on carbon-nitrogen (but not peptide) bonds, in cyclic amidines;ion binding;metal ion binding;nucleic aci…	cell part;cytoplasm;intracellular membrane-bounded organelle;intracellular non-membrane-bounded organelle;intracellular organelle;intracellular organelle part;intracellular part;membrane-bounded organelle;non-membrane-bounded organelle;nuclear part;nucleolus;nucleoplasm;nucleus;organelle;organelle part	11	11	11	5	6	7	5	4	6	3	3	4	11.2	140.83	E7ENU4;P55265-4;P55265;P55265-5;P55265-2;H0YCK3;P55265-3	E7ENU4;P55265-4;P55265;P55265-5;P55265-2;H0YCK3;P55265-3	Double-stranded RNA-specific adenosine deaminase	21.828	21.3789	21.8751	21.8705	21.7282	21.8706	21.8562	21.6571	21.7713
ADCK3;CABC1	8		Alternativesplicing;ATP-binding;Chaperone;Completeproteome;Diseasemutation;Kinase;Mitochondrion;Neurodegeneration;Nucleotide-binding;Polymorphism;Referenceproteome;Serine/threonine-proteinkinase;Transferase;Transitpeptide	cell death;cellular process;death	adenyl nucleotide binding;adenyl ribonucleotide binding;ATP binding;binding;catalytic activity;kinase activity;nucleotide binding;phosphotransferase activity, alcohol group as acceptor;protein kinase activity;protein serine/threonine kinase activity;purine nucleotide binding;purine ribonucleoside triphosphate binding;purine ribonucleotide binding;ribonucleotide binding;transferase activity;transf…	cell part;cytoplasmic part;intracellular membrane-bounded organelle;intracellular organelle;intracellular part;membrane-bounded organelle;mitochondrion;organelle	5	5	5	4	4	2	4	4	3	4	3	3	10.5	71.949	Q8NI60;Q5T7A4;Q8NI60-3;Q5T7A2;B4DED1;Q8NI60-4;E7EVZ8;Q8NI60-2	Q8NI60;Q5T7A4;Q8NI60-3	Chaperone activity of bc1 complex-like, mitochondrial	20.9435	19.9913	20.366	20.7219	20.2223	20.666	20.6539	20.3769	20.3396
ADD1	17		Acetylation;Actin-binding;Alternativesplicing;Calmodulin-binding;Cellmembrane;Completeproteome;Cytoplasm;Cytoskeleton;Directproteinsequencing;Membrane;Phosphoprotein;Polymorphism;Referenceproteome	actin cytoskeleton organization;actin filament bundle assembly;actin filament capping;actin filament organization;actin filament-based process;activation of signaling protein activity involved in unfolded protein response;barbed-end actin filament capping;biological regulation;cellular component assembly;cellular component assembly at cellular level;cellular component disassembly;cellular compone…	actin binding;actin filament binding;binding;calmodulin binding;cation binding;cytoskeletal protein binding;identical protein binding;ion binding;metal ion binding;protein binding;protein dimerization activity;protein heterodimerization activity;protein homodimerization activity;spectrin binding;transcription factor binding	cell part;cytoplasm;cytoplasmic part;cytoskeletal part;cytosol;F-actin capping protein complex;intracellular membrane-bounded organelle;intracellular organelle;intracellular organelle part;intracellular part;macromolecular complex;membrane;membrane-bounded organelle;nucleus;organelle;organelle part;plasma membrane;protein complex	8	8	8	4	2	5	4	4	3	3	3	4	13.8	84.302	P35611-3;P35611;E7ENY0;A2A3N8;E7EV99;P35611-2;Q86XM2;Q96D30;H0Y9H2;D6RF25;D6RAH3;D6RJE2;P35612;P35612-3;P35612-4;P35612-8;P35612-2	P35611-3;P35611;E7ENY0;A2A3N8;E7EV99;P35611-2;Q86XM2;Q96D30;H0Y9H2	Alpha-adducin	23.0617	NaN	22.2558	22.4348	21.77	21.4529	22.7798	21.8735	22.3931
ADD3	2		Actin-binding;Alternativesplicing;Calmodulin-binding;Cellmembrane;Completeproteome;Cytoplasm;Cytoskeleton;Membrane;Phosphoprotein;Referenceproteome;Ublconjugation		actin binding;binding;calmodulin binding;cation binding;cytoskeletal protein binding;ion binding;metal ion binding;protein binding;structural constituent of cytoskeleton;structural molecule activity	cell part;cytoskeleton;intracellular non-membrane-bounded organelle;intracellular organelle;intracellular part;membrane;non-membrane-bounded organelle;organelle;plasma membrane	8	8	8	5	4	4	4	3	3	6	3	4	15.7	79.154	Q9UEY8;Q9UEY8-2	Q9UEY8;Q9UEY8-2	Gamma-adducin	22.4049	19.9993	21.9098	21.7371	20.7142	20.1415	22.6412	20.9125	21.5465
ADH5	5	Chloroalkane and chloroalkene degradation;Drug metabolism - cytochrome P450;Fatty acid metabolism;Glycolysis / Gluconeogenesis;Metabolism of xenobiotics by cytochrome P450;Methane metabolism;Naphthalene degradation;Retinol metabolism;Tyrosine metabolism	3D-structure;Acetylation;Completeproteome;Cytoplasm;Directproteinsequencing;Metal-binding;NAD;Oxidoreductase;Polymorphism;Referenceproteome;Zinc	alcohol metabolic process;ethanol metabolic process;ethanol oxidation;metabolic process;oxidation-reduction process;primary alcohol metabolic process;response to chemical stimulus;response to redox state;response to stimulus;small molecule metabolic process	alcohol dehydrogenase (NAD) activity;binding;carboxylic acid binding;catalytic activity;cation binding;electron carrier activity;fatty acid binding;formaldehyde dehydrogenase activity;ion binding;lipid binding;metal ion binding;monocarboxylic acid binding;nucleotide binding;oxidoreductase activity;oxidoreductase activity, acting on CH-OH group of donors;oxidoreductase activity, acting on the alde…		8	8	8	3	5	4	7	4	4	5	3	3	17.9	39.724	P11766;H0YAG8;D6RFE4;D6R9G2;D6RAY0	P11766;H0YAG8	Alcohol dehydrogenase class-3	23.8937	22.4826	21.9752	23.7804	23.753	22.6171	23.9887	22.6857	22.8054
ADI1	2	Cysteine and methionine metabolism	Alternativesplicing;Amino-acidbiosynthesis;Cellmembrane;Completeproteome;Cytoplasm;Dioxygenase;Directproteinsequencing;Iron;Membrane;Metal-binding;Methioninebiosynthesis;Nucleus;Oxidoreductase;Referenceproteome	amine biosynthetic process;amine metabolic process;amino acid salvage;aspartate family amino acid biosynthetic process;aspartate family amino acid metabolic process;biosynthetic process;carboxylic acid biosynthetic process;carboxylic acid metabolic process;cellular amine metabolic process;cellular amino acid biosynthetic process;cellular amino acid metabolic process;cellular biogenic amine metabo…	acireductone dioxygenase [iron(II)-requiring] activity;binding;catalytic activity;cation binding;dioxygenase activity;ion binding;metal ion binding;oxidoreductase activity;oxidoreductase activity, acting on single donors with incorporation of molecular oxygen;oxidoreductase activity, acting on single donors with incorporation of molecular oxygen, incorporation of two atoms of oxygen;protein bindi…	cell part;cytoplasmic part;cytosol;Golgi apparatus;intracellular membrane-bounded organelle;intracellular organelle;intracellular part;membrane;membrane-bounded organelle;nucleus;organelle;plasma membrane	3	3	3	1	2	3	1	2	3	1	1	1	21.8	21.498	Q9BV57;Q9BV57-2	Q9BV57;Q9BV57-2	1,2-dihydroxy-3-keto-5-methylthiopentene dioxygenase	NaN	19.2811	20.498	NaN	19.8354	20.208	NaN	NaN	NaN
ADK	4	Purine metabolism	3D-structure;Acetylation;Alternativesplicing;ATP-binding;Completeproteome;Directproteinsequencing;Diseasemutation;Kinase;Magnesium;Metal-binding;Nucleotide-binding;Phosphoprotein;Purinesalvage;Referenceproteome;Transferase	biosynthetic process;cellular aromatic compound metabolic process;cellular biosynthetic process;cellular metabolic compound salvage;cellular metabolic process;cellular nitrogen compound biosynthetic process;cellular nitrogen compound metabolic process;cellular process;heterocycle biosynthetic process;heterocycle metabolic process;metabolic process;nitrogen compound metabolic process;nucleobase me…	adenosine kinase activity;adenyl nucleotide binding;adenyl ribonucleotide binding;ATP binding;binding;catalytic activity;cation binding;ion binding;kinase activity;metal ion binding;nucleobase-containing compound kinase activity;nucleoside kinase activity;nucleotide binding;phosphotransferase activity, alcohol group as acceptor;purine nucleotide binding;purine ribonucleoside triphosphate binding;…	cell part;cytoplasmic part;cytosol;intracellular part	8	8	8	3	4	5	5	5	6	5	5	6	34.3	40.545	P55263;P55263-2;P55263-3;B7Z800	P55263;P55263-2;P55263-3;B7Z800	Adenosine kinase	22.3203	22.9584	23.1358	22.4949	22.7239	23.4135	22.3571	22.8588	23.7302
ADNP	2		Acetylation;Completeproteome;DNA-binding;Homeobox;Metal-binding;Nucleus;Phosphoprotein;Referenceproteome;Repeat;Transcription;Transcriptionregulation;Zinc;Zinc-finger	biosynthetic process;cellular biosynthetic process;cellular macromolecule biosynthetic process;cellular macromolecule metabolic process;cellular metabolic process;cellular nitrogen compound metabolic process;cellular process;macromolecule biosynthetic process;macromolecule metabolic process;metabolic process;nitrogen compound metabolic process;nucleic acid metabolic process;nucleobase-containing …	binding;cation binding;DNA binding;ion binding;metal ion binding;nucleic acid binding;nucleic acid binding transcription factor activity;sequence-specific DNA binding;sequence-specific DNA binding transcription factor activity;transition metal ion binding;zinc ion binding	cell part;intracellular membrane-bounded organelle;intracellular organelle;intracellular part;membrane-bounded organelle;nucleus;organelle	8	8	8	4	7	6	2	2	3	3	3	2	11	123.56	Q9H2P0;E9PQK8	Q9H2P0	Activity-dependent neuroprotector homeobox protein	21.4714	20.5495	20.3897	NaN	20.9886	20.5417	20.3189	20.019	20.2388
ADPRHL2	3		3D-structure;Completeproteome;Cytoplasm;Hydrolase;Magnesium;Metal-binding;Nucleus;Polymorphism;Referenceproteome		binding;catalytic activity;cation binding;hydrolase activity;hydrolase activity, acting on glycosyl bonds;hydrolase activity, hydrolyzing O-glycosyl compounds;ion binding;metal ion binding;poly(ADP-ribose) glycohydrolase activity	cell part;cytoplasm;intracellular membrane-bounded organelle;intracellular organelle;intracellular part;membrane-bounded organelle;nucleus;organelle	8	8	8	4	7	6	6	4	5	6	5	5	29.2	38.946	Q9NX46;B4DHV5;B7ZAN4	Q9NX46;B4DHV5	Poly(ADP-ribose) glycohydrolase ARH3	22.1466	21.7036	21.3971	22.2649	21.2751	20.9987	21.8943	21.2067	21.3461
ADRBK1	4	Chemokine signaling pathway;Endocytosis;Phototransduction - fly	3D-structure;Acetylation;ATP-binding;Completeproteome;Kinase;Nucleotide-binding;Phosphoprotein;Polymorphism;Referenceproteome;Serine/threonine-proteinkinase;Transferase	activation of phospholipase C activity;adaptation of signaling pathway;biological regulation;cardiac muscle contraction;cell surface receptor linked signaling pathway;cellular component organization;cellular component organization or biogenesis;cellular macromolecule metabolic process;cellular membrane organization;cellular metabolic process;cellular process;cellular protein metabolic process;cel…	adenyl nucleotide binding;adenyl ribonucleotide binding;adrenergic receptor binding;alpha-2A adrenergic receptor binding;ATP binding;beta-adrenergic receptor kinase activity;binding;catalytic activity;Edg-2 lysophosphatidic acid receptor binding;endothelial differentiation G-protein coupled receptor binding;G-protein coupled receptor kinase activity;G-protein-coupled receptor binding;kinase activ…	cell fraction;cell part;cytoplasmic part;cytosol;intracellular part;soluble fraction	8	8	8	6	6	6	5	5	5	5	6	6	13.6	79.573	P25098;P35626;E9PRV7;Q8N433	P25098	Beta-adrenergic receptor kinase 1	22.5788	21.9217	22.6522	21.8079	21.9468	22.3831	21.9405	22.4436	22.3309
ADSL	6	Alanine, aspartate and glutamate metabolism;Purine metabolism	3D-structure;Acetylation;Alternativesplicing;Completeproteome;Directproteinsequencing;Diseasemutation;Epilepsy;Lyase;Phosphoprotein;Purinebiosynthesis;Referenceproteome	AMP biosynthetic process;AMP metabolic process;biosynthetic process;cellular aromatic compound metabolic process;cellular biosynthetic process;cellular component assembly;cellular component organization;cellular component organization or biogenesis;cellular metabolic process;cellular nitrogen compound biosynthetic process;cellular nitrogen compound metabolic process;cellular process;heterocycle b…	(S)-2-(5-amino-1-(5-phospho-D-ribosyl)imidazole-4-carboxamido)succinate AMP-lyase (fumarate-forming) activity;amidine-lyase activity;carbon-nitrogen lyase activity;catalytic activity;lyase activity;N6-(1,2-dicarboxyethyl)AMP AMP-lyase (fumarate-forming) activity	cell part;cytoplasm;cytoplasmic part;cytosol;intracellular part	6	6	6	3	5	5	3	4	4	3	4	4	16.3	54.889	P30566;E7ERF4;P30566-2;B4DUM2;B0QY75;B4DEP1	P30566;E7ERF4;P30566-2;B4DUM2	Adenylosuccinate lyase	22.49	22.6359	22.1765	21.9746	22.5437	22.6924	22.1661	22.6398	22.7627
ADSS	2	Alanine, aspartate and glutamate metabolism;Purine metabolism	3D-structure;Acetylation;Completeproteome;Cytoplasm;GTP-binding;Ligase;Magnesium;Metal-binding;Nucleotide-binding;Polymorphism;Purinebiosynthesis;Referenceproteome	AMP biosynthetic process;AMP metabolic process;biosynthetic process;cellular aromatic compound metabolic process;cellular biosynthetic process;cellular metabolic process;cellular nitrogen compound biosynthetic process;cellular nitrogen compound metabolic process;cellular process;heterocycle biosynthetic process;heterocycle metabolic process;immune system process;metabolic process;nitrogen compoun…	adenylosuccinate synthase activity;anion binding;binding;catalytic activity;cation binding;GTP binding;guanyl nucleotide binding;guanyl ribonucleotide binding;ion binding;ligase activity;ligase activity, forming carbon-nitrogen bonds;magnesium ion binding;metal ion binding;nucleotide binding;phosphate ion binding;purine nucleotide binding;purine ribonucleoside triphosphate binding;purine ribonucl…	cell part;cytoplasm;cytoplasmic part;cytosol;intracellular part;membrane;plasma membrane	8	8	8	2	6	2	2	6	5	4	6	4	25.4	50.097	P30520;F8W9D6	P30520;F8W9D6	Adenylosuccinate synthetase isozyme 2;Adenylosuccinate synthetase	NaN	23.5365	22.3	22.1181	23.6306	23.1961	22.622	23.1608	22.7141
AFG3L2	2		3D-structure;Acetylation;ATP-binding;Completeproteome;Diseasemutation;Hydrolase;Membrane;Metal-binding;Metalloprotease;Mitochondrion;Neurodegeneration;Nucleotide-binding;Protease;Referenceproteome;Spinocerebellarataxia;Transmembrane;Transmembranehelix;Zinc	catabolic process;cell death;cellular process;death;macromolecule catabolic process;macromolecule metabolic process;metabolic process;primary metabolic process;protein catabolic process;protein metabolic process;proteolysis	adenyl nucleotide binding;adenyl ribonucleotide binding;ATP binding;binding;catalytic activity;cation binding;endopeptidase activity;hydrolase activity;hydrolase activity, acting on acid anhydrides;hydrolase activity, acting on acid anhydrides, in phosphorus-containing anhydrides;ion binding;metal ion binding;metalloendopeptidase activity;metallopeptidase activity;nucleoside-triphosphatase activi…	cell part;cytoplasmic part;integral to membrane;intracellular membrane-bounded organelle;intracellular organelle;intracellular part;intrinsic to membrane;membrane part;membrane-bounded organelle;mitochondrion;organelle	5	5	5	5	2	1	4	3	5	2	3	3	6.3	90.193	Q8TA92;Q9Y4W6	Q8TA92;Q9Y4W6	AFG3-like protein 2	21.8943	19.6895	NaN	21.2975	19.8364	21.3585	20.543	19.9725	20.798
AFM	1		Completeproteome;Directproteinsequencing;Disulfidebond;Glycoprotein;Polymorphism;Referenceproteome;Repeat;Secreted;Signal;Transport	establishment of localization;transport;vitamin transport	binding;vitamin binding;vitamin E binding	extracellular region part;extracellular space	9	9	8	6	1	1	6	2	0	5	1	0	17.7	69.068	P43652	P43652	Afamin	24.0252	NaN	NaN	26.366	21.5032	NaN	25.916	NaN	NaN
AGAP2	2	Endocytosis	3D-structure;Alternativesplicing;ANKrepeat;Completeproteome;Cytoplasm;GTPaseactivation;GTP-binding;Metal-binding;Nucleotide-binding;Nucleus;Phosphoprotein;Polymorphism;Proteintransport;Referenceproteome;Repeat;Transport;Tumorsuppressor;Zinc;Zinc-finger	axon guidance;biological regulation;cellular process;cellular response to stimulus;chemotaxis;establishment of localization;establishment of protein localization;intracellular signal transduction;locomotion;negative regulation of apoptosis;negative regulation of biological process;negative regulation of catabolic process;negative regulation of cell death;negative regulation of cellular process;ne…	ARF GTPase activator activity;binding;cation binding;enzyme activator activity;enzyme regulator activity;GTP binding;GTPase activator activity;GTPase regulator activity;guanyl nucleotide binding;guanyl ribonucleotide binding;ion binding;metal ion binding;nucleoside-triphosphatase regulator activity;nucleotide binding;purine nucleotide binding;purine ribonucleoside triphosphate binding;purine ribo…	cell part;cytoplasmic part;intracellular membrane-bounded organelle;intracellular non-membrane-bounded organelle;intracellular organelle;intracellular organelle part;intracellular part;membrane-bounded organelle;mitochondrion;non-membrane-bounded organelle;nuclear part;nucleolus;organelle;organelle part	3	1	1	1	2	1	2	1	0	2	0	2	2.8	124.59	F8VVT9;Q99490	F8VVT9;Q99490	Arf-GAP with GTPase, ANK repeat and PH domain-containing protein 2	NaN	NaN	NaN	NaN	NaN	NaN	NaN	NaN	19.1514
AGFG1	7		3D-structure;Alternativesplicing;Completeproteome;Cytoplasmicvesicle;Developmentalprotein;Differentiation;DNA-binding;Glycoprotein;Metal-binding;mRNAtransport;Nucleus;Phosphoprotein;Referenceproteome;Repeat;Spermatogenesis;Transport;Zinc;Zinc-finger	biological regulation;cell differentiation;cellular developmental process;cellular process;developmental process;establishment of localization;establishment of localization in cell;establishment of RNA localization;gamete generation;intracellular transport;male gamete generation;mRNA export from nucleus;mRNA transport;multicellular organismal development;multicellular organismal process;multicell…	ARF GTPase activator activity;binding;cation binding;DNA binding;enzyme activator activity;enzyme regulator activity;GTPase activator activity;GTPase regulator activity;ion binding;metal ion binding;nucleic acid binding;nucleoside-triphosphatase regulator activity;protein binding;RNA binding;small GTPase regulator activity;transition metal ion binding;zinc ion binding	cell part;cytoplasmic membrane-bounded vesicle;cytoplasmic part;cytoplasmic vesicle;Golgi apparatus;intracellular membrane-bounded organelle;intracellular organelle;intracellular organelle part;intracellular part;macromolecular complex;membrane part;membrane-bounded organelle;membrane-bounded vesicle;nuclear part;nuclear pore;organelle;organelle part;pore complex;protein complex;vesicle	5	5	5	3	3	3	2	3	4	2	3	3	17	60.766	E9PHX7;F5GYJ2;P52594;P52594-3;P52594-2;B8ZZY2;C9J2I0	E9PHX7;F5GYJ2;P52594;P52594-3;P52594-2;B8ZZY2	Arf-GAP domain and FG repeat-containing protein 1	21.1059	20.3734	20.15	20.8819	20.2142	19.6244	20.8666	20.4829	20.2976
AGK	3	Glycerolipid metabolism	Acetylation;Alternativesplicing;ATP-binding;Completeproteome;Kinase;Membrane;Mitochondrion;Nucleotide-binding;Polymorphism;Referenceproteome;Transferase;Transitpeptide	activation of protein kinase activity;activation of protein kinase C activity by G-protein coupled receptor protein signaling pathway;biological regulation;cell surface receptor linked signaling pathway;cellular process;cellular response to stimulus;G-protein coupled receptor protein signaling pathway;positive regulation of catalytic activity;positive regulation of kinase activity;positive regula…	acylglycerol kinase activity;adenyl nucleotide binding;adenyl ribonucleotide binding;ATP binding;binding;catalytic activity;diacylglycerol kinase activity;kinase activity;NAD+ kinase activity;nucleotide binding;phosphotransferase activity, alcohol group as acceptor;purine nucleotide binding;purine ribonucleoside triphosphate binding;purine ribonucleotide binding;ribonucleotide binding;transferase…	cell part;cytoplasmic part;intracellular organelle part;intracellular part;membrane;mitochondrial membrane;mitochondrial part;organelle membrane;organelle part	3	3	3	1	3	2	2	3	3	3	2	3	10.9	47.137	Q53H12;E9PC15;E9PG39	Q53H12;E9PC15;E9PG39	Acylglycerol kinase, mitochondrial	NaN	20.5051	20.76	21.9272	20.3012	21.732	21.2672	20.5649	20.6076
AGL	3	Starch and sucrose metabolism	Alternativesplicing;Completeproteome;Cytoplasm;Directproteinsequencing;Diseasemutation;Glycogenbiosynthesis;Glycogenstoragedisease;Glycosidase;Glycosyltransferase;Hydrolase;Multifunctionalenzyme;Phosphoprotein;Polymorphism;Referenceproteome;Transferase;Ublconjugation	alcohol metabolic process;biosynthetic process;carbohydrate biosynthetic process;carbohydrate catabolic process;carbohydrate metabolic process;catabolic process;cellular biosynthetic process;cellular carbohydrate biosynthetic process;cellular carbohydrate catabolic process;cellular carbohydrate metabolic process;cellular glucan metabolic process;cellular macromolecule biosynthetic process;cellula…	4-alpha-glucanotransferase activity;alpha-glucosidase activity;amylo-alpha-1,6-glucosidase activity;binding;catalytic activity;cation binding;glucosidase activity;glycogen debranching enzyme activity;hydrolase activity;hydrolase activity, acting on glycosyl bonds;hydrolase activity, hydrolyzing O-glycosyl compounds;ion binding;transferase activity;transferase activity, transferring glycosyl group…	cell part;cytoplasmic part;cytosol;intracellular membrane-bounded organelle;intracellular organelle;intracellular part;isoamylase complex;macromolecular complex;membrane-bounded organelle;nucleus;organelle;protein complex	5	5	5	3	3	2	0	1	1	1	1	2	3.5	174.76	P35573;P35573-3;P35573-2	P35573;P35573-3;P35573-2	Glycogen debranching enzyme;4-alpha-glucanotransferase;Amylo-alpha-1,6-glucosidase	22.7992	23.2518	22.9461	NaN	NaN	NaN	NaN	NaN	NaN
AGPS	3	Ether lipid metabolism;Peroxisome	Acetylation;Cataract;Completeproteome;Diseasemutation;Dwarfism;FAD;Flavoprotein;Lipidsynthesis;Membrane;Peroxisome;Phosphoprotein;Referenceproteome;Rhizomelicchondrodysplasiapunctata;Transferase;Transitpeptide	biosynthetic process;cellular biosynthetic process;cellular lipid metabolic process;cellular metabolic process;cellular process;ether lipid biosynthetic process;ether lipid metabolic process;glycerol ether biosynthetic process;glycerol ether metabolic process;glycerolipid biosynthetic process;glycerolipid metabolic process;lipid biosynthetic process;lipid metabolic process;metabolic process;organ…	alkylglycerone-phosphate synthase activity;binding;catalytic activity;coenzyme binding;cofactor binding;flavin adenine dinucleotide binding;oxidoreductase activity;oxidoreductase activity, acting on CH-OH group of donors;oxidoreductase activity, acting on the CH-OH group of donors, NAD or NADP as acceptor;transferase activity;transferase activity, transferring alkyl or aryl (other than methyl) gr…	cell part;cytoplasmic part;intracellular membrane-bounded organelle;intracellular non-membrane-bounded organelle;intracellular organelle;intracellular organelle lumen;intracellular organelle part;intracellular part;membrane;membrane-bounded organelle;membrane-enclosed lumen;microbody;microbody lumen;microbody membrane;microbody part;non-membrane-bounded organelle;nuclear part;nucleolus;organelle;…	9	9	9	6	7	7	2	6	7	6	8	6	19.9	72.911	O00116;B8ZZ81;F5H632	O00116;B8ZZ81	Alkyldihydroxyacetonephosphate synthase, peroxisomal	22.5444	22.598	22.98	22.3427	21.6976	22.945	21.9446	22.8853	22.8529
AGT	2	Hypertrophic cardiomyopathy (HCM);Renin-angiotensin system;Vascular smooth muscle contraction	3D-structure;Completeproteome;Directproteinsequencing;Diseasemutation;Disulfidebond;Glycoprotein;Polymorphism;Referenceproteome;Secreted;Signal;Vasoactive;Vasoconstrictor	activation of phospholipase C activity;activation of phospholipase C activity by G-protein coupled receptor protein signaling pathway coupled to IP3 second messenger;anatomical structure development;biological regulation;blood vessel remodeling;cell communication;cell surface receptor linked signaling pathway;cell-cell signaling;cellular component organization;cellular component organization or b…	acetyltransferase activator activity;angiotensin receptor binding;binding;endopeptidase inhibitor activity;endopeptidase regulator activity;enzyme activator activity;enzyme inhibitor activity;enzyme regulator activity;G-protein-coupled receptor binding;growth factor activity;hormone activity;peptidase inhibitor activity;peptidase regulator activity;protein binding;receptor binding;serine-type end…	cell fraction;cell part;extracellular region part;extracellular space;soluble fraction	4	4	4	3	0	0	4	0	0	4	0	0	11.1	53.154	P01019;E7EUC5	P01019;E7EUC5	Angiotensinogen;Angiotensin-1;Angiotensin-2;Angiotensin-3	20.7957	NaN	NaN	23.2627	NaN	NaN	22.829	NaN	NaN
AGTRAP	2		Alternativesplicing;Completeproteome;Cytoplasmicvesicle;Endoplasmicreticulum;Golgiapparatus;Membrane;Polymorphism;Referenceproteome;Transmembrane;Transmembranehelix		binding;protein binding	cell part;cytoplasmic part;cytoplasmic vesicle membrane;cytoplasmic vesicle part;endoplasmic reticulum membrane;endoplasmic reticulum part;Golgi apparatus part;Golgi membrane;integral to membrane;intracellular organelle part;intracellular part;intrinsic to membrane;membrane;membrane part;organelle membrane;organelle part;vesicle membrane	2	2	2	2	2	2	2	1	2	1	0	2	24.5	17.419	Q6RW13;Q6RW13-2	Q6RW13;Q6RW13-2	Type-1 angiotensin II receptor-associated protein	20.0374	19.7668	19.8677	19.6806	NaN	20.3178	NaN	NaN	NaN
AHCY	2	Cysteine and methionine metabolism	3D-structure;Acetylation;Completeproteome;Cytoplasm;Directproteinsequencing;Diseasemutation;Hydrolase;NAD;One-carbonmetabolism;Polymorphism;Referenceproteome	amine metabolic process;carboxylic acid metabolic process;cellular amine metabolic process;cellular amino acid metabolic process;cellular ketone metabolic process;cellular metabolic process;cellular nitrogen compound metabolic process;cellular process;metabolic process;methylation;nitrogen compound metabolic process;one-carbon metabolic process;organic acid metabolic process;oxoacid metabolic pro…	adenosylhomocysteinase activity;catalytic activity;hydrolase activity;hydrolase activity, acting on ether bonds;trialkylsulfonium hydrolase activity	cell part;cytoplasmic membrane-bounded vesicle;cytoplasmic part;cytoplasmic vesicle;cytosol;intracellular membrane-bounded organelle;intracellular organelle;intracellular part;melanosome;membrane-bounded organelle;membrane-bounded vesicle;organelle;pigment granule;vesicle	15	15	15	9	13	12	11	11	12	10	9	12	35.2	47.716	P23526;F5H737	P23526;F5H737	Adenosylhomocysteinase	25.0753	25.6684	25.3842	25.4223	26.2443	25.837	25.2655	25.888	25.8149
AHCYL1	2	Cysteine and methionine metabolism	3D-structure;Alternativesplicing;Completeproteome;Endoplasmicreticulum;Hydrolase;NAD;One-carbonmetabolism;Phosphoprotein;Referenceproteome	cellular metabolic process;cellular process;metabolic process;one-carbon metabolic process;small molecule metabolic process	adenosylhomocysteinase activity;catalytic activity;hydrolase activity;hydrolase activity, acting on ether bonds;trialkylsulfonium hydrolase activity	cell part;cytoplasmic part;endoplasmic reticulum;intracellular membrane-bounded organelle;intracellular organelle;intracellular part;membrane-bounded organelle;organelle	8	8	6	4	5	5	3	3	3	4	5	4	16.4	58.951	O43865;O43865-2	O43865;O43865-2	Putative adenosylhomocysteinase 2	22.0231	22.3188	21.9582	21.7591	22.4086	22.2525	22.2008	22.165	22.629
AHCYL2	8	Cysteine and methionine metabolism	3D-structure;Alternativesplicing;Completeproteome;Hydrolase;NAD;One-carbonmetabolism;Phosphoprotein;Referenceproteome	cellular metabolic process;cellular process;metabolic process;one-carbon metabolic process;small molecule metabolic process	adenosylhomocysteinase activity;catalytic activity;hydrolase activity;hydrolase activity, acting on ether bonds;trialkylsulfonium hydrolase activity		5	3	3	4	2	4	3	3	3	3	3	2	11.3	66.72	Q96HN2;Q96HN2-2;F8W7N8;H0Y8B3;D7UEQ7;D9N155;Q96HN2-3;C9K0S0	Q96HN2;Q96HN2-2;F8W7N8;H0Y8B3;D7UEQ7;D9N155;Q96HN2-3	Putative adenosylhomocysteinase 3;Adenosylhomocysteinase	22.1091	NaN	19.3578	19.6762	19.3172	NaN	21.0113	19.6102	NaN
AHNAK	9		Acetylation;Completeproteome;Nucleus;Phosphoprotein;Polymorphism;Referenceproteome;Repeat;Viralnucleoprotein	anatomical structure development;developmental process;nervous system development;system development	binding;nucleic acid binding;protein binding	cell part;intracellular membrane-bounded organelle;intracellular organelle;intracellular part;membrane-bounded organelle;nucleus;organelle	161	161	161	100	69	140	70	23	81	79	26	88	49.8	629.09	Q09666;Q8N274;E9PLZ1;A1A586;E9PLK4;E9PJC6;E9PKR9;E9PJZ0;E9PQE3	Q09666	Neuroblast differentiation-associated protein AHNAK	28.037	25.468	28.2006	26.6016	24.6373	26.4289	26.9355	24.4106	27.0708
AHSA1	7		3D-structure;Acetylation;Chaperone;Completeproteome;Cytoplasm;Endoplasmicreticulum;Referenceproteome;Stressresponse	cellular macromolecule metabolic process;cellular metabolic process;cellular process;cellular protein metabolic process;macromolecule metabolic process;metabolic process;primary metabolic process;protein folding;protein metabolic process;response to stimulus;response to stress	ATPase activator activity;ATPase regulator activity;binding;chaperone binding;enzyme activator activity;enzyme regulator activity;nucleoside-triphosphatase regulator activity;protein binding	cell part;cytoplasmic part;cytosol;endoplasmic reticulum;intracellular membrane-bounded organelle;intracellular organelle;intracellular part;membrane-bounded organelle;organelle	7	7	7	4	6	5	5	4	5	3	4	3	36.1	38.274	O95433;B4DUR9;H0YJG7;G3V438;H0YJU2;H0YJ63;H0YJG6	O95433;B4DUR9;H0YJG7;G3V438;H0YJU2	Activator of 90 kDa heat shock protein ATPase homolog 1	23.018	23.8165	22.9161	23.0272	23.9882	23.3453	22.6873	24.0293	23.766
AIFM1;PDCD8	7	Apoptosis;Glutathione metabolism	3D-structure;Acetylation;Alternativesplicing;Apoptosis;Completeproteome;Cytoplasm;Directproteinsequencing;Diseasemutation;DNA-binding;FAD;Flavoprotein;Isopeptidebond;Membrane;Mitochondrion;Mitochondrioninnermembrane;Nucleus;Oxidoreductase;Phosphoprotein;Referenceproteome;Transitpeptide;Ublconjugation	activation of caspase activity;apoptosis;apoptosis in response to endoplasmic reticulum stress;biological regulation;catabolic process;cell death;cell redox homeostasis;cellular catabolic process;cellular homeostasis;cellular macromolecule catabolic process;cellular macromolecule metabolic process;cellular metabolic process;cellular nitrogen compound metabolic process;cellular process;death;DNA c…	binding;catalytic activity;coenzyme binding;cofactor binding;DNA binding;electron carrier activity;flavin adenine dinucleotide binding;nucleic acid binding;oxidoreductase activity;protein binding	cell part;cytoplasmic part;cytosol;intracellular membrane-bounded organelle;intracellular organelle;intracellular organelle part;intracellular part;membrane;membrane-bounded organelle;membrane-enclosed lumen;mitochondrial inner membrane;mitochondrial intermembrane space;mitochondrial membrane;mitochondrial part;nucleus;organelle;organelle envelope lumen;organelle inner membrane;organelle membrane…	13	13	13	6	10	7	6	6	7	6	6	7	28.9	66.9	O95831;O95831-3;O95831-4;Q1L6K4;O95831-2;E9PMA0;Q2QKE4	O95831;O95831-3;O95831-4;Q1L6K4	Apoptosis-inducing factor 1, mitochondrial	23.9269	23.2172	23.9634	23.6515	23.6419	24.2526	23.6146	23.4105	24.0239
AIM1	4		3D-structure;Completeproteome;Lectin;Phosphoprotein;Polymorphism;Referenceproteome;Repeat		binding;carbohydrate binding;sugar binding		8	8	8	2	4	5	1	1	3	1	2	3	6.4	188.67	Q9Y4K1;B4DU04;F5H7N3;Q96QW7	Q9Y4K1	Absent in melanoma 1 protein	NaN	19.2317	20.3432	NaN	NaN	20.7472	NaN	18.3265	20.4382
AIMP1	4		3D-structure;Acetylation;Alternativesplicing;Angiogenesis;Apoptosis;Carbohydratemetabolism;Celladhesion;Completeproteome;Cytokine;Cytoplasm;Cytoplasmicvesicle;Endoplasmicreticulum;Glucosemetabolism;Golgiapparatus;Inflammatoryresponse;Leukodystrophy;Nucleus;Polymorphism;Proteinbiosynthesis;Referenceproteome;RNA-binding;Secreted;tRNA-binding	alcohol metabolic process;amine metabolic process;amino acid activation;anatomical structure formation involved in morphogenesis;angiogenesis;apoptosis;biological adhesion;biological regulation;carbohydrate metabolic process;carboxylic acid metabolic process;cell adhesion;cell communication;cell death;cell migration;cell motility;cell-cell signaling;cellular amine metabolic process;cellular amino…	binding;cell surface binding;cytokine activity;identical protein binding;nucleic acid binding;protein binding;protein dimerization activity;protein homodimerization activity;receptor binding;RNA binding;tRNA binding	aminoacyl-tRNA synthetase multienzyme complex;cell part;cytoplasmic membrane-bounded vesicle;cytoplasmic part;cytoplasmic vesicle;cytosol;endoplasmic reticulum;extracellular region part;extracellular space;Golgi apparatus;intracellular membrane-bounded organelle;intracellular organelle;intracellular part;macromolecular complex;membrane-bounded organelle;membrane-bounded vesicle;nucleus;organelle;…	10	10	10	8	7	8	5	5	8	5	4	9	42	37.039	Q12904-2;Q12904;B4DNK3;D6R937	Q12904-2;Q12904;B4DNK3	Aminoacyl tRNA synthase complex-interacting multifunctional protein 1;Endothelial monocyte-activating polypeptide 2	23.1822	23.317	23.0377	22.1506	22.2507	22.3577	23.072	23.8543	23.2043
AIMP2	3		Apoptosis;Completeproteome;Cytoplasm;Developmentalprotein;Differentiation;Nucleus;Phosphoprotein;Polymorphism;Proteinbiosynthesis;Referenceproteome;Ublconjugation	amine metabolic process;amino acid activation;apoptosis;carboxylic acid metabolic process;cell death;cell differentiation;cellular amine metabolic process;cellular amino acid metabolic process;cellular developmental process;cellular ketone metabolic process;cellular macromolecule metabolic process;cellular metabolic process;cellular nitrogen compound metabolic process;cellular process;death;devel…	binding;protein binding	cell part;cytoplasmic part;cytosol;intracellular membrane-bounded organelle;intracellular organelle;intracellular part;membrane-bounded organelle;nucleus;organelle	5	5	5	2	5	2	2	3	3	3	3	3	31.9	35.348	Q13155;A8MU58;F8W950	Q13155;A8MU58;F8W950	Aminoacyl tRNA synthase complex-interacting multifunctional protein 2	19.4907	21.6553	NaN	19.2501	19.4621	21.6317	19.8686	21.0057	20.2283
AIP	3		Acetylation;Completeproteome;Cushingsyndrome;Cytoplasm;Isomerase;Phosphoprotein;Polymorphism;Referenceproteome;Repeat;Rotamase;TPRrepeat	cellular macromolecule metabolic process;cellular metabolic process;cellular process;cellular protein metabolic process;establishment of localization;establishment of localization in cell;establishment of protein localization;establishment of protein localization in mitochondrion;establishment of protein localization to organelle;intracellular protein transport;intracellular transport;macromolecu…	binding;catalytic activity;cis-trans isomerase activity;GAF domain binding;isomerase activity;molecular transducer activity;peptidyl-prolyl cis-trans isomerase activity;protein binding;protein binding transcription factor activity;protein domain specific binding;signal transducer activity;transcription coactivator activity;transcription cofactor activity;transcription factor binding;transcription…	cell part;cytoplasm;intracellular membrane-bounded organelle;intracellular organelle;intracellular part;membrane-bounded organelle;nucleus;organelle	6	6	6	2	4	4	3	3	3	2	2	3	24.5	37.636	O00170;E9PPD7;E9PMH2	O00170;E9PPD7;E9PMH2	AH receptor-interacting protein;Peptidyl-prolyl cis-trans isomerase	22.7274	22.6953	23.0768	22.4916	22.3358	22.0794	22.7286	22.6931	22.7538
AK2	12	Purine metabolism	3D-structure;Acetylation;Alternativesplicing;ATP-binding;Completeproteome;Directproteinsequencing;Diseasemutation;Disulfidebond;Kinase;Mitochondrion;Nucleotide-binding;Polymorphism;Referenceproteome;Transferase	cellular metabolic process;cellular nitrogen compound metabolic process;cellular process;metabolic process;nitrogen compound metabolic process;nucleobase-containing compound metabolic process;nucleobase-containing small molecule interconversion;nucleobase-containing small molecule metabolic process;primary metabolic process;small molecule metabolic process	adenyl nucleotide binding;adenyl ribonucleotide binding;adenylate kinase activity;ATP binding;binding;catalytic activity;kinase activity;nucleobase-containing compound kinase activity;nucleotide binding;nucleotide kinase activity;phosphotransferase activity, phosphate group as acceptor;purine nucleotide binding;purine ribonucleoside triphosphate binding;purine ribonucleotide binding;ribonucleotid…	cell part;cytoplasmic part;intracellular organelle part;intracellular part;membrane-enclosed lumen;mitochondrial intermembrane space;mitochondrial part;organelle envelope lumen;organelle part	9	9	9	5	8	7	8	8	9	7	7	7	49	26.477	P54819;F8W1A4;P54819-2;F8VY04;P54819-5;E7EWH4;P54819-3;P54819-6;F8VZG5;P54819-4;G3V213;F8VPP1	P54819;F8W1A4;P54819-2;F8VY04;P54819-5;E7EWH4;P54819-3;P54819-6;F8VZG5;P54819-4	Adenylate kinase 2, mitochondrial	25.7519	24.9582	25.948	25.6315	25.3492	25.7461	25.5099	25.3533	25.8009
AK3	3	Pyrimidine metabolism	3D-structure;Acetylation;Completeproteome;GTP-binding;Kinase;Mitochondrion;Nucleotide-binding;Referenceproteome;Transferase	biological regulation;blood coagulation;coagulation;hemostasis;multicellular organismal process;regulation of biological quality;regulation of body fluid levels	adenyl nucleotide binding;adenyl ribonucleotide binding;adenylate kinase activity;ATP binding;binding;catalytic activity;GTP binding;guanyl nucleotide binding;guanyl ribonucleotide binding;kinase activity;nucleobase-containing compound kinase activity;nucleoside triphosphate adenylate kinase activity;nucleotide binding;nucleotide kinase activity;phosphotransferase activity, phosphate group as acc…	cell part;cytoplasmic part;intracellular organelle lumen;intracellular organelle part;intracellular part;membrane-enclosed lumen;mitochondrial matrix;mitochondrial part;organelle lumen;organelle part	7	7	7	4	1	5	5	4	5	5	5	5	35.7	25.565	Q9UIJ7;E7ET30;Q9UIJ7-2	Q9UIJ7;E7ET30;Q9UIJ7-2	GTP:AMP phosphotransferase, mitochondrial	22.303	NaN	21.9476	22.576	21.7637	22.1549	21.9096	20.641	21.6192
AK5;AK1	7	Purine metabolism	3D-structure;Acetylation;Alternativesplicing;ATP-binding;Completeproteome;Cytoplasm;Directproteinsequencing;Diseasemutation;Hereditaryhemolyticanemia;Kinase;Nucleotide-binding;Polymorphism;Referenceproteome;Transferase	2'-deoxyribonucleotide biosynthetic process;2'-deoxyribonucleotide metabolic process;ADP biosynthetic process;ADP metabolic process;ATP metabolic process;biological regulation;biosynthetic process;cellular biosynthetic process;cellular metabolic process;cellular nitrogen compound biosynthetic process;cellular nitrogen compound metabolic process;cellular process;cellular response to stimulus;dADP …	adenyl nucleotide binding;adenyl ribonucleotide binding;adenylate kinase activity;ATP binding;binding;cAMP-dependent protein kinase regulator activity;catalytic activity;enzyme regulator activity;kinase activity;kinase regulator activity;nucleobase-containing compound kinase activity;nucleoside kinase activity;nucleotide binding;nucleotide kinase activity;phosphotransferase activity, phosphate gr…	cell part;centrosome;cytoplasm;cytoplasmic part;cytoskeletal part;cytosol;intracellular non-membrane-bounded organelle;intracellular organelle;intracellular organelle part;intracellular part;microtubule organizing center;non-membrane-bounded organelle;organelle;organelle part	2	2	2	2	1	1	1	0	1	2	0	1	3.4	63.332	Q9Y6K8;Q9Y6K8-3;Q9Y6K8-2;Q5T9B7;P00568;H0Y4J6;H0YID2	Q9Y6K8;Q9Y6K8-3;Q9Y6K8-2;Q5T9B7;P00568;H0Y4J6;H0YID2	Adenylate kinase isoenzyme 5;Adenylate kinase isoenzyme 1	19.9565	NaN	NaN	NaN	NaN	NaN	19.629	NaN	NaN
AKAP2	6		Alternativesplicing;Coiledcoil;Completeproteome;Phosphoprotein;Polymorphism;Referenceproteome		binding;enzyme binding;protein binding		4	4	4	1	2	1	1	2	0	1	1	1	6.5	122.07	Q9Y2D5-4;Q9Y2D5-6;Q9Y2D5-7;Q9Y2D5-5;Q9Y2D5;C9JVY5	Q9Y2D5-4;Q9Y2D5-6;Q9Y2D5-7;Q9Y2D5-5;Q9Y2D5;C9JVY5	A-kinase anchor protein 2	NaN	19.8562	NaN	NaN	NaN	NaN	NaN	NaN	NaN
AKAP8	2		Acetylation;Completeproteome;DNA-binding;Kinase;Metal-binding;Nucleus;Phosphoprotein;Polymorphism;Referenceproteome;Repeat;Zinc;Zinc-finger	biological regulation;cellular process;cellular response to stimulus;regulation of biological process;regulation of cellular process;response to stimulus;signal transduction	binding;catalytic activity;cation binding;DNA binding;ion binding;kinase activity;metal ion binding;nucleic acid binding;transferase activity;transferase activity, transferring phosphorus-containing groups;transition metal ion binding;zinc ion binding	cell part;intracellular membrane-bounded organelle;intracellular organelle;intracellular organelle part;intracellular part;membrane-bounded organelle;nuclear matrix;nuclear part;nucleus;organelle;organelle part	3	3	3	2	1	1	2	2	2	2	2	2	5.8	76.107	O43823;B7Z8L8	O43823	A-kinase anchor protein 8	20.7636	NaN	NaN	20.8806	NaN	20.795	NaN	21.135	20.9371
AKAP8L	1		Acetylation;Completeproteome;Cytoplasm;Metal-binding;Nucleus;Phosphoprotein;Referenceproteome;Repeat;Zinc;Zinc-finger		binding;cation binding;DEAD/H-box RNA helicase binding;DNA binding;enzyme binding;ion binding;metal ion binding;nucleic acid binding;protein binding;transition metal ion binding;zinc ion binding	cell part;cytoplasm;intracellular organelle part;intracellular part;nuclear matrix;nuclear part;organelle part	3	3	3	3	2	3	2	2	1	0	1	1	7.1	71.648	Q9ULX6	Q9ULX6	A-kinase anchor protein 8-like	20.005	18.801	19.457	20.4333	18.8384	NaN	NaN	NaN	NaN
AKR1A1	2	Caprolactam degradation;Glycerolipid metabolism;Glycolysis / Gluconeogenesis	3D-structure;Acetylation;Completeproteome;Directproteinsequencing;NADP;Oxidoreductase;Polymorphism;Referenceproteome	alcohol metabolic process;carbohydrate metabolic process;cellular carbohydrate metabolic process;cellular metabolic process;cellular process;glucose metabolic process;hexose metabolic process;metabolic process;monosaccharide metabolic process;primary metabolic process;small molecule metabolic process	alcohol dehydrogenase (NADP+) activity;alditol:NADP+ 1-oxidoreductase activity;aldo-keto reductase (NADP) activity;catalytic activity;electron carrier activity;oxidoreductase activity;oxidoreductase activity, acting on CH-OH group of donors;oxidoreductase activity, acting on the CH-OH group of donors, NAD or NADP as acceptor		12	12	12	9	9	9	9	7	9	9	7	7	41.2	36.573	P14550;Q5T621	P14550	Alcohol dehydrogenase [NADP(+)]	25.2625	23.7987	23.5844	25.7551	24.322	24.0502	24.9228	24.0925	24.1323
AKR1B1	3	Fructose and mannose metabolism;Galactose metabolism;Glycerolipid metabolism;Pentose and glucuronate interconversions;Pyruvate metabolism	3D-structure;Acetylation;Completeproteome;Cytoplasm;Directproteinsequencing;NADP;Oxidoreductase;Phosphoprotein;Polymorphism;Referenceproteome	antibiotic metabolic process;biological regulation;biosynthetic process;C21-steroid hormone biosynthetic process;C21-steroid hormone metabolic process;carbohydrate metabolic process;cellular biosynthetic process;cellular hormone metabolic process;cellular metabolic process;cellular process;drug metabolic process;hormone biosynthetic process;hormone metabolic process;lipid biosynthetic process;lip…	alcohol dehydrogenase (NADP+) activity;alditol:NADP+ 1-oxidoreductase activity;aldo-keto reductase (NADP) activity;catalytic activity;electron carrier activity;glyceraldehyde oxidoreductase activity;oxidoreductase activity;oxidoreductase activity, acting on CH-OH group of donors;oxidoreductase activity, acting on the aldehyde or oxo group of donors;oxidoreductase activity, acting on the CH-OH gro…	cell part;cytoplasm;cytoplasmic part;cytosol;extracellular region part;extracellular space;intracellular membrane-bounded organelle;intracellular organelle;intracellular part;membrane-bounded organelle;nucleus;organelle	9	9	8	6	7	7	5	4	3	6	4	5	28.2	35.853	P15121;E9PCX2;E9PEF9	P15121;E9PCX2	Aldose reductase	22.6759	23.1774	23.0883	24.0178	23.7513	23.1976	23.6454	23.7481	24.0332
AKR1C2	1		Completeproteome;Referenceproteome				3	1	1	1	2	2	1	1	2	1	2	1	14.5	24.958	B5ME26	B5ME26		NaN	20.1039	NaN	NaN	NaN	NaN	NaN	NaN	NaN
AKR7A2	5		3D-structure;Alternativesplicing;Completeproteome;Cytoplasm;Directproteinsequencing;Golgiapparatus;NADP;Oxidoreductase;Phosphoprotein;Polymorphism;Referenceproteome;Selenocysteine	antibiotic metabolic process;carbohydrate metabolic process;cellular aldehyde metabolic process;cellular metabolic process;cellular process;drug metabolic process;metabolic process;primary metabolic process	alcohol dehydrogenase (NADP+) activity;alditol:NADP+ 1-oxidoreductase activity;aldo-keto reductase (NADP) activity;catalytic activity;electron carrier activity;epoxide hydrolase activity;ether hydrolase activity;hydrolase activity;hydrolase activity, acting on ether bonds;oxidoreductase activity;oxidoreductase activity, acting on CH-OH group of donors;oxidoreductase activity, acting on the CH-OH …	cell part;cytoplasmic part;Golgi apparatus;intracellular membrane-bounded organelle;intracellular organelle;intracellular part;membrane-bounded organelle;organelle	3	3	3	2	3	2	3	2	3	2	2	2	12.8	39.589	O43488;H3BLU7;Q8NHP1;F8W7D9;C9JSL3	O43488;H3BLU7	Aflatoxin B1 aldehyde reductase member 2	22.5729	21.0211	22.6377	23.5051	21.9447	22.3205	23.0998	21.2445	21.7059
AKT2	4	Acute myeloid leukemia;Adipocytokine signaling pathway;Apoptosis;B cell receptor signaling pathway;Carbohydrate digestion and absorption;Chagas disease (American trypanosomiasis);Chemokine signaling pathway;Chronic myeloid leukemia;Colorectal cancer;Endometrial cancer;ErbB signaling pathway;Fc epsilon RI signaling pathway;Fc gamma R-mediated phagocytosis;Focal adhesion;Glioma;Hepatitis C;Insulin …	3D-structure;Apoptosis;ATP-binding;Carbohydratemetabolism;Cellmembrane;Completeproteome;Cytoplasm;Developmentalprotein;Diseasemutation;Disulfidebond;Glucosemetabolism;Glycogenbiosynthesis;Glycogenmetabolism;Kinase;Membrane;Nucleotide-binding;Nucleus;Phosphoprotein;Polymorphism;Proto-oncogene;Referenceproteome;Serine/threonine-proteinkinase;Sugartransport;Transferase;Translationregulation;Transpor…	alcohol metabolic process;biological regulation;biosynthetic process;carbohydrate biosynthetic process;carbohydrate metabolic process;carbohydrate transport;cell differentiation;cell surface receptor linked signaling pathway;cellular biosynthetic process;cellular carbohydrate biosynthetic process;cellular carbohydrate metabolic process;cellular developmental process;cellular glucan metabolic proc…	adenyl nucleotide binding;adenyl ribonucleotide binding;ATP binding;binding;catalytic activity;kinase activity;nucleotide binding;phosphotransferase activity, alcohol group as acceptor;protein kinase activity;protein serine/threonine kinase activity;purine nucleotide binding;purine ribonucleoside triphosphate binding;purine ribonucleotide binding;ribonucleotide binding;transferase activity;transf…	cell part;cytoplasmic part;cytosol;intracellular part;membrane;plasma membrane	2	2	2	0	2	2	0	1	2	1	2	1	4.2	55.768	P31751;Q0VAN0;B3KP61;C9K000	P31751;Q0VAN0;B3KP61;C9K000	RAC-beta serine/threonine-protein kinase	NaN	21.4313	20.7922	NaN	NaN	21.536	NaN	NaN	NaN
ALAD	3	Porphyrin and chlorophyll metabolism	3D-structure;Allostericenzyme;Alternativesplicing;Completeproteome;Directproteinsequencing;Diseasemutation;Hemebiosynthesis;Lyase;Metal-binding;Polymorphism;Porphyrinbiosynthesis;Referenceproteome;Zinc	biosynthetic process;cellular biosynthetic process;cellular component assembly;cellular component organization;cellular component organization or biogenesis;cellular metabolic process;cellular nitrogen compound biosynthetic process;cellular nitrogen compound metabolic process;cellular process;cofactor biosynthetic process;cofactor metabolic process;heme biosynthetic process;heme metabolic process…	binding;carbon-oxygen lyase activity;catalytic activity;cation binding;hydro-lyase activity;identical protein binding;ion binding;lead ion binding;lyase activity;metal ion binding;porphobilinogen synthase activity;protein binding;transition metal ion binding;zinc ion binding	cell part;cytoplasmic part;cytosol;intracellular part	4	4	4	1	1	1	3	0	3	3	2	3	16.4	39.033	P13716-2;P13716;B7ZBK6	P13716-2;P13716	Delta-aminolevulinic acid dehydratase	NaN	NaN	NaN	22.0552	NaN	20.8477	22.4412	20.471	21.6072
ALDH16A1	4		Acetylation;Alternativesplicing;Completeproteome;Polymorphism;Referenceproteome		catalytic activity;oxidoreductase activity;oxidoreductase activity, acting on the aldehyde or oxo group of donors;oxidoreductase activity, acting on the aldehyde or oxo group of donors, NAD or NADP as acceptor		7	7	7	2	4	4	1	1	2	1	3	2	13.5	85.126	Q8IZ83;Q8IZ83-3;F5H4B6;F8WBH3	Q8IZ83;Q8IZ83-3;F5H4B6;F8WBH3	Aldehyde dehydrogenase family 16 member A1	22.1551	20.5741	22.1654	NaN	NaN	21.042	NaN	21.7382	21.6333
ALDH18A1	2	Arginine and proline metabolism	3D-structure;Alternativesplicing;Amino-acidbiosynthesis;ATP-binding;Completeproteome;Diseasemutation;Kinase;Membrane;Mentalretardation;Mitochondrion;Mitochondrioninnermembrane;Multifunctionalenzyme;NADP;Nucleotide-binding;Oxidoreductase;Polymorphism;Prolinebiosynthesis;Referenceproteome;Transferase	amine biosynthetic process;amine metabolic process;biosynthetic process;carboxylic acid biosynthetic process;carboxylic acid metabolic process;cellular amine metabolic process;cellular amino acid biosynthetic process;cellular amino acid metabolic process;cellular biosynthetic process;cellular ketone metabolic process;cellular metabolic process;cellular nitrogen compound biosynthetic process;cellu…	adenyl nucleotide binding;adenyl ribonucleotide binding;amino acid kinase activity;ATP binding;binding;catalytic activity;glutamate 5-kinase activity;glutamate-5-semialdehyde dehydrogenase activity;kinase activity;nucleotide binding;oxidoreductase activity;oxidoreductase activity, acting on the aldehyde or oxo group of donors;oxidoreductase activity, acting on the aldehyde or oxo group of donors,…	cell part;cytoplasmic part;intracellular organelle part;intracellular part;membrane;mitochondrial inner membrane;mitochondrial membrane;mitochondrial part;organelle inner membrane;organelle membrane;organelle part	19	19	19	8	18	14	4	14	11	6	15	11	31.4	87.301	P54886;P54886-2	P54886;P54886-2	Delta-1-pyrroline-5-carboxylate synthase;Glutamate 5-kinase;Gamma-glutamyl phosphate reductase	22.0952	24.5998	23.787	21.989	24	23.5132	22.5835	24.381	23.0479
ALDH1A1	15	beta-Alanine metabolism;Drug metabolism - cytochrome P450;Glycolysis / Gluconeogenesis;Histidine metabolism;Metabolism of xenobiotics by cytochrome P450;Phenylalanine metabolism;Retinol metabolism;Tyrosine metabolism	Acetylation;Alternativesplicing;Completeproteome;Cytoplasm;Directproteinsequencing;NAD;Oxidoreductase;Phosphoprotein;Polymorphism;Referenceproteome	alcohol metabolic process;anatomical structure development;apocarotenoid metabolic process;biological regulation;cellular aldehyde metabolic process;cellular lipid metabolic process;cellular metabolic process;cellular process;developmental process;diterpenoid metabolic process;ethanol metabolic process;ethanol oxidation;fat-soluble vitamin metabolic process;isoprenoid metabolic process;lipid meta…	3-chloroallyl aldehyde dehydrogenase activity;aldehyde dehydrogenase (NAD) activity;aldehyde dehydrogenase [NAD(P)+] activity;androgen binding;binding;catalytic activity;enzyme activator activity;enzyme regulator activity;GTPase activator activity;GTPase regulator activity;hormone binding;identical protein binding;isoprenoid binding;lipid binding;nucleoside-triphosphatase regulator activity;oxido…	cell part;cytoplasm;cytoplasmic part;cytosol;intracellular membrane-bounded organelle;intracellular organelle;intracellular part;membrane-bounded organelle;nucleus;organelle	18	18	16	8	12	8	14	11	8	11	8	8	42.9	54.861	P00352;E7ER57;H0Y4S2;Q5SYQ8;Q5SYQ9;Q5SYQ7;O94788;P47895;F5H2Y9;F5H3R1;H0YMG7;O94788-2;E7ENA1;H0YM00;H0Y2X5	P00352;E7ER57	Retinal dehydrogenase 1	24.9638	22.806	22.0807	25.8304	24.1744	22.5911	24.8308	23.3131	22.3142
ALDH1B1	1	Arginine and proline metabolism;Ascorbate and aldarate metabolism;beta-Alanine metabolism;Chloroalkane and chloroalkene degradation;Fatty acid metabolism;Glycerolipid metabolism;Glycolysis / Gluconeogenesis;Histidine metabolism;Limonene and pinene degradation;Lysine degradation;Pentose and glucuronate interconversions;Propanoate metabolism;Pyruvate metabolism;Tryptophan metabolism;Valine, leucine…	Completeproteome;Mitochondrion;NAD;Oxidoreductase;Polymorphism;Referenceproteome;Transitpeptide	carbohydrate metabolic process;metabolic process;primary metabolic process	aldehyde dehydrogenase (NAD) activity;catalytic activity;oxidoreductase activity;oxidoreductase activity, acting on the aldehyde or oxo group of donors;oxidoreductase activity, acting on the aldehyde or oxo group of donors, NAD or NADP as acceptor	cell part;cytoplasmic part;intracellular membrane-bounded organelle;intracellular organelle;intracellular organelle lumen;intracellular organelle part;intracellular part;membrane-bounded organelle;membrane-enclosed lumen;mitochondrial matrix;mitochondrial part;nucleus;organelle;organelle lumen;organelle part	8	7	3	4	6	5	3	3	4	5	4	4	20.9	57.206	P30837	P30837	Aldehyde dehydrogenase X, mitochondrial	22.1413	21.6436	20.7121	21.8623	20.8252	21.0989	21.9535	21.3204	21.2431
ALDH2	4	Arginine and proline metabolism;Ascorbate and aldarate metabolism;beta-Alanine metabolism;Chloroalkane and chloroalkene degradation;Fatty acid metabolism;Glycerolipid metabolism;Glycolysis / Gluconeogenesis;Histidine metabolism;Limonene and pinene degradation;Lysine degradation;Pentose and glucuronate interconversions;Propanoate metabolism;Pyruvate metabolism;Tryptophan metabolism;Valine, leucine…	3D-structure;Acetylation;Completeproteome;Directproteinsequencing;Mitochondrion;NAD;Oxidoreductase;Polymorphism;Referenceproteome;Transitpeptide	alcohol metabolic process;biological regulation;biosynthetic process;carbohydrate metabolic process;cellular biosynthetic process;cellular metabolic process;cellular process;ethanol metabolic process;ethanol oxidation;metabolic process;neurotransmitter biosynthetic process;neurotransmitter metabolic process;oxidation-reduction process;primary alcohol metabolic process;primary metabolic process;re…	aldehyde dehydrogenase (NAD) activity;aldehyde dehydrogenase [NAD(P)+] activity;catalytic activity;electron carrier activity;oxidoreductase activity;oxidoreductase activity, acting on the aldehyde or oxo group of donors;oxidoreductase activity, acting on the aldehyde or oxo group of donors, NAD or NADP as acceptor	cell part;cytoplasmic part;intracellular organelle lumen;intracellular organelle part;intracellular part;membrane-enclosed lumen;mitochondrial matrix;mitochondrial part;organelle lumen;organelle part	18	16	13	7	14	16	11	9	11	6	4	8	41.8	56.381	P05091;E7EUE5;F8W0A9;F8VXI5	P05091;E7EUE5;F8W0A9;F8VXI5	Aldehyde dehydrogenase, mitochondrial	23.3098	22.3497	23.848	24.8935	22.0278	24.6977	23.9523	21.4906	23.4969
ALDH4A1	5	Alanine, aspartate and glutamate metabolism;Arginine and proline metabolism	Acetylation;Completeproteome;Directproteinsequencing;Diseasemutation;Mitochondrion;NAD;Oxidoreductase;Phosphoprotein;Polymorphism;Prolinemetabolism;Referenceproteome;Transitpeptide	amine biosynthetic process;amine catabolic process;amine metabolic process;biosynthetic process;carboxylic acid biosynthetic process;carboxylic acid catabolic process;carboxylic acid metabolic process;catabolic process;cellular amine metabolic process;cellular amino acid biosynthetic process;cellular amino acid catabolic process;cellular amino acid metabolic process;cellular biosynthetic process;…	1-pyrroline-5-carboxylate dehydrogenase activity;aldehyde dehydrogenase (NAD) activity;catalytic activity;electron carrier activity;oxidoreductase activity;oxidoreductase activity, acting on the aldehyde or oxo group of donors;oxidoreductase activity, acting on the aldehyde or oxo group of donors, NAD or NADP as acceptor;oxidoreductase activity, acting on the CH-NH group of donors;oxidoreductase …	cell part;cytoplasmic part;intracellular organelle lumen;intracellular organelle part;intracellular part;membrane-enclosed lumen;mitochondrial matrix;mitochondrial part;organelle lumen;organelle part	8	8	8	3	4	5	3	3	5	2	3	3	22.9	61.719	P30038;D2D4A3;P30038-2;Q5TF55;C9JTC4	P30038;D2D4A3;P30038-2	Delta-1-pyrroline-5-carboxylate dehydrogenase, mitochondrial	22.6474	21.149	22.0264	21.9537	20.9844	22.1626	22.1028	21.1408	21.8092
ALDH5A1	4	Alanine, aspartate and glutamate metabolism;Butanoate metabolism	3D-structure;Acetylation;Completeproteome;Diseasemutation;Disulfidebond;Mitochondrion;NAD;Oxidoreductase;Polymorphism;Referenceproteome;Transitpeptide	acetate metabolic process;alcohol metabolic process;amine catabolic process;amine metabolic process;anatomical structure development;biological regulation;carbohydrate metabolic process;carboxylic acid catabolic process;carboxylic acid metabolic process;catabolic process;cellular amine metabolic process;cellular amino acid catabolic process;cellular amino acid metabolic process;cellular carbohydr…	binding;catalytic activity;identical protein binding;oxidoreductase activity;oxidoreductase activity, acting on the aldehyde or oxo group of donors;oxidoreductase activity, acting on the aldehyde or oxo group of donors, NAD or NADP as acceptor;protein binding;protein dimerization activity;protein homodimerization activity;succinate-semialdehyde dehydrogenase activity	cell fraction;cell part;cytoplasmic part;intracellular membrane-bounded organelle;intracellular organelle;intracellular organelle lumen;intracellular organelle part;intracellular part;membrane-bounded organelle;membrane-enclosed lumen;mitochondrial matrix;mitochondrial part;mitochondrion;organelle;organelle lumen;organelle part;soluble fraction	5	5	5	1	1	0	2	1	1	2	2	1	13.3	58.653	G5E949;P51649;C9J8Q5;F5H328	G5E949;P51649;C9J8Q5;F5H328	Succinate-semialdehyde dehydrogenase, mitochondrial	NaN	NaN	NaN	NaN	NaN	NaN	20.7897	NaN	NaN
ALDH6A1	2	Inositol phosphate metabolism;Propanoate metabolism;Valine, leucine and isoleucine degradation	Acetylation;Completeproteome;Diseasemutation;Mitochondrion;NAD;Oxidoreductase;Referenceproteome;Transitpeptide	amine catabolic process;amine metabolic process;branched chain family amino acid catabolic process;branched chain family amino acid metabolic process;carboxylic acid catabolic process;carboxylic acid metabolic process;catabolic process;cellular amine metabolic process;cellular amino acid catabolic process;cellular amino acid metabolic process;cellular aromatic compound metabolic process;cellular …	binding;carboxylic acid binding;catalytic activity;coenzyme binding;cofactor binding;fatty acid binding;fatty-acyl-CoA binding;lipid binding;malonate-semialdehyde dehydrogenase (acetylating) activity;methylmalonate-semialdehyde dehydrogenase (acylating) activity;monocarboxylic acid binding;oxidoreductase activity;oxidoreductase activity, acting on the aldehyde or oxo group of donors;oxidoreductas…	cell part;cytoplasmic part;intracellular membrane-bounded organelle;intracellular organelle;intracellular organelle lumen;intracellular organelle part;intracellular part;membrane-bounded organelle;membrane-enclosed lumen;mitochondrial matrix;mitochondrial part;nucleus;organelle;organelle lumen;organelle part	5	5	5	3	3	4	5	3	4	5	4	4	12.9	57.839	Q02252;G3V4Z4	Q02252;G3V4Z4	Methylmalonate-semialdehyde dehydrogenase [acylating], mitochondrial	23.8568	21.5391	21.974	23.6285	20.4571	21.5684	23.3668	21.0152	21.6174
ALDH7A1	7	Arginine and proline metabolism;Ascorbate and aldarate metabolism;beta-Alanine metabolism;Fatty acid metabolism;Glycerolipid metabolism;Glycine, serine and threonine metabolism;Glycolysis / Gluconeogenesis;Histidine metabolism;Lysine biosynthesis;Lysine degradation;Propanoate metabolism;Pyruvate metabolism;Tryptophan metabolism;Valine, leucine and isoleucine degradation	3D-structure;Alternativesplicing;Completeproteome;Cytoplasm;Diseasemutation;Epilepsy;Mitochondrion;NAD;Nucleus;Oxidoreductase;Polymorphism;Referenceproteome;Transitpeptide	amine catabolic process;amine metabolic process;aspartate family amino acid catabolic process;aspartate family amino acid metabolic process;carboxylic acid catabolic process;carboxylic acid metabolic process;catabolic process;cellular aldehyde metabolic process;cellular amine metabolic process;cellular amino acid catabolic process;cellular amino acid metabolic process;cellular catabolic process;c…	betaine-aldehyde dehydrogenase activity;binding;catalytic activity;L-aminoadipate-semialdehyde dehydrogenase activity;oxidoreductase activity;oxidoreductase activity, acting on the aldehyde or oxo group of donors;oxidoreductase activity, acting on the aldehyde or oxo group of donors, NAD or NADP as acceptor;protein binding	cell part;cytoplasmic part;cytosol;intracellular membrane-bounded organelle;intracellular organelle;intracellular organelle lumen;intracellular organelle part;intracellular part;membrane-bounded organelle;membrane-enclosed lumen;mitochondrial matrix;mitochondrial part;nucleus;organelle;organelle lumen;organelle part	5	5	5	4	2	4	2	5	4	3	3	4	11.3	58.486	P49419;P49419-2;E7EPT3;F8VS02;P49419-3;H0YHM6;F8VVF2	P49419;P49419-2;E7EPT3;F8VS02;P49419-3	Alpha-aminoadipic semialdehyde dehydrogenase	21.6098	21.1962	20.9461	21.7306	20.7531	21.1266	22.0372	21.1655	21.2854
ALDH9A1	2	Arginine and proline metabolism;Ascorbate and aldarate metabolism;beta-Alanine metabolism;Fatty acid metabolism;Glycerolipid metabolism;Glycolysis / Gluconeogenesis;Histidine metabolism;Lysine degradation;Propanoate metabolism;Pyruvate metabolism;Tryptophan metabolism;Valine, leucine and isoleucine degradation	Acetylation;Completeproteome;Cytoplasm;Directproteinsequencing;NAD;Oxidoreductase;Polymorphism;Referenceproteome	amine biosynthetic process;amine metabolic process;betaine biosynthetic process;betaine metabolic process;biological regulation;biosynthetic process;carboxylic acid biosynthetic process;carboxylic acid metabolic process;carnitine biosynthetic process;carnitine metabolic process;cellular aldehyde metabolic process;cellular amine metabolic process;cellular amino acid biosynthetic process;cellular a…	1-pyrroline dehydrogenase activity;3-chloroallyl aldehyde dehydrogenase activity;4-trimethylammoniobutyraldehyde dehydrogenase activity;aminobutyraldehyde dehydrogenase activity;catalytic activity;oxidoreductase activity;oxidoreductase activity, acting on the aldehyde or oxo group of donors;oxidoreductase activity, acting on the aldehyde or oxo group of donors, NAD or NADP as acceptor	cell part;cytoplasmic part;cytosol;intracellular part;membrane;plasma membrane	7	7	7	4	4	3	5	4	5	3	2	3	17.2	53.801	P49189;B4DXY7	P49189;B4DXY7	4-trimethylaminobutyraldehyde dehydrogenase	23.1864	22.041	22.5566	23.4696	22.768	22.647	23.3647	22.3701	22.9624
ALDOA	15	Carbon fixation in photosynthetic organisms;Fructose and mannose metabolism;Glycolysis / Gluconeogenesis;Pentose phosphate pathway	3D-structure;Acetylation;Completeproteome;Directproteinsequencing;Diseasemutation;Glycogenstoragedisease;Glycolysis;Hereditaryhemolyticanemia;Lyase;Phosphoprotein;Polymorphism;Referenceproteome;Schiffbase	actin cytoskeleton organization;actin filament organization;actin filament-based process;alcohol biosynthetic process;alcohol catabolic process;alcohol metabolic process;anatomical structure homeostasis;ATP biosynthetic process;ATP metabolic process;biological regulation;biosynthetic process;carbohydrate biosynthetic process;carbohydrate catabolic process;carbohydrate metabolic process;catabolic …	actin binding;aldehyde-lyase activity;ATPase binding;binding;carbohydrate binding;carbon-carbon lyase activity;catalytic activity;cytoskeletal protein binding;enzyme binding;fructose binding;fructose-bisphosphate aldolase activity;identical protein binding;lyase activity;monosaccharide binding;protein binding;sugar binding;tubulin binding	actin cytoskeleton;cell part;centriolar satellite;contractile fiber part;cytoplasmic membrane-bounded vesicle lumen;cytoplasmic part;cytoplasmic vesicle part;cytoskeletal part;cytoskeleton;cytosol;extracellular membrane-bounded organelle;extracellular organelle;extracellular region part;extracellular vesicular exosome;I band;intracellular membrane-bounded organelle;intracellular non-membrane-boun…	19	19	18	10	16	16	9	9	8	10	11	13	59.1	39.42	P04075;H3BQN4;H3BPS8;H3BUH7;H3BR04;H3BNM5;H3BMQ8;H3BT43;H3BPH5;H3BR68;H3BRS7;H3BU78;P05062;C9J4K3;Q5T7D5	P04075;H3BQN4;H3BPS8;H3BUH7;H3BR04;H3BNM5;H3BMQ8	Fructose-bisphosphate aldolase A;Fructose-bisphosphate aldolase	26.579	26.9429	27.9191	27.4843	27.8424	28.1659	27.5192	27.6505	27.7296
ALDOC	5	Carbon fixation in photosynthetic organisms;Fructose and mannose metabolism;Glycolysis / Gluconeogenesis;Pentose phosphate pathway	3D-structure;Acetylation;Completeproteome;Glycolysis;Lyase;Phosphoprotein;Referenceproteome;Schiffbase	alcohol biosynthetic process;alcohol catabolic process;alcohol metabolic process;biosynthetic process;carbohydrate biosynthetic process;carbohydrate catabolic process;carbohydrate metabolic process;catabolic process;cellular biosynthetic process;cellular carbohydrate biosynthetic process;cellular carbohydrate catabolic process;cellular carbohydrate metabolic process;cellular metabolic process;cel…	aldehyde-lyase activity;binding;carbon-carbon lyase activity;catalytic activity;cytoskeletal protein binding;fructose-bisphosphate aldolase activity;lyase activity;protein binding	cell part;cytoplasmic part;cytoskeleton;cytosol;intracellular non-membrane-bounded organelle;intracellular organelle;intracellular part;non-membrane-bounded organelle;organelle	12	11	11	4	7	9	6	5	6	5	6	6	36.5	39.455	P09972;A8MVZ9;B7Z1N6;B7Z3K7;C9J8F3	P09972;A8MVZ9;B7Z1N6;B7Z3K7;C9J8F3	Fructose-bisphosphate aldolase C;Fructose-bisphosphate aldolase	25.805	25.15	26.1825	26.1043	24.7383	25.6604	26.1916	25.18	26.3443
ALOX12	1	Arachidonic acid metabolism	3D-structure;Completeproteome;Cytoplasm;Dioxygenase;Iron;Leukotrienebiosynthesis;Metal-binding;Oxidoreductase;Polymorphism;Referenceproteome	alkene biosynthetic process;anti-apoptosis;biological regulation;biosynthetic process;carboxylic acid biosynthetic process;carboxylic acid metabolic process;cellular alkene metabolic process;cellular biosynthetic process;cellular component movement;cellular ketone metabolic process;cellular lipid metabolic process;cellular metabolic process;cellular process;fatty acid biosynthetic process;fatty a…	arachidonate 12-lipoxygenase activity;binding;catalytic activity;cation binding;dioxygenase activity;ether hydrolase activity;hepoxilin-epoxide hydrolase activity;hydrolase activity;hydrolase activity, acting on ether bonds;ion binding;iron ion binding;lipoxygenase activity;metal ion binding;oxidoreductase activity;oxidoreductase activity, acting on single donors with incorporation of molecular o…	cell part;cytoplasmic part;cytosol;intracellular part;membrane;plasma membrane;sarcolemma	4	4	4	3	0	0	1	0	0	3	0	0	8.9	75.693	P18054	P18054	Arachidonate 12-lipoxygenase, 12S-type	20.6446	NaN	NaN	NaN	NaN	NaN	22.1361	NaN	NaN
ALYREF	2	mRNA surveillance pathway;RNA transport;Spliceosome	3D-structure;Acetylation;Chaperone;Completeproteome;Cytoplasm;Directproteinsequencing;Host-virusinteraction;Methylation;mRNAprocessing;mRNAsplicing;mRNAtransport;Nucleus;Phosphoprotein;Referenceproteome;RNA-binding;Spliceosome;Transport	biosynthetic process;cellular biosynthetic process;cellular macromolecule metabolic process;cellular metabolic process;cellular nitrogen compound metabolic process;cellular process;establishment of localization;establishment of localization in cell;establishment of RNA localization;interaction with host;interspecies interaction between organisms;intracellular transport;intronless viral mRNA expor…	binding;nucleic acid binding;nucleotide binding;protein binding;RNA binding	catalytic step 2 spliceosome;cell part;cytoplasmic part;cytosol;intracellular membrane-bounded organelle;intracellular organelle;intracellular organelle part;intracellular part;macromolecular complex;membrane-bounded organelle;nuclear body;nuclear part;nuclear speck;nucleoplasm part;nucleus;organelle;organelle part;protein complex;ribonucleoprotein complex;spliceosomal complex;transcription expor…	5	5	5	3	4	3	3	3	3	1	3	2	35.6	27.557	E9PB61;Q86V81	E9PB61;Q86V81	THO complex subunit 4	22.3001	22.4069	22.1623	21.6964	22.3416	22.8238	NaN	23.3481	21.8053
AMBP	2		3D-structure;Chromophore;Cleavageonpairofbasicresidues;Completeproteome;Directproteinsequencing;Disulfidebond;Glycoprotein;Host-virusinteraction;Proteaseinhibitor;Referenceproteome;Repeat;Secreted;Serineproteaseinhibitor;Signal	biological adhesion;biological regulation;catabolic process;cell adhesion;cellular catabolic process;cellular macromolecule metabolic process;cellular metabolic process;cellular nitrogen compound catabolic process;cellular nitrogen compound metabolic process;cellular process;cellular protein metabolic process;cofactor catabolic process;cofactor metabolic process;female pregnancy;heme catabolic pr…	binding;calcium channel inhibitor activity;calcium channel regulator activity;calcium oxalate binding;cation binding;channel inhibitor activity;channel regulator activity;endopeptidase inhibitor activity;endopeptidase regulator activity;enzyme inhibitor activity;enzyme regulator activity;heme binding;identical protein binding;IgA binding;immunoglobulin binding;ion binding;ion channel inhibitor ac…	cell part;extracellular region;membrane;plasma membrane	3	3	3	2	0	0	2	1	0	2	0	1	14.2	38.999	P02760;B7Z8R6	P02760;B7Z8R6	Protein AMBP;Alpha-1-microglobulin;Inter-alpha-trypsin inhibitor light chain;Trypstatin	21.8887	NaN	NaN	23.3712	NaN	NaN	22.8809	NaN	NaN
AMICA1	7		Alternativesplicing;Celladhesion;Celljunction;Cellmembrane;Completeproteome;Directproteinsequencing;Disulfidebond;Glycoprotein;Immunoglobulindomain;Membrane;Polymorphism;Referenceproteome;Repeat;Signal;Transmembrane;Transmembranehelix	biological adhesion;biological regulation;blood coagulation;cell adhesion;cell chemotaxis;cell migration;cell motility;cell-cell adhesion;cellular component movement;cellular process;cellular response to chemical stimulus;cellular response to stimulus;chemotaxis;coagulation;establishment of localization;hemostasis;heterophilic cell-cell adhesion;immune system process;leukocyte chemotaxis;leukocyt…	binding;cell adhesion molecule binding;protein binding	cell junction;cell part;cell-cell junction;integral to membrane;intrinsic to membrane;membrane part;occluding junction;tight junction	2	2	2	0	1	2	0	0	1	0	1	1	5.1	44.339	Q86YT9;Q86YT9-2;E9PR26;Q496M1;E9PKK2;Q86YT9-3;F5H3T6	Q86YT9;Q86YT9-2;E9PR26;Q496M1;E9PKK2;Q86YT9-3;F5H3T6	Junctional adhesion molecule-like	NaN	NaN	19.1102	NaN	NaN	NaN	NaN	NaN	NaN
AMPD2	10	Purine metabolism	Acetylation;Alternativesplicing;Completeproteome;Hydrolase;Metal-binding;Nucleotidemetabolism;Phosphoprotein;Referenceproteome;Zinc	biosynthetic process;cellular aromatic compound metabolic process;cellular biosynthetic process;cellular metabolic compound salvage;cellular metabolic process;cellular nitrogen compound biosynthetic process;cellular nitrogen compound metabolic process;cellular process;heterocycle biosynthetic process;heterocycle metabolic process;IMP biosynthetic process;IMP metabolic process;metabolic process;ni…	AMP deaminase activity;binding;catalytic activity;cation binding;deaminase activity;hydrolase activity;hydrolase activity, acting on carbon-nitrogen (but not peptide) bonds;hydrolase activity, acting on carbon-nitrogen (but not peptide) bonds, in cyclic amidines;ion binding;metal ion binding	cell part;cytoplasmic part;cytosol;intracellular part	6	6	6	3	4	4	3	3	3	3	3	3	9.2	100.69	Q01433;H0Y360;Q01433-4;Q01433-2;E9PNG0;Q01433-3;H0YCL9;E9PIJ1;E9PJF6;H0YF16	Q01433;H0Y360;Q01433-4;Q01433-2;E9PNG0;Q01433-3;H0YCL9;E9PIJ1	AMP deaminase 2	22.0676	21.0143	21.2247	21.9271	21.2899	20.9892	21.9407	21.2463	21.2739
ANAPC1	3	Cell cycle;Cell cycle - yeast;Meiosis - yeast;Oocyte meiosis;Progesterone-mediated oocyte maturation;Ubiquitin mediated proteolysis	Cellcycle;Celldivision;Completeproteome;Mitosis;Phosphoprotein;Referenceproteome;Repeat;Ublconjugationpathway	anaphase-promoting complex-dependent proteasomal ubiquitin-dependent protein catabolic process;biological regulation;catabolic process;cell cycle checkpoint;cell cycle phase;cell cycle process;cell division;cellular catabolic process;cellular component organization;cellular component organization at cellular level;cellular component organization or biogenesis;cellular component organization or bi…		anaphase-promoting complex;cell part;cullin-RING ubiquitin ligase complex;cytoplasmic part;cytosol;intracellular organelle part;intracellular part;macromolecular complex;nuclear part;nuclear ubiquitin ligase complex;nucleoplasm;organelle part;protein complex;ubiquitin ligase complex	4	4	4	1	2	1	1	3	2	1	2	2	3.1	216.5	Q9H1A4;H0Y564;F8WAS1	Q9H1A4;H0Y564	Anaphase-promoting complex subunit 1	NaN	NaN	NaN	NaN	20.1623	18.9952	NaN	18.3794	18.9621
ANK1	21		3D-structure;Alternativepromoterusage;Alternativesplicing;ANKrepeat;Completeproteome;Cytoplasm;Cytoskeleton;Directproteinsequencing;Diseasemutation;Elliptocytosis;Hereditaryhemolyticanemia;Lipoprotein;Membrane;Phosphoprotein;Polymorphism;Referenceproteome;Repeat;Sarcoplasmicreticulum	axon guidance;biological regulation;cellular component organization;cellular component organization at cellular level;cellular component organization or biogenesis;cellular component organization or biogenesis at cellular level;cellular process;cellular response to stimulus;chemotaxis;cytoskeleton organization;establishment of localization;establishment of localization in cell;establishment or ma…	binding;binding, bridging;cytoskeletal adaptor activity;cytoskeletal protein binding;enzyme binding;protein binding;protein binding, bridging;spectrin binding;structural constituent of cytoskeleton;structural molecule activity	basolateral plasma membrane;cell part;contractile fiber part;cytoplasmic part;cytoskeleton;cytosol;endoplasmic reticulum;intracellular membrane-bounded organelle;intracellular non-membrane-bounded organelle;intracellular organelle;intracellular part;M band;membrane part;membrane-bounded organelle;non-membrane-bounded organelle;organelle;organelle part;plasma membrane part;sarcoplasmic reticulum;s…	2	2	2	1	1	0	0	0	0	2	1	0	1.2	217.48	P16157-14;E7EVE3;P16157-12;P16157-21;P16157;P16157-3;P16157-16;P16157-5;P16157-8;P16157-15;P16157-10;P16157-13;P16157-4;P16157-7;P16157-6;P16157-9;P16157-11;E7EVX7;P16157-2;H0YBS0;H0YAY8	P16157-14;E7EVE3;P16157-12;P16157-21;P16157;P16157-3;P16157-16;P16157-5;P16157-8;P16157-15;P16157-10;P16157-13;P16157-4;P16157-7;P16157-6;P16157-9;P16157-11;E7EVX7;P16157-2;H0YBS0;H0YAY8	Ankyrin-1	NaN	NaN	NaN	NaN	NaN	NaN	19.758	NaN	NaN
ANKHD1;FLJ00246	15		Alternativesplicing;ANKrepeat;Coiledcoil;Completeproteome;Cytoplasm;Phosphoprotein;Polymorphism;Referenceproteome;Repeat;RNA-binding		binding;nucleic acid binding;protein binding;RNA binding	cell part;cytoplasm;intracellular membrane-bounded organelle;intracellular organelle;intracellular part;membrane-bounded organelle;nucleus;organelle	12	12	5	5	8	4	2	7	4	3	7	4	6.5	277.17	Q8IWZ2;Q8IWZ3-4;Q8IWZ3;E9PF56;E9PDP5;Q8TEF1;E7ETA2;H3BLS9;E7ET58;H7BXD7;H7C2F5;Q8IWZ3-2;Q8IWZ3-3;Q8IWZ3-5;D6RHC4	Q8IWZ2;Q8IWZ3-4;Q8IWZ3;E9PF56;E9PDP5;Q8TEF1;E7ETA2;H3BLS9;E7ET58;H7BXD7;H7C2F5	Ankyrin repeat and KH domain-containing protein 1	20.7552	21.3152	20.7658	NaN	21.7892	20.7152	21.2413	21.5343	21.2559
ANKMY2	2		ANKrepeat;Cellprojection;Cilium;Completeproteome;Metal-binding;Referenceproteome;Repeat;Zinc;Zinc-finger		binding;cation binding;ion binding;metal ion binding;transition metal ion binding;zinc ion binding	cell part;cell projection;cilium	2	2	2	1	1	1	0	1	1	1	2	1	5.4	49.298	Q8IV38;G3V0G5	Q8IV38;G3V0G5	Ankyrin repeat and MYND domain-containing protein 2	NaN	NaN	NaN	NaN	NaN	NaN	NaN	20.9227	NaN
ANKRD13A	5		ANKrepeat;Completeproteome;Phosphoprotein;Polymorphism;Referenceproteome;Repeat				3	3	3	1	2	3	1	1	1	1	1	1	6.8	67.618	Q8IZ07;E9PGV0;H0YIN8;B3KMT9;B3KT78	Q8IZ07;E9PGV0	Ankyrin repeat domain-containing protein 13A	NaN	18.8288	20.4087	NaN	NaN	NaN	NaN	NaN	NaN
ANKRD17	13		Alternativesplicing;ANKrepeat;Coiledcoil;Completeproteome;Cytoplasm;Host-virusinteraction;Nucleus;Phosphoprotein;Polymorphism;Referenceproteome;Repeat;RNA-binding	interspecies interaction between organisms;multi-organism process	binding;nucleic acid binding;RNA binding	cell part;cytoplasm;intracellular membrane-bounded organelle;intracellular organelle;intracellular part;membrane-bounded organelle;nucleus;organelle	12	5	5	2	8	2	0	5	3	1	6	3	7.4	274.25	O75179;O75179-2;E7EUV3;H0YM23;G5E964;E7EWI7;O75179-4;O75179-3;C9JRC1;B5MEE3;H0YLQ3;H0YMS3;O75179-5	O75179;O75179-2;E7EUV3;H0YM23;G5E964;E7EWI7;O75179-4;O75179-3;C9JRC1;B5MEE3	Ankyrin repeat domain-containing protein 17	NaN	20.5059	NaN	NaN	NaN	NaN	NaN	NaN	NaN
ANKRD44	12		Alternativesplicing;ANKrepeat;Completeproteome;Referenceproteome;Repeat		binding;protein binding		7	7	7	2	2	3	3	2	3	2	3	5	9.3	107.77	Q8N8A2-2;Q8N8A2;H7C209;H7BXV4;Q8N8A2-4;Q8N8A2-3;H7C3P1;F5H682;Q8N8A2-5;H7C4A0;C9JY51;F8WBW3	Q8N8A2-2;Q8N8A2;H7C209;H7BXV4;Q8N8A2-4	Serine/threonine-protein phosphatase 6 regulatory ankyrin repeat subunit B	19.9177	19.1558	20.9981	NaN	18.7403	21.0755	20.0441	18.5834	21.694
ANP32A	5		3D-structure;Acetylation;Completeproteome;Cytoplasm;Directproteinsequencing;Endoplasmicreticulum;Leucine-richrepeat;Nucleus;Phosphoprotein;Polymorphism;Referenceproteome;Repeat;Repressor;Transcription;Transcriptionregulation	biological regulation;biosynthetic process;cellular biosynthetic process;cellular macromolecule biosynthetic process;cellular macromolecule metabolic process;cellular metabolic process;cellular nitrogen compound metabolic process;cellular process;cellular response to stimulus;establishment of localization;establishment of localization in cell;intracellular signal transduction;intracellular transp…	binding;protein binding	cell part;cytoplasmic part;endoplasmic reticulum;intracellular membrane-bounded organelle;intracellular organelle;intracellular organelle part;intracellular part;membrane-bounded organelle;nuclear part;nucleoplasm;organelle;organelle part;perinuclear region of cytoplasm	5	4	4	3	4	3	4	4	4	4	4	4	14.9	28.585	P39687;F2Z3H3;H0YN26;O43423;O95626	P39687;F2Z3H3;H0YN26	Acidic leucine-rich nuclear phosphoprotein 32 family member A	25.1461	24.5929	23.884	25.639	25.0549	24.4011	25.4255	24.7775	25.4215
ANP32B	3		3D-structure;Acetylation;Alternativesplicing;Chaperone;Completeproteome;Cytoplasm;Leucine-richrepeat;Nucleus;Phosphoprotein;Referenceproteome;Repeat			cell part;cytoplasm;intracellular membrane-bounded organelle;intracellular organelle;intracellular part;membrane-bounded organelle;nucleus;organelle	5	5	4	4	5	3	5	5	5	4	5	5	19.5	28.787	Q92688;Q92688-2;Q5T6W8	Q92688;Q92688-2;Q5T6W8	Acidic leucine-rich nuclear phosphoprotein 32 family member B	25.3729	24.315	23.7464	24.8617	24.7217	24.1562	25.0184	23.9406	24.7474
ANP32E	7		Completeproteome;Cytoplasm;Leucine-richrepeat;Nucleus;Phosphoprotein;Referenceproteome;Repeat		enzyme inhibitor activity;enzyme regulator activity;phosphatase inhibitor activity;phosphatase regulator activity	cell part;cytoplasmic membrane-bounded vesicle;cytoplasmic part;cytoplasmic vesicle;intracellular membrane-bounded organelle;intracellular organelle;intracellular part;membrane-bounded organelle;membrane-bounded vesicle;nucleus;organelle;vesicle	6	6	6	5	5	2	6	6	5	5	5	5	30.2	30.692	Q9BTT0;Q5TB20;E9PLC4;Q5TB19;E9PPH5;E9PEA6;Q5TB25	Q9BTT0;Q5TB20;E9PLC4;Q5TB19;E9PPH5	Acidic leucine-rich nuclear phosphoprotein 32 family member E	23.3952	23.2708	23.3408	23.4225	23.0642	22.6875	23.8542	23.4477	23.8958
ANPEP	5	Glutathione metabolism;Hematopoietic cell lineage;Renin-angiotensin system	Aminopeptidase;Angiogenesis;Cellmembrane;Completeproteome;Cytoplasm;Developmentalprotein;Differentiation;Directproteinsequencing;Glycoprotein;Hostcellreceptorforvirusentry;Host-virusinteraction;Hydrolase;Membrane;Metal-binding;Metalloprotease;Phosphoprotein;Polymorphism;Protease;Receptor;Referenceproteome;Signal-anchor;Sulfation;Transmembrane;Transmembranehelix;Zinc	anatomical structure formation involved in morphogenesis;angiogenesis;cell differentiation;cellular developmental process;cellular process;developmental process;interspecies interaction between organisms;macromolecule metabolic process;metabolic process;multi-organism process;primary metabolic process;protein metabolic process;proteolysis	aminopeptidase activity;binding;catalytic activity;cation binding;exopeptidase activity;hydrolase activity;ion binding;metal ion binding;metallopeptidase activity;peptidase activity;peptidase activity, acting on L-amino acid peptides;receptor activity;transition metal ion binding;zinc ion binding	cell part;cytoplasmic part;cytosol;endoplasmic reticulum-Golgi intermediate compartment;integral to membrane;integral to plasma membrane;intracellular membrane-bounded organelle;intracellular organelle;intracellular part;intrinsic to membrane;intrinsic to plasma membrane;membrane part;membrane-bounded organelle;organelle;plasma membrane part	18	18	18	3	14	14	3	11	9	2	6	5	27.2	109.54	P15144;B4DP96;H0YMC1;H0YKT6;H0YLZ8	P15144;B4DP96	Aminopeptidase N	21.6173	24.3314	24.8263	20.4778	24.0146	23.7122	19.9944	23.3418	23.4784
ANXA1	3		3D-structure;Acetylation;Annexin;Calcium;Calcium/phospholipid-binding;Cellmembrane;Cellprojection;Cilium;Completeproteome;Cytoplasm;Directproteinsequencing;Isopeptidebond;Membrane;Nucleus;PhospholipaseA2inhibitor;Phosphoprotein;Referenceproteome;Repeat	alpha-beta T cell activation;alpha-beta T cell differentiation;anti-apoptosis;biological regulation;cell activation;cell differentiation;cell surface receptor linked signaling pathway;cellular component movement;cellular developmental process;cellular macromolecule metabolic process;cellular metabolic process;cellular process;cellular protein metabolic process;cellular response to stimulus;defens…	binding;binding, bridging;calcium ion binding;calcium-dependent phospholipid binding;cation binding;enzyme inhibitor activity;enzyme regulator activity;ion binding;lipase inhibitor activity;lipid binding;metal ion binding;phospholipase A2 inhibitor activity;phospholipase inhibitor activity;phospholipid binding;protein binding;protein binding, bridging;receptor binding;structural molecule activity	basolateral plasma membrane;cell part;cell projection;cilium;cornified envelope;cytoskeleton;intracellular membrane-bounded organelle;intracellular non-membrane-bounded organelle;intracellular organelle;intracellular part;membrane part;membrane-bounded organelle;non-membrane-bounded organelle;nucleus;organelle;plasma membrane part	16	16	16	12	13	16	14	12	14	12	12	11	50	38.714	P04083;Q5T3N1;Q5T3N0	P04083;Q5T3N1	Annexin A1;Annexin	26.9439	25.9531	27.1395	26.0439	25.2715	26.919	27.1949	25.9273	26.9439
ANXA11	6		Acetylation;Annexin;Calcium;Calcium/phospholipid-binding;Cellcycle;Celldivision;Completeproteome;Cytoplasm;Cytoskeleton;Nucleus;Phosphoprotein;Polymorphism;Referenceproteome;Repeat	cell cycle;cellular component organization;cellular component organization or biogenesis;cellular membrane organization;cellular process;cytokinesis, completion of separation;cytokinetic process;endocytosis;establishment of localization;membrane invagination;membrane organization;phagocytosis;response to calcium ion;response to chemical stimulus;response to inorganic substance;response to metal i…	binding;calcium ion binding;calcium-dependent phospholipid binding;calcium-dependent protein binding;cation binding;ion binding;lipid binding;metal ion binding;phospholipid binding;protein binding;S100 alpha binding	azurophil granule;cell part;cytoplasmic membrane-bounded vesicle;cytoplasmic part;cytoplasmic vesicle;cytoskeletal part;endocytic vesicle;envelope;intracellular membrane-bounded organelle;intracellular non-membrane-bounded organelle;intracellular organelle;intracellular organelle part;intracellular part;lysosome;lytic vacuole;melanosome;membrane-bounded organelle;membrane-bounded vesicle;midbody;…	12	12	12	6	8	8	8	8	9	6	7	5	23.8	54.389	P50995;B4DVE7;E9PDK5;E9PDS7;H0Y6E1;Q5T0G9	P50995;B4DVE7;E9PDK5	Annexin A11;Annexin	24.2864	23.3324	22.8606	24.1534	23.6105	23.2683	24.1703	23.1827	22.7912
ANXA2;ANXA2P2	20		3D-structure;Acetylation;Alternativesplicing;Annexin;Basementmembrane;Calcium;Calcium/phospholipid-binding;Completeproteome;Directproteinsequencing;Extracellularmatrix;Phosphoprotein;Polymorphism;Referenceproteome;Repeat;Secreted;Ublconjugation	anatomical structure development;anatomical structure formation involved in morphogenesis;angiogenesis;biological regulation;developmental process;positive regulation of biological process;positive regulation of cellular component organization;positive regulation of cellular process;positive regulation of organelle organization;positive regulation of transport;positive regulation of vesicle fusio…	binding;calcium ion binding;calcium-dependent phospholipid binding;cation binding;cytoskeletal protein binding;enzyme inhibitor activity;enzyme regulator activity;ion binding;lipase inhibitor activity;lipid binding;metal ion binding;phospholipase inhibitor activity;phospholipid binding;protein binding	basement membrane;cell fraction;cell part;cytoplasmic membrane-bounded vesicle;cytoplasmic part;cytoplasmic vesicle;extracellular matrix part;extracellular region part;intracellular membrane-bounded organelle;intracellular organelle;intracellular part;melanosome;membrane-bounded organelle;membrane-bounded vesicle;midbody;organelle;pigment granule;soluble fraction;vesicle	23	23	11	14	17	18	15	10	18	15	10	17	58.3	40.411	P07355-2;P07355;H0YN42;H0YMU9;H0YMD0;A6NMY6;H0YKS4;H0YM50;H0YNP5;H0YMM1;H0YMW4;H0YKX9;H0YMT9;H0YLV6;H0YKZ7;H0YKL9;H0YKV8;H0YMD9;H0YKN4;H0YNB8	P07355-2;P07355;H0YN42;H0YMU9;H0YMD0;A6NMY6;H0YKS4;H0YM50;H0YNP5;H0YMM1	Annexin A2;Annexin;Putative annexin A2-like protein	25.6849	25.0367	26.489	24.8891	24.0237	26.2094	24.9642	24.5012	26.1802
ANXA3	5		3D-structure;Acetylation;Annexin;Calcium;Calcium/phospholipid-binding;Completeproteome;Directproteinsequencing;PhospholipaseA2inhibitor;Polymorphism;Referenceproteome;Repeat	biological regulation;cell activation;cell activation involved in immune response;cellular component organization;cellular component organization or biogenesis;cellular membrane organization;cellular process;defense response;defense response to bacterium;endocytosis;establishment of localization;establishment of localization in cell;exocytosis;immune effector process;immune system process;leukocy…	binding;calcium ion binding;calcium-dependent phospholipid binding;cation binding;enzyme inhibitor activity;enzyme regulator activity;ion binding;lipase inhibitor activity;lipid binding;metal ion binding;phospholipase A2 inhibitor activity;phospholipase inhibitor activity;phospholipid binding	cell part;cytoplasm;cytoplasmic membrane-bounded vesicle;cytoplasmic part;cytoplasmic vesicle;cytoplasmic vesicle membrane;cytoplasmic vesicle part;endocytic vesicle membrane;intracellular membrane-bounded organelle;intracellular organelle;intracellular organelle part;intracellular part;membrane;membrane-bounded organelle;membrane-bounded vesicle;organelle;organelle membrane;organelle part;phagoc…	9	9	9	5	0	3	7	2	2	9	1	3	33.7	36.375	P12429;D6RA82;D6RFG5;D6RCA8;D6RAZ8	P12429;D6RA82;D6RFG5	Annexin A3;Annexin	22.2298	NaN	20.5524	22.88	19.9625	20.8307	24.9764	NaN	21.3993
ANXA4	3		3D-structure;Acetylation;Annexin;Calcium;Calcium/phospholipid-binding;Completeproteome;Directproteinsequencing;Phosphoprotein;Polymorphism;Referenceproteome;Repeat	anti-apoptosis;biological regulation;cellular process;cellular response to stimulus;negative regulation of apoptosis;negative regulation of biological process;negative regulation of cell death;negative regulation of cellular process;negative regulation of coagulation;negative regulation of multicellular organismal process;negative regulation of programmed cell death;regulation of apoptosis;regula…	binding;calcium ion binding;calcium-dependent phospholipid binding;cation binding;enzyme inhibitor activity;enzyme regulator activity;ion binding;lipase inhibitor activity;lipid binding;metal ion binding;phospholipase inhibitor activity;phospholipid binding	cell part;cytoplasm;intracellular part	8	8	8	6	6	5	8	6	6	6	6	6	27.9	35.882	P09525;Q6P452;B4DDF9	P09525;Q6P452;B4DDF9	Annexin A4;Annexin	23.9047	22.2529	21.8531	24.1707	22.6813	22.7617	24.059	21.8434	22.1677
ANXA5	6		3D-structure;Acetylation;Annexin;Bloodcoagulation;Calcium;Calcium/phospholipid-binding;Completeproteome;Directproteinsequencing;Hemostasis;Phosphoprotein;Referenceproteome;Repeat	anti-apoptosis;biological regulation;blood coagulation;cellular process;cellular response to stimulus;coagulation;hemostasis;multicellular organismal process;negative regulation of apoptosis;negative regulation of biological process;negative regulation of cell death;negative regulation of cellular process;negative regulation of coagulation;negative regulation of multicellular organismal process;n…	binding;calcium ion binding;calcium-dependent phospholipid binding;cation binding;enzyme inhibitor activity;enzyme regulator activity;ion binding;lipase inhibitor activity;lipid binding;metal ion binding;phospholipase inhibitor activity;phospholipid binding	cell part;cytoplasm;intracellular part	18	18	18	12	12	14	12	10	14	12	12	14	62.5	35.936	P08758;D6RBL5;E7ENQ5;D6RBE9;E9PHT9;D6RCN3	P08758;D6RBL5;E7ENQ5;D6RBE9	Annexin A5;Annexin	25.8425	25.4296	26.3148	26.2312	24.5108	26.0391	26.515	24.5507	26.896
ANXA6	13		3D-structure;Acetylation;Annexin;Calcium;Calcium/phospholipid-binding;Completeproteome;Cytoplasm;Directproteinsequencing;Phosphoprotein;Referenceproteome;Repeat		binding;calcium ion binding;calcium-dependent phospholipid binding;cation binding;ion binding;lipid binding;metal ion binding;phospholipid binding;protein binding	cell part;cytoplasmic membrane-bounded vesicle;cytoplasmic part;cytoplasmic vesicle;intracellular membrane-bounded organelle;intracellular organelle;intracellular part;melanosome;membrane-bounded organelle;membrane-bounded vesicle;organelle;pigment granule;vesicle	27	27	27	18	24	20	21	18	19	17	15	14	49.6	75.872	P08133;E9PGK1;A6NN80;B7Z582;E5RK69;E7EMC6;E5RFF0;E5RK63;E5RJF5;E5RI05;E5RJR0;E5RIU8;H0YC77	P08133;E9PGK1;A6NN80;B7Z582;E5RK69;E7EMC6	Annexin A6;Annexin	27.0495	25.8098	25.2356	27.4234	25.9595	25.5056	27.033	25.3998	25.216
ANXA7	4		Acetylation;Alternativesplicing;Annexin;Calcium;Calcium/phospholipid-binding;Completeproteome;Directproteinsequencing;Polymorphism;Referenceproteome;Repeat	behavior;behavioral interaction between organisms;multi-organism process;response to stimulus;social behavior	binding;calcium ion binding;calcium-dependent phospholipid binding;calcium-dependent protein binding;cation binding;ion binding;lipid binding;metal ion binding;phospholipid binding;protein binding		9	9	9	6	6	6	7	5	5	5	4	5	17.6	52.739	P20073;P20073-2;B4DHY4;B4DT77	P20073;P20073-2;B4DHY4;B4DT77	Annexin A7;Annexin	24.2643	23.5363	23.3742	24.3766	23.5375	23.3013	24.2518	23.5051	23.1431
AP1B1	6	Lysosome	Acetylation;Alternativesplicing;Completeproteome;Cytoplasmicvesicle;Endocytosis;Golgiapparatus;Membrane;Phosphoprotein;Polymorphism;Proteintransport;Referenceproteome;Transport	biological regulation;cellular component organization;cellular component organization or biogenesis;cellular membrane organization;cellular process;endocytosis;establishment of localization;establishment of localization in cell;establishment of protein localization;Golgi vesicle transport;intracellular protein transport;intracellular transport;membrane invagination;membrane organization;post-Golg…	binding;protein binding;protein transporter activity;substrate-specific transporter activity;transporter activity	AP-type membrane coat adaptor complex;cell part;clathrin adaptor complex;clathrin coated vesicle membrane;coated vesicle membrane;cytoplasmic part;cytoplasmic vesicle membrane;cytoplasmic vesicle part;cytosol;Golgi apparatus part;Golgi membrane;intracellular organelle part;intracellular part;lysosomal membrane;macromolecular complex;membrane;membrane coat;membrane part;organelle membrane;organell…	19	19	11	12	15	12	8	12	13	14	13	16	26.8	104.64	Q10567;Q10567-2;Q10567-3;F8WDL0;C9J1E7;H7C034	Q10567;Q10567-2;Q10567-3;F8WDL0;C9J1E7	AP-1 complex subunit beta-1	23.8064	24.4273	24.7572	23.979	24.2198	24.103	24.3152	24.293	24.8503
AP1G1	13	Lysosome	3D-structure;Acetylation;Alternativesplicing;Completeproteome;Cytoplasmicvesicle;Endocytosis;Golgiapparatus;Membrane;Polymorphism;Proteintransport;Referenceproteome;Transport	biological regulation;cellular component organization;cellular component organization or biogenesis;cellular membrane organization;cellular process;endocytosis;establishment of localization;establishment of localization in cell;establishment of protein localization;Golgi vesicle transport;intracellular protein transport;intracellular transport;membrane invagination;membrane organization;post-Golg…	binding;cytoskeletal protein binding;kinesin binding;protein binding;protein transporter activity;substrate-specific transporter activity;transporter activity	AP-type membrane coat adaptor complex;cell part;clathrin adaptor complex;clathrin coated vesicle membrane;coated vesicle membrane;cytoplasmic part;cytoplasmic vesicle membrane;cytoplasmic vesicle part;cytosol;endosome;Golgi apparatus;Golgi apparatus part;Golgi membrane;intracellular membrane-bounded organelle;intracellular organelle;intracellular organelle part;intracellular part;lysosomal membra…	8	8	8	0	5	6	1	3	2	3	1	3	12.8	94.139	B3KXW5;O43747-2;O43747;E7EUH1;F5GZV5;B3KNW1;H3BNN2;H3BNR4;H3BUN9;H3BR36;B4DGE1;H3BN71;H3BRM7	B3KXW5;O43747-2;O43747;E7EUH1	AP-1 complex subunit gamma-1	NaN	21.2782	21.5911	NaN	20.5227	22.3841	NaN	NaN	21.4206
AP1G2	6		3D-structure;Completeproteome;Cytoplasmicvesicle;Endosome;Golgiapparatus;Host-virusinteraction;Membrane;Polymorphism;Proteintransport;Referenceproteome;Transport	cellular process;establishment of localization;establishment of localization in cell;establishment of protein localization;interspecies interaction between organisms;intracellular protein transport;intracellular transport;multi-organism process;protein transport;transport;vesicle-mediated transport	binding;protein binding;protein transporter activity;substrate-specific transporter activity;transporter activity	AP-1 adaptor complex;AP-type membrane coat adaptor complex;cell part;clathrin adaptor complex;cytoplasmic membrane-bounded vesicle;cytoplasmic part;cytoplasmic vesicle;cytoplasmic vesicle part;endosomal part;endosome membrane;Golgi apparatus;Golgi apparatus part;Golgi-associated vesicle;intracellular membrane-bounded organelle;intracellular organelle;intracellular organelle part;intracellular par…	4	4	4	2	3	2	1	3	3	2	3	2	6.6	87.116	O75843;Q86V28;B4E3E1;G3V532;G3V3Z2;G3V2V9	O75843;Q86V28;B4E3E1;G3V532	AP-1 complex subunit gamma-like 2	19.3521	19.6298	20.0608	NaN	19.8285	19.898	19.5643	19.5119	19.9003
AP1M1	6	Lysosome	Acetylation;Alternativesplicing;Completeproteome;Cytoplasmicvesicle;Directproteinsequencing;Golgiapparatus;Host-virusinteraction;Membrane;Phosphoprotein;Polymorphism;Proteintransport;Referenceproteome;Transport	biological regulation;cellular component organization;cellular component organization at cellular level;cellular component organization or biogenesis;cellular component organization or biogenesis at cellular level;cellular membrane organization;cellular process;endosome to melanosome transport;endosome transport;establishment of localization;establishment of localization in cell;establishment of …	binding;protein binding	AP-type membrane coat adaptor complex;cell part;clathrin adaptor complex;clathrin coated vesicle membrane;coated vesicle membrane;cytoplasmic part;cytoplasmic vesicle membrane;cytoplasmic vesicle part;cytosol;Golgi apparatus part;Golgi membrane;intracellular organelle part;intracellular part;lysosomal membrane;macromolecular complex;membrane;membrane part;organelle membrane;organelle part;protein…	8	8	8	5	4	6	3	6	5	4	6	6	24.8	49.84	Q9BXS5-2;Q9BXS5;B4DDG7;E7ENJ6;Q9Y6Q5-2;Q9Y6Q5	Q9BXS5-2;Q9BXS5;B4DDG7;E7ENJ6	AP-1 complex subunit mu-1	21.4261	21.4926	22.2734	21.2344	21.2032	22.3324	22.0149	21.6469	21.7936
AP2A1	2	Endocrine and other factor-regulated calcium reabsorption;Endocytosis;Huntington's disease	Alternativesplicing;Cellmembrane;Coatedpit;Completeproteome;Endocytosis;Membrane;Phosphoprotein;Polymorphism;Proteintransport;Referenceproteome;Transport	axon guidance;biological regulation;cell communication;cell surface receptor linked signaling pathway;cell-cell signaling;cellular component organization;cellular component organization or biogenesis;cellular membrane organization;cellular process;cellular response to stimulus;chemotaxis;endocytosis;endosome transport;enzyme linked receptor protein signaling pathway;epidermal growth factor recept…	protein transporter activity;substrate-specific transporter activity;transporter activity	AP-2 adaptor complex;AP-type membrane coat adaptor complex;cell part;clathrin adaptor complex;clathrin coat;clathrin coat of trans-Golgi network vesicle;clathrin vesicle coat;cytoplasmic part;cytoplasmic vesicle part;cytosol;Golgi apparatus part;intracellular organelle part;intracellular part;macromolecular complex;membrane coat;membrane part;organelle part;plasma membrane part;protein complex;ve…	16	16	13	6	9	10	2	7	6	5	5	6	21	107.54	O95782;O95782-2	O95782;O95782-2	AP-2 complex subunit alpha-1	22.0349	21.6527	21.6482	20.136	21.6498	21.543	21.3982	21.6537	22.127
AP2A2	12	Endocrine and other factor-regulated calcium reabsorption;Endocytosis;Huntington's disease	Acetylation;Alternativesplicing;Cellmembrane;Coatedpit;Completeproteome;Endocytosis;Lipid-binding;Membrane;Phosphoprotein;Proteintransport;Referenceproteome;Transport	axon guidance;biological regulation;cell communication;cell surface receptor linked signaling pathway;cell-cell signaling;cellular component organization;cellular component organization or biogenesis;cellular membrane organization;cellular process;cellular response to stimulus;chemotaxis;endocytosis;enzyme linked receptor protein signaling pathway;epidermal growth factor receptor signaling pathwa…	binding;lipid binding;protein transporter activity;substrate-specific transporter activity;transporter activity	AP-2 adaptor complex;AP-type membrane coat adaptor complex;cell part;clathrin adaptor complex;cytoplasmic part;cytoplasmic vesicle part;cytosol;intracellular organelle part;intracellular part;macromolecular complex;membrane coat;membrane part;organelle part;plasma membrane part;protein complex	11	8	8	3	5	8	0	3	3	1	0	2	16.6	104.09	O94973-2;O94973;E7ESQ4;E9PJJ7;C9J1S3;O94973-3;E9PR62;E7EVC3;E9PBJ2;H0YDE9;H0YEG0;E9PQP4	O94973-2;O94973;E7ESQ4;E9PJJ7;C9J1S3;O94973-3	AP-2 complex subunit alpha-2	NaN	19.761	20.8918	NaN	NaN	NaN	NaN	NaN	19.1859
AP2B1	4	Endocrine and other factor-regulated calcium reabsorption;Endocytosis;Huntington's disease	3D-structure;Acetylation;Alternativesplicing;Cellmembrane;Coatedpit;Completeproteome;Membrane;Phosphoprotein;Proteintransport;Referenceproteome;Transport	axon guidance;biological regulation;cell communication;cell surface receptor linked signaling pathway;cell-cell signaling;cellular process;cellular response to stimulus;chemotaxis;enzyme linked receptor protein signaling pathway;epidermal growth factor receptor signaling pathway;establishment of localization;establishment of localization in cell;establishment of protein localization;intracellular…	binding;clathrin binding;protein binding;protein transporter activity;substrate-specific transporter activity;transporter activity	AP-type membrane coat adaptor complex;cell part;clathrin adaptor complex;coated pit;cytoplasmic part;cytoplasmic vesicle membrane;cytoplasmic vesicle part;cytosol;endocytic vesicle membrane;intracellular organelle part;intracellular part;macromolecular complex;membrane;membrane part;organelle membrane;organelle part;plasma membrane;protein complex;vesicle membrane	18	10	10	8	13	11	9	13	10	12	9	9	24.1	105.69	P63010-2;P63010;Q7Z451;F5GYG9	P63010-2;P63010;Q7Z451;F5GYG9	AP-2 complex subunit beta	22.1101	22.6098	22.5106	22.4756	22.3646	22.1659	22.5858	22.54	22.6074
AP2M1	8	Endocrine and other factor-regulated calcium reabsorption;Endocytosis;Huntington's disease	3D-structure;Alternativesplicing;Cellmembrane;Coatedpit;Completeproteome;Lipid-binding;Membrane;Phosphoprotein;Proteintransport;Referenceproteome;Transport	axon guidance;biological regulation;cell communication;cell surface receptor linked signaling pathway;cell-cell signaling;cellular component organization;cellular component organization or biogenesis;cellular membrane organization;cellular process;cellular response to stimulus;chemotaxis;enzyme linked receptor protein signaling pathway;epidermal growth factor receptor signaling pathway;establishm…	binding;lipid binding;protein binding;transporter activity	AP-type membrane coat adaptor complex;cell part;clathrin adaptor complex;clathrin coat;clathrin coat of coated pit;cytoplasmic part;cytoplasmic vesicle membrane;cytoplasmic vesicle part;cytosol;endocytic vesicle membrane;intracellular organelle part;intracellular part;lysosomal membrane;macromolecular complex;membrane;membrane coat;membrane part;organelle membrane;organelle part;plasma membrane p…	4	4	4	0	1	1	1	1	2	1	2	3	9.1	52.303	E9PFW3;Q96CW1;Q96CW1-2;F5H0H0;B4DJB1;C9JJ47;C9JGT8;C9JTK4	E9PFW3;Q96CW1;Q96CW1-2;F5H0H0;B4DJB1;C9JJ47	AP-2 complex subunit mu	NaN	NaN	NaN	NaN	NaN	20.5262	NaN	19.0939	21.6649
AP2S1	2	Endocrine and other factor-regulated calcium reabsorption;Endocytosis;Huntington's disease	Alternativesplicing;Cellmembrane;Coatedpit;Completeproteome;Membrane;Phosphoprotein;Proteintransport;Referenceproteome;Transport	axon guidance;biological regulation;cell communication;cell surface receptor linked signaling pathway;cell-cell signaling;cellular component assembly;cellular component assembly at cellular level;cellular component organization;cellular component organization at cellular level;cellular component organization or biogenesis;cellular component organization or biogenesis at cellular level;cellular ma…	protein transporter activity;substrate-specific transporter activity;transporter activity	AP-2 adaptor complex;AP-type membrane coat adaptor complex;cell part;clathrin adaptor complex;cytoplasmic part;cytoplasmic vesicle part;cytosol;intracellular organelle part;intracellular part;macromolecular complex;membrane part;organelle part;plasma membrane part;protein complex	2	2	2	0	2	2	0	1	1	1	1	1	16.9	17.018	P53680;P53680-2	P53680;P53680-2	AP-2 complex subunit sigma	NaN	19.4794	18.0659	NaN	NaN	NaN	NaN	NaN	NaN
AP3B1	5	Lysosome	Acetylation;Albinism;Alternativesplicing;Completeproteome;Cytoplasmicvesicle;Diseasemutation;Endocytosis;Golgiapparatus;Hermansky-Pudlaksyndrome;Membrane;Phosphoprotein;Proteintransport;Referenceproteome;Transport	cellular component organization;cellular component organization at cellular level;cellular component organization or biogenesis;cellular component organization or biogenesis at cellular level;cellular membrane organization;cellular process;endocytosis;establishment of localization;establishment of localization in cell;establishment of protein localization;intracellular protein transport;intracell…	binding;enzyme binding;phosphatase binding;protein binding;protein phosphatase binding;protein transporter activity;substrate-specific transporter activity;transporter activity	cell part;clathrin coated vesicle membrane;coated vesicle membrane;cytoplasmic part;cytoplasmic vesicle membrane;cytoplasmic vesicle part;Golgi apparatus;intracellular membrane-bounded organelle;intracellular organelle;intracellular organelle part;intracellular part;macromolecular complex;membrane;membrane coat;membrane part;membrane-bounded organelle;organelle;organelle membrane;organelle part;p…	10	10	9	7	5	6	5	5	8	8	6	6	10.6	121.32	O00203;E5RJ68;F5GXG9;F5H093;H0YBD0	O00203;E5RJ68;F5GXG9;F5H093	AP-3 complex subunit beta-1	21.7789	21.9384	22.4565	21.2168	21.7662	22.168	21.7704	21.38	22.5561
AP3D1	7	Lysosome	Alternativesplicing;Coiledcoil;Completeproteome;Cytoplasm;Golgiapparatus;Membrane;Phosphoprotein;Polymorphism;Proteintransport;Referenceproteome;Repeat;Transport	biological regulation;biosynthetic process;cellular process;establishment of localization;establishment of localization in cell;establishment of protein localization;eye pigment biosynthetic process;eye pigment metabolic process;intracellular protein transport;intracellular transport;metabolic process;pigment biosynthetic process;pigment metabolic process;pigment metabolic process involved in dev…	binding;protein transporter activity;substrate-specific transporter activity;transporter activity	cell part;cytoplasmic part;endosomal part;endosome membrane;Golgi apparatus;Golgi apparatus part;Golgi membrane;intracellular membrane-bounded organelle;intracellular organelle;intracellular organelle part;intracellular part;macromolecular complex;membrane;membrane coat;membrane part;membrane-bounded organelle;organelle;organelle membrane;organelle part;protein complex	6	6	6	1	3	2	0	3	2	1	2	3	6.2	136.65	O14617-5;O14617;G5E988;O14617-2;E7EMM2;O14617-3;O14617-4	O14617-5;O14617;G5E988;O14617-2;E7EMM2;O14617-3;O14617-4	AP-3 complex subunit delta-1	NaN	19.7632	19.6057	NaN	NaN	19.9108	NaN	19.5922	20.0654
AP3M1	4	Lysosome	Completeproteome;Golgiapparatus;Proteintransport;Referenceproteome;Transport	cellular process;establishment of localization;establishment of localization in cell;establishment of protein localization;establishment of protein localization to organelle;establishment of protein localization to vacuole;intracellular protein transport;intracellular transport;lysosomal transport;protein targeting;protein targeting to lysosome;protein targeting to vacuole;protein transport;trans…	binding;protein binding	AP-type membrane coat adaptor complex;cell part;clathrin adaptor complex;cytoplasmic part;Golgi apparatus;intracellular membrane-bounded organelle;intracellular organelle;intracellular part;lysosome;lytic vacuole;macromolecular complex;membrane part;membrane-bounded organelle;organelle;protein complex;vacuole	3	3	3	1	2	0	0	1	3	2	1	3	11.2	46.939	Q9Y2T2;P53677;E5RJ52;H0YBM0	Q9Y2T2	AP-3 complex subunit mu-1	NaN	20.7946	NaN	NaN	NaN	20.8875	20.2842	NaN	20.8498
AP3S1	2	Lysosome	Completeproteome;Cytoplasmicvesicle;Golgiapparatus;Membrane;Polymorphism;Proteintransport;Referenceproteome;Transport	biological regulation;cell surface receptor linked signaling pathway;cellular process;cellular response to chemical stimulus;cellular response to endogenous stimulus;cellular response to hormone stimulus;cellular response to insulin stimulus;cellular response to organic substance;cellular response to peptide hormone stimulus;cellular response to stimulus;enzyme linked receptor protein signaling p…	binding;protein binding;protein transporter activity;substrate-specific transporter activity;transporter activity	AP-type membrane coat adaptor complex;cell part;cytoplasmic membrane-bounded vesicle;cytoplasmic part;cytoplasmic vesicle;cytoplasmic vesicle membrane;cytoplasmic vesicle part;Golgi apparatus;intracellular membrane-bounded organelle;intracellular organelle;intracellular organelle part;intracellular part;macromolecular complex;membrane;membrane coat;membrane part;membrane-bounded organelle;membran…	3	3	3	1	3	3	1	1	1	0	2	1	16.6	21.732	Q92572;F5H459	Q92572;F5H459	AP-3 complex subunit sigma-1	NaN	19.0907	19.6584	NaN	NaN	NaN	NaN	19.6875	NaN
APAF1	7	Alzheimer's disease;Amyotrophic lateral sclerosis (ALS);Apoptosis;Huntington's disease;ko05152;p53 signaling pathway;Parkinson's disease;Small cell lung cancer	3D-structure;Alternativesplicing;Apoptosis;ATP-binding;Completeproteome;Cytoplasm;Directproteinsequencing;Nucleotide-binding;Phosphoprotein;Referenceproteome;Repeat;WDrepeat	activation of caspase activity;activation of caspase activity by cytochrome c;anatomical structure development;biological regulation;defense response;developmental process;induction of apoptosis;induction of apoptosis by intracellular signals;induction of programmed cell death;nervous system development;positive regulation of apoptosis;positive regulation of biological process;positive regulation…	adenyl nucleotide binding;adenyl ribonucleotide binding;ADP binding;apoptotic protease activator activity;ATP binding;binding;caspase activator activity;caspase regulator activity;enzyme activator activity;enzyme regulator activity;nucleotide binding;peptidase activator activity;peptidase regulator activity;protein binding;purine nucleotide binding;purine ribonucleoside triphosphate binding;purin…	apoptosome;cell part;cytoplasmic part;cytosolic part;Golgi apparatus;intracellular membrane-bounded organelle;intracellular organelle;intracellular part;macromolecular complex;membrane-bounded organelle;nucleus;organelle;protein complex	2	2	2	0	1	2	1	0	1	1	2	1	1.6	141.84	O14727;O14727-4;O14727-5;C9JLV4;O14727-6;O14727-2;O14727-3	O14727;O14727-4;O14727-5;C9JLV4;O14727-6;O14727-2;O14727-3	Apoptotic protease-activating factor 1	NaN	NaN	20.3454	NaN	NaN	NaN	NaN	18.6327	NaN
APBB1IP	4		Celljunction;Cellmembrane;Cellprojection;Completeproteome;Cytoplasm;Cytoskeleton;Membrane;Phosphoprotein;Polymorphism;Referenceproteome	biological regulation;cell activation;cellular process;cellular response to stimulus;platelet activation;regulation of biological process;regulation of cellular process;response to stimulus;signal transduction		adherens junction;anchoring junction;cell junction;cell part;cell projection;cell-substrate adherens junction;cell-substrate junction;cytoplasmic part;cytoskeleton;cytosol;focal adhesion;intracellular non-membrane-bounded organelle;intracellular organelle;intracellular part;lamellipodium;non-membrane-bounded organelle;organelle	6	6	6	2	4	5	1	1	2	1	2	3	12.8	73.182	Q7Z5R6;B4E100;Q9NWJ6;Q8IYL7	Q7Z5R6;B4E100	Amyloid beta A4 precursor protein-binding family B member 1-interacting protein	21.3886	19.8468	21.4051	NaN	NaN	21.3281	NaN	20.5067	21.6595
APEH	6		Acetylation;Completeproteome;Cytoplasm;Directproteinsequencing;Hydrolase;Phosphoprotein;Polymorphism;Referenceproteome	macromolecule metabolic process;metabolic process;primary metabolic process;protein metabolic process;proteolysis	catalytic activity;endopeptidase activity;hydrolase activity;peptidase activity;peptidase activity, acting on L-amino acid peptides;serine hydrolase activity;serine-type endopeptidase activity;serine-type peptidase activity	cell part;cytoplasm;intracellular organelle part;intracellular part;membrane;nuclear membrane;nuclear part;organelle membrane;organelle part	11	11	11	7	11	10	10	9	9	8	10	9	22.5	81.673	C9JIF9;P13798;H7C1U0;H7C393;C9JLK2;F8WEH5	C9JIF9;P13798	Acylamino-acid-releasing enzyme	24.1043	24.4579	24.2661	24.4377	24.7167	24.4453	24.4721	24.6394	24.8174
APEX1	9	Base excision repair	3D-structure;Acetylation;Activator;Cleavageonpairofbasicresidues;Completeproteome;Cytoplasm;Directproteinsequencing;Disulfidebond;DNA-binding;DNAdamage;DNArecombination;DNArepair;Endonuclease;Endoplasmicreticulum;Exonuclease;Hydrolase;Lyase;Magnesium;Metal-binding;Mitochondrion;Nuclease;Nucleus;Phosphoprotein;Polymorphism;Referenceproteome;Repressor;RNA-binding;S-nitrosylation;Transcription;Trans…	base-excision repair;biological regulation;biosynthetic process;cellular biosynthetic process;cellular macromolecule biosynthetic process;cellular macromolecule metabolic process;cellular metabolic process;cellular nitrogen compound metabolic process;cellular process;cellular response to stimulus;cellular response to stress;demethylation;DNA dealkylation;DNA demethylation;DNA metabolic process;DN…	3'-5' exonuclease activity;binding;carbon-oxygen lyase activity;catalytic activity;cation binding;chromatin binding;chromatin DNA binding;damaged DNA binding;deoxyribonuclease activity;DNA binding;DNA N-glycosylase activity;DNA-(apurinic or apyrimidinic site) lyase activity;endodeoxyribonuclease activity;endonuclease activity;endonuclease activity, active with either ribo- or deoxyribonucleic aci…	cell part;centrosome;cytoplasmic part;cytoskeletal part;endoplasmic reticulum;intracellular;intracellular membrane-bounded organelle;intracellular non-membrane-bounded organelle;intracellular organelle;intracellular organelle part;intracellular part;macromolecular complex;membrane-bounded organelle;microtubule organizing center;mitochondrion;non-membrane-bounded organelle;nuclear body;nuclear par…	8	8	8	5	6	8	4	4	4	5	4	4	25.8	35.554	P27695;G3V3M6;G3V5Q1;G3V3C7;G3V359;G3V5M0;G3V5D9;G3V3Y6;H7C4A8	P27695;G3V3M6;G3V5Q1;G3V3C7;G3V359;G3V5M0;G3V5D9	DNA-(apurinic or apyrimidinic site) lyase;DNA-(apurinic or apyrimidinic site) lyase, mitochondrial	23.7159	23.119	23.6572	23.4373	22.1904	23.7761	22.7778	24.1791	23.6571
API5	9		Acetylation;Alternativesplicing;Apoptosis;Completeproteome;Cytoplasm;Directproteinsequencing;Nucleus;Phosphoprotein;Polymorphism;Referenceproteome	anti-apoptosis;apoptosis;biological regulation;cell death;cellular process;death;negative regulation of apoptosis;negative regulation of biological process;negative regulation of cell death;negative regulation of cellular process;negative regulation of programmed cell death;programmed cell death;regulation of apoptosis;regulation of biological process;regulation of cell death;regulation of cellul…	binding;fibroblast growth factor binding;growth factor binding;protein binding	cell part;cytoplasm;intracellular organelle part;intracellular part;macromolecular complex;nuclear part;organelle part;ribonucleoprotein complex;spliceosomal complex	9	9	9	5	7	9	2	6	4	5	6	5	22.2	56.769	Q9BZZ5-2;Q9BZZ5;G3V1C3;Q9BZZ5-3;Q9BZZ5-5;B4DDR3;Q9BZZ5-1;E9PQK6;H0YER7	Q9BZZ5-2;Q9BZZ5;G3V1C3;Q9BZZ5-3;Q9BZZ5-5;B4DDR3	Apoptosis inhibitor 5	23.5617	23.4252	23.7247	NaN	23.5927	23.7523	23.3931	23.3943	23.3529
APIP	2	Cysteine and methionine metabolism	Amino-acidbiosynthesis;Apoptosis;Completeproteome;Cytoplasm;Lyase;Metal-binding;Methioninebiosynthesis;Polymorphism;Referenceproteome;Zinc	amine biosynthetic process;amine metabolic process;amino acid salvage;apoptosis;aspartate family amino acid biosynthetic process;aspartate family amino acid metabolic process;biosynthetic process;carboxylic acid biosynthetic process;carboxylic acid metabolic process;cell death;cellular amine metabolic process;cellular amino acid biosynthetic process;cellular amino acid metabolic process;cellular …	binding;carbon-oxygen lyase activity;catalytic activity;cation binding;hydro-lyase activity;identical protein binding;ion binding;lyase activity;metal ion binding;methylthioribulose 1-phosphate dehydratase activity;protein binding	cell part;cytoplasm;cytoplasmic part;cytosol;intracellular part	4	4	4	3	2	3	2	3	3	4	2	3	24.4	27.125	Q96GX9;C9JEQ4	Q96GX9;C9JEQ4	Probable methylthioribulose-1-phosphate dehydratase	20.7853	20.246	20.4902	20.9944	20.047	20.0421	20.9627	20.0335	20.9902
APMAP;C20orf3	3		Alternativesplicing;Completeproteome;Glycoprotein;Membrane;Polymorphism;Referenceproteome;Signal-anchor;Transmembrane;Transmembranehelix	biosynthetic process;metabolic process	amine-lyase activity;arylesterase activity;carbon-nitrogen lyase activity;carboxylic ester hydrolase activity;catalytic activity;hydrolase activity;hydrolase activity, acting on ester bonds;lyase activity;strictosidine synthase activity	cell part;cell surface;integral to membrane;intrinsic to membrane;membrane part	7	7	7	3	5	4	6	5	5	6	5	4	23.3	46.48	Q9HDC9;H0Y512;Q9HDC9-2	Q9HDC9;H0Y512;Q9HDC9-2	Adipocyte plasma membrane-associated protein	23.05	22.7557	23.382	23.0185	22.1763	23.2545	23.2236	21.8146	21.8868
APOA2	1	PPAR signaling pathway	3D-structure;Cleavageonpairofbasicresidues;Completeproteome;Directproteinsequencing;Disulfidebond;HDL;Host-virusinteraction;Lipidtransport;Phosphoprotein;Pyrrolidonecarboxylicacid;Referenceproteome;Secreted;Signal;Transport	acylglycerol catabolic process;acylglycerol metabolic process;alcohol metabolic process;amine metabolic process;biological regulation;biosynthetic process;catabolic process;cellular amine metabolic process;cellular biogenic amine metabolic process;cellular biosynthetic process;cellular catabolic process;cellular component assembly;cellular component organization;cellular component organization or…	alcohol binding;amine binding;apolipoprotein receptor binding;binding;cation binding;cholesterol binding;enzyme activator activity;enzyme inhibitor activity;enzyme regulator activity;high-density lipoprotein particle receptor binding;identical protein binding;ion binding;lipase inhibitor activity;lipid binding;lipoprotein particle receptor binding;phosphatidylcholine binding;phosphatidylcholine-s…	cell part;chylomicron;cytoplasmic part;endoplasmic reticulum lumen;endoplasmic reticulum part;extracellular region part;high-density lipoprotein particle;intracellular organelle lumen;intracellular organelle part;intracellular part;macromolecular complex;membrane-enclosed lumen;organelle lumen;organelle part;plasma lipoprotein particle;protein-lipid complex;spherical high-density lipoprotein part…	4	4	4	2	0	0	2	2	1	2	1	2	43	11.175	P02652	P02652	Apolipoprotein A-II;Truncated apolipoprotein A-II	25.6048	NaN	NaN	25.921	22.721	NaN	22.1046	NaN	20.5037
APOB	2	Fat digestion and absorption;Vitamin digestion and absorption	Acetylation;Atherosclerosis;Cholesterolmetabolism;Chylomicron;Completeproteome;Directproteinsequencing;Diseasemutation;Disulfidebond;Glycoprotein;Heparin-binding;LDL;Lipidmetabolism;Lipidtransport;Lipoprotein;Palmitate;Phosphoprotein;Polymorphism;Referenceproteome;RNAediting;Secreted;Signal;Steroidmetabolism;Transport;VLDL	alcohol metabolic process;biological regulation;blood coagulation;cell migration;cell motility;cellular component assembly;cellular component movement;cellular component organization;cellular component organization or biogenesis;cellular membrane organization;cellular process;chemical homeostasis;cholesterol homeostasis;cholesterol metabolic process;coagulation;endocytosis;establishment of locali…	binding;carbohydrate binding;cholesterol transporter activity;enzyme binding;glycosaminoglycan binding;heparin binding;lipid binding;lipid transporter activity;lipoprotein particle receptor binding;low-density lipoprotein particle receptor binding;pattern binding;phospholipid binding;polysaccharide binding;protein binding;protein dimerization activity;protein heterodimerization activity;receptor …	cell fraction;cell part;chylomicron;chylomicron remnant;clathrin coated vesicle membrane;clathrin-coated endocytic vesicle membrane;coated vesicle membrane;cytoplasmic part;cytoplasmic vesicle membrane;cytoplasmic vesicle part;endocytic vesicle membrane;endoplasmic reticulum lumen;endoplasmic reticulum membrane;endoplasmic reticulum part;endosomal part;endosome lumen;endosome membrane;extracellul…	6	4	4	0	2	0	0	2	0	1	2	0	1.4	515.6	P04114;F5H109	P04114;F5H109	Apolipoprotein B-100;Apolipoprotein B-48	NaN	20.9539	NaN	NaN	21.7092	NaN	NaN	21.4788	NaN
APOBR	5		Alternativesplicing;Atherosclerosis;Cellmembrane;Cholesterolmetabolism;Chylomicron;Completeproteome;Directproteinsequencing;LDL;Lipidmetabolism;Lipidtransport;Membrane;Phosphoprotein;Polymorphism;Receptor;Referenceproteome;Steroidmetabolism;Transport;VLDL	alcohol metabolic process;cholesterol metabolic process;establishment of localization;lipid metabolic process;lipid transport;metabolic process;organic substance transport;primary metabolic process;small molecule metabolic process;steroid metabolic process;sterol metabolic process;transport		cell part;chylomicron;extracellular region part;low-density lipoprotein particle;macromolecular complex;membrane;plasma lipoprotein particle;plasma membrane;protein-lipid complex;triglyceride-rich lipoprotein particle;very-low-density lipoprotein particle	14	14	14	5	6	10	3	6	9	7	9	8	20.1	115.63	H3BU97;Q0VD83;C9J815;Q0VD83-3;Q0VD83-2	H3BU97;Q0VD83;C9J815;Q0VD83-3;Q0VD83-2	Apolipoprotein B receptor	23.0976	23.4074	24.4243	22.3222	22.7871	23.155	22.5854	22.7398	24.1536
APOC3	1	PPAR signaling pathway	3D-structure;Chylomicron;Completeproteome;Directproteinsequencing;Diseasemutation;Glycoprotein;Lipiddegradation;Lipidtransport;Polymorphism;Referenceproteome;Secreted;Signal;Transport;VLDL	acylglycerol catabolic process;acylglycerol metabolic process;biological regulation;catabolic process;Cdc42 protein signal transduction;cell surface receptor linked signaling pathway;cellular catabolic process;cellular component assembly;cellular component organization;cellular component organization or biogenesis;cellular lipid catabolic process;cellular lipid metabolic process;cellular macromol…	binding;cholesterol binding;enzyme inhibitor activity;enzyme regulator activity;high-density lipoprotein particle receptor binding;lipase inhibitor activity;lipid binding;lipoprotein particle receptor binding;phospholipid binding;protein binding;receptor binding;steroid binding;sterol binding	chylomicron;extracellular region part;high-density lipoprotein particle;intermediate-density lipoprotein particle;macromolecular complex;plasma lipoprotein particle;protein-lipid complex;spherical high-density lipoprotein particle;triglyceride-rich lipoprotein particle;very-low-density lipoprotein particle	3	3	3	2	1	1	3	1	1	2	1	1	30.3	10.852	P02656	P02656	Apolipoprotein C-III	25.4394	NaN	NaN	26.408	NaN	NaN	25.5272	NaN	NaN
APOD	4		3D-structure;Completeproteome;Directproteinsequencing;Disulfidebond;Glycoprotein;Lipid-binding;Polymorphism;Pyrrolidonecarboxylicacid;Referenceproteome;Secreted;Signal;Transport	aging;alcohol metabolic process;anatomical structure development;anatomical structure formation involved in morphogenesis;anatomical structure morphogenesis;angiogenesis;axon regeneration;axonogenesis;biological regulation;brain development;carbohydrate metabolic process;cell part morphogenesis;cell projection morphogenesis;cell projection organization;cellular carbohydrate metabolic process;cell…	binding;cholesterol binding;lipid binding;lipid transporter activity;protein binding;steroid binding;sterol binding;substrate-specific transporter activity;transporter activity	cell body;cell part;cell projection;cytoplasmic part;cytosolic part;cytosolic ribosome;dendrite;endoplasmic reticulum;extracellular region;extracellular region part;extracellular space;intracellular membrane-bounded organelle;intracellular non-membrane-bounded organelle;intracellular organelle;intracellular part;macromolecular complex;membrane-bounded organelle;neuron projection;neuronal cell bod…	3	3	3	2	1	0	3	2	1	2	2	2	17.7	24.158	C9JF17;P05090;C9JX71;F8WBT9	C9JF17;P05090	Apolipoprotein D	20.0576	NaN	NaN	24.2005	19.4443	NaN	23.3091	19.9131	18.3072
APOE	4	Alzheimer's disease	3D-structure;Alzheimerdisease;Amyloidosis;Chylomicron;Completeproteome;Directproteinsequencing;Diseasemutation;Glycation;Glycoprotein;HDL;Heparin-binding;Hyperlipidemia;Lipidtransport;Neurodegeneration;Phosphoprotein;Polymorphism;Referenceproteome;Repeat;Secreted;Signal;Transport;VLDL	acylglycerol metabolic process;anti-apoptosis;biological regulation;Cdc42 protein signal transduction;cell communication;cell death;cell surface receptor linked signaling pathway;cell-cell signaling;cellular component assembly;cellular component organization;cellular component organization at cellular level;cellular component organization or biogenesis;cellular component organization or biogenesi…	antioxidant activity;beta-amyloid binding;binding;carbohydrate binding;cation binding;cytoskeletal protein binding;enzyme activator activity;enzyme regulator activity;glycosaminoglycan binding;heparin binding;identical protein binding;ion binding;lipid binding;lipoprotein particle receptor binding;low-density lipoprotein particle receptor binding;metal chelating activity;metal ion binding;pattern…	cell body;cell part;cell projection;chylomicron;dendrite;extracellular region part;high-density lipoprotein particle;intermediate-density lipoprotein particle;low-density lipoprotein particle;macromolecular complex;neuron projection;neuronal cell body;plasma lipoprotein particle;protein-lipid complex;triglyceride-rich lipoprotein particle;very-low-density lipoprotein particle	6	6	5	4	0	0	1	0	0	3	1	1	25.2	36.154	P02649;H0Y7L5;E7ERP7;E9PEV4	P02649;H0Y7L5;E7ERP7;E9PEV4	Apolipoprotein E	21.9557	NaN	NaN	NaN	NaN	NaN	21.8763	NaN	NaN
APPL1	3	Colorectal cancer;Pathways in cancer	3D-structure;Cellcycle;Coiledcoil;Completeproteome;Endosome;Membrane;Nucleus;Phosphoprotein;Polymorphism;Referenceproteome	apoptosis;biological regulation;cell cycle;cell death;cell proliferation;cell surface receptor linked signaling pathway;cellular process;cellular response to chemical stimulus;cellular response to endogenous stimulus;cellular response to hormone stimulus;cellular response to insulin stimulus;cellular response to organic substance;cellular response to peptide hormone stimulus;cellular response to …	binding;enzyme binding;kinase binding;protein binding;protein kinase B binding;protein kinase binding	cell fraction;cell part;cytoplasmic part;cytosol;early endosome membrane;endosomal part;endosome membrane;insoluble fraction;intracellular membrane-bounded organelle;intracellular organelle;intracellular organelle part;intracellular part;membrane;membrane fraction;membrane-bounded organelle;microsome;nucleus;organelle;organelle membrane;organelle part;vesicle membrane;vesicular fraction	13	13	13	4	6	7	7	5	6	6	4	5	28.6	79.663	Q9UKG1;C9K0C4;C9JAB0	Q9UKG1	DCC-interacting protein 13-alpha	21.3465	21.1636	21.5633	22.1099	21.1413	21.876	21.2831	20.539	21.1618
APRT	6	Purine metabolism	3D-structure;Acetylation;Completeproteome;Cytoplasm;Directproteinsequencing;Diseasemutation;Glycosyltransferase;Phosphoprotein;Polymorphism;Purinesalvage;Referenceproteome;Transferase	biosynthetic process;cellular biosynthetic process;cellular metabolic compound salvage;cellular metabolic process;cellular nitrogen compound biosynthetic process;cellular nitrogen compound metabolic process;cellular process;heterocycle biosynthetic process;heterocycle metabolic process;metabolic process;nitrogen compound metabolic process;nucleobase-containing compound biosynthetic process;nucleo…	adenine phosphoribosyltransferase activity;adenyl nucleotide binding;adenyl ribonucleotide binding;AMP binding;binding;catalytic activity;nucleotide binding;purine nucleotide binding;purine ribonucleotide binding;ribonucleotide binding;transferase activity;transferase activity, transferring glycosyl groups;transferase activity, transferring pentosyl groups	cell part;cytoplasmic part;cytosol;intracellular membrane-bounded organelle;intracellular organelle;intracellular part;membrane-bounded organelle;nucleus;organelle	7	7	7	5	6	6	6	4	5	5	4	5	37.8	19.608	P07741;H3BQB1;H3BQZ9;H3BQF1;G5E9J2;H3BSW3	P07741;H3BQB1;H3BQZ9;H3BQF1;G5E9J2;H3BSW3	Adenine phosphoribosyltransferase	25.2912	24.6169	23.8402	25.5546	24.7301	24.5394	25.0767	24.7691	24.8847
AQR	1	Spliceosome	Acetylation;Completeproteome;mRNAprocessing;mRNAsplicing;Nucleus;Referenceproteome;RNA-binding;Spliceosome	cellular macromolecule metabolic process;cellular metabolic process;cellular nitrogen compound metabolic process;cellular process;macromolecule metabolic process;metabolic process;mRNA metabolic process;mRNA processing;nitrogen compound metabolic process;nuclear mRNA splicing, via spliceosome;nucleic acid metabolic process;nucleobase-containing compound metabolic process;primary metabolic process…		catalytic step 2 spliceosome;cell part;intracellular organelle part;intracellular part;macromolecular complex;nuclear part;organelle part;ribonucleoprotein complex;spliceosomal complex	3	3	3	0	2	2	0	1	1	0	0	1	3.2	171.29	O60306	O60306	Intron-binding protein aquarius	NaN	19.0146	19.5631	NaN	NaN	NaN	NaN	NaN	NaN
ARAP1	11	Endocytosis	Alternativesplicing;Cellmembrane;Completeproteome;Cytoplasm;Golgiapparatus;GTPaseactivation;Membrane;Metal-binding;Phosphoprotein;Polymorphism;Referenceproteome;Repeat;Zinc;Zinc-finger	actin cytoskeleton organization;actin cytoskeleton reorganization;actin filament organization;actin filament reorganization involved in cell cycle;actin filament-based process;biological regulation;cell cycle process;cellular component organization;cellular component organization at cellular level;cellular component organization or biogenesis;cellular component organization or biogenesis at cellu…	ARF GTPase activator activity;binding;cation binding;enzyme activator activity;enzyme regulator activity;GTPase activator activity;GTPase regulator activity;ion binding;lipid binding;metal ion binding;nucleoside-triphosphatase regulator activity;phosphatidylinositol binding;phosphatidylinositol-3,4,5-trisphosphate binding;phospholipid binding;protein binding;Ras GTPase activator activity;Rho GTPa…	cell part;cytoplasmic part;cytosol;Golgi apparatus part;Golgi cisterna membrane;Golgi membrane;intracellular;intracellular organelle part;intracellular part;membrane;organelle membrane;organelle part;plasma membrane	5	5	5	2	4	3	2	2	3	3	2	2	3.6	162.19	Q96P48;Q96P48-3;Q96P48-1;Q96P48-4;Q96P48-2;E7EU13;Q96P48-7;Q96P48-5;H3BLV2;F8WBT0;F5GWN4	Q96P48;Q96P48-3;Q96P48-1;Q96P48-4;Q96P48-2;E7EU13;Q96P48-7;Q96P48-5	Arf-GAP with Rho-GAP domain, ANK repeat and PH domain-containing protein 1	NaN	20.3177	20.1245	NaN	NaN	20.358	20.4135	19.3617	20.747
ARCN1	5		Acetylation;Completeproteome;Cytoplasm;Cytoplasmicvesicle;ER-Golgitransport;Golgiapparatus;Membrane;Polymorphism;Proteintransport;Referenceproteome;Transport	cellular component organization;cellular component organization at cellular level;cellular component organization or biogenesis;cellular component organization or biogenesis at cellular level;cellular process;COPI coating of Golgi vesicle;establishment of localization;establishment of localization in cell;establishment of protein localization;Golgi transport vesicle coating;Golgi vesicle transpor…		AP-type membrane coat adaptor complex;cell part;clathrin adaptor complex;COPI vesicle coat;cytoplasmic part;cytoplasmic vesicle part;cytosol;Golgi apparatus part;intracellular organelle part;intracellular part;macromolecular complex;membrane coat;membrane part;organelle part;protein complex;vesicle coat	11	11	11	6	11	7	9	8	7	6	7	9	18.8	61.626	B0YIW6;P48444;E9PEU4;Q6P1Q5;E9PK34	B0YIW6;P48444;E9PEU4;Q6P1Q5	Coatomer subunit delta	23.1607	23.4917	23.2905	23.1588	23.346	23.426	23.3489	23.2648	23.5276
ARF1;ARF3	11	Vibrio cholerae infection	3D-structure;Completeproteome;Cytoplasm;Directproteinsequencing;ER-Golgitransport;Golgiapparatus;GTP-binding;Lipoprotein;Myristate;Nucleotide-binding;Phosphoprotein;Proteintransport;Referenceproteome;Transport	biological regulation;cation homeostasis;cellular cation homeostasis;cellular chemical homeostasis;cellular component organization;cellular component organization at cellular level;cellular component organization or biogenesis;cellular component organization or biogenesis at cellular level;cellular copper ion homeostasis;cellular homeostasis;cellular ion homeostasis;cellular process;cellular resp…	binding;catalytic activity;GTP binding;GTPase activity;guanyl nucleotide binding;guanyl ribonucleotide binding;hydrolase activity;hydrolase activity, acting on acid anhydrides;hydrolase activity, acting on acid anhydrides, in phosphorus-containing anhydrides;molecular transducer activity;nucleoside-triphosphatase activity;nucleotide binding;protein binding;purine nucleotide binding;purine ribonuc…	cell part;cytoplasmic part;cytosol;Golgi apparatus;Golgi apparatus part;Golgi membrane;intracellular;intracellular membrane-bounded organelle;intracellular organelle;intracellular organelle part;intracellular part;membrane;membrane-bounded organelle;organelle;organelle membrane;organelle part;perinuclear region of cytoplasm;plasma membrane	9	9	6	3	6	8	4	5	6	4	4	4	52.5	20.697	P84077;P61204;F5H3A6;F5H423;B7ZB63;F5H0C7;H0YGG7;F8WDB3;F8WCJ5;F5H6T5;F5H1V1	P84077;P61204;F5H3A6;F5H423;B7ZB63	ADP-ribosylation factor 1;ADP-ribosylation factor 3	23.6426	24.5387	24.3657	24.8683	24.9064	24.8977	25.0264	24.202	25.2217
ARF4	3		3D-structure;Acetylation;Completeproteome;ER-Golgitransport;Golgiapparatus;GTP-binding;Lipoprotein;Myristate;Nucleotide-binding;Polymorphism;Proteintransport;Referenceproteome;Transport	biological regulation;cellular process;cellular response to stimulus;establishment of localization;establishment of protein localization;intracellular signal transduction;protein transport;regulation of biological process;regulation of cellular process;response to stimulus;signal transduction;small GTPase mediated signal transduction;transport;vesicle-mediated transport	binding;catalytic activity;GTP binding;GTPase activity;guanyl nucleotide binding;guanyl ribonucleotide binding;hydrolase activity;hydrolase activity, acting on acid anhydrides;hydrolase activity, acting on acid anhydrides, in phosphorus-containing anhydrides;nucleoside-triphosphatase activity;nucleotide binding;protein binding;purine nucleotide binding;purine ribonucleoside triphosphate binding;p…	cell part;cytoplasmic part;Golgi apparatus;intracellular;intracellular membrane-bounded organelle;intracellular organelle;intracellular part;membrane-bounded organelle;organelle	6	4	4	2	6	5	4	5	5	4	4	5	41.1	20.511	P18085;C9JAK5;C9JPM4	P18085;C9JAK5;C9JPM4	ADP-ribosylation factor 4	NaN	23.4666	22.9161	22.1326	21.9427	21.7587	22.5103	22.4554	21.9826
ARF5	2		3D-structure;Completeproteome;Cytoplasm;ER-Golgitransport;Golgiapparatus;GTP-binding;Lipoprotein;Myristate;Nucleotide-binding;Proteintransport;Referenceproteome;Transport	biological regulation;cellular process;cellular response to stimulus;establishment of localization;establishment of protein localization;intracellular signal transduction;protein transport;regulation of biological process;regulation of cellular process;response to stimulus;signal transduction;small GTPase mediated signal transduction;transport;vesicle-mediated transport	binding;catalytic activity;GTP binding;GTPase activity;guanyl nucleotide binding;guanyl ribonucleotide binding;hydrolase activity;hydrolase activity, acting on acid anhydrides;hydrolase activity, acting on acid anhydrides, in phosphorus-containing anhydrides;nucleoside-triphosphatase activity;nucleotide binding;protein binding;purine nucleotide binding;purine ribonucleoside triphosphate binding;p…	cell part;cytoplasmic part;Golgi apparatus;intracellular;intracellular membrane-bounded organelle;intracellular organelle;intracellular part;membrane-bounded organelle;organelle;perinuclear region of cytoplasm	5	2	2	3	5	5	3	4	5	4	4	4	35.6	20.529	P84085;C9J1Z8	P84085;C9J1Z8	ADP-ribosylation factor 5	NaN	20.8916	NaN	NaN	NaN	18.0537	NaN	NaN	NaN
ARFGAP2	15	Endocytosis	3D-structure;Coiledcoil;Completeproteome;Cytoplasm;ER-Golgitransport;Golgiapparatus;GTPaseactivation;Membrane;Metal-binding;Phosphoprotein;Polymorphism;Proteintransport;Referenceproteome;Transport;Zinc;Zinc-finger	biological regulation;cellular process;establishment of localization;establishment of protein localization;protein transport;regulation of ARF GTPase activity;regulation of biological process;regulation of catabolic process;regulation of catalytic activity;regulation of cellular catabolic process;regulation of cellular metabolic process;regulation of cellular process;regulation of GTP catabolic p…	ARF GTPase activator activity;binding;cation binding;enzyme activator activity;enzyme regulator activity;GTPase activator activity;GTPase regulator activity;ion binding;metal ion binding;nucleoside-triphosphatase regulator activity;small GTPase regulator activity;transition metal ion binding;zinc ion binding	cell part;cytoplasmic part;Golgi apparatus;Golgi apparatus part;Golgi membrane;intracellular membrane-bounded organelle;intracellular non-membrane-bounded organelle;intracellular organelle;intracellular organelle part;intracellular part;membrane;membrane-bounded organelle;non-membrane-bounded organelle;nuclear part;nucleolus;organelle;organelle membrane;organelle part;plasma membrane	6	6	6	4	5	5	3	2	3	3	2	3	16.1	56.72	Q8N6H7;G5E9L0;E9PQP3;B4DX29;B4E327;E9PIY6;H0YDN9;E9PN48;E9PK28;E9PJT7;E9PMU9;E9PNY8;E9PM63;E9PMR9;E9PM18	Q8N6H7;G5E9L0;E9PQP3;B4DX29;B4E327;E9PIY6;H0YDN9	ADP-ribosylation factor GTPase-activating protein 2	21.6543	21.6139	21.391	21.0678	21.8261	19.8777	20.5553	21.0479	21.1577
ARFGAP3	6	Endocytosis	3D-structure;Acetylation;Coiledcoil;Completeproteome;Cytoplasm;ER-Golgitransport;Golgiapparatus;GTPaseactivation;Membrane;Metal-binding;Phosphoprotein;Polymorphism;Proteintransport;Referenceproteome;Transport;Zinc;Zinc-finger	biological regulation;cellular process;establishment of localization;establishment of localization in cell;establishment of protein localization;intracellular protein transport;intracellular transport;protein secretion;protein transport;regulation of ARF GTPase activity;regulation of biological process;regulation of catabolic process;regulation of catalytic activity;regulation of cellular catabol…	ARF GTPase activator activity;binding;cation binding;enzyme activator activity;enzyme regulator activity;GTPase activator activity;GTPase regulator activity;ion binding;metal ion binding;nucleoside-triphosphatase regulator activity;protein transporter activity;small GTPase regulator activity;substrate-specific transporter activity;transition metal ion binding;transporter activity;zinc ion binding	cell part;cytoplasmic part;cytosol;Golgi apparatus part;Golgi membrane;intracellular organelle part;intracellular part;membrane;organelle membrane;organelle part	3	3	3	1	3	3	1	2	2	2	2	3	5.8	56.928	Q9NP61;E9PB03;C9JZR4;F5GYF6;B0QYV8;H0Y6A0	Q9NP61;E9PB03;C9JZR4;F5GYF6;B0QYV8	ADP-ribosylation factor GTPase-activating protein 3	NaN	20.4974	19.5233	NaN	NaN	20.0606	NaN	20.8272	19.648
ARFGEF1	3		3D-structure;Acetylation;Completeproteome;Guanine-nucleotidereleasingfactor;Phosphoprotein;Polymorphism;Referenceproteome	biological regulation;cellular process;establishment of localization;establishment of localization in cell;exocytosis;regulation of ARF protein signal transduction;regulation of biological process;regulation of cellular process;regulation of Ras protein signal transduction;regulation of response to stimulus;regulation of signal transduction;regulation of signaling;regulation of small GTPase media…	ARF guanyl-nucleotide exchange factor activity;binding;cytoskeletal protein binding;enzyme regulator activity;GTPase regulator activity;guanyl-nucleotide exchange factor activity;myosin binding;nucleoside-triphosphatase regulator activity;protein binding;small GTPase regulator activity	cell part;cytoplasmic part;Golgi apparatus;intracellular;intracellular membrane-bounded organelle;intracellular organelle;intracellular part;membrane-bounded organelle;nucleus;organelle	6	6	3	3	4	6	1	2	3	3	2	2	4.2	208.76	Q9Y6D6;E5RIF2;E5RHL7	Q9Y6D6;E5RIF2	Brefeldin A-inhibited guanine nucleotide-exchange protein 1	20.9158	20.7314	21.0797	NaN	20.685	20.0994	20.3064	20.6199	NaN
ARFIP1	3		Alternativesplicing;Completeproteome;Phosphoprotein;Referenceproteome	biological regulation;establishment of localization;establishment of localization in cell;establishment of protein localization;intracellular protein transport;intracellular transport;protein transport;regulation of biological process;regulation of cellular localization;regulation of cellular process;regulation of establishment of protein localization;regulation of localization;regulation of prot…	binding;protein binding;protein domain specific binding	cell part;cytoplasmic part;cytosol;Golgi apparatus part;Golgi membrane;intracellular organelle part;intracellular part;membrane;organelle membrane;organelle part	4	4	4	2	3	3	1	2	2	2	2	4	12.9	41.738	P53367;P53367-2;B4DS69	P53367;P53367-2;B4DS69	Arfaptin-1	19.9875	20.7145	20.4403	NaN	20.359	19.6527	NaN	20.7837	21.1153
ARG1	3	Amoebiasis;Arginine and proline metabolism	3D-structure;Alternativesplicing;Argininemetabolism;Completeproteome;Cytoplasm;Diseasemutation;Hydrolase;Manganese;Metal-binding;Phosphoprotein;Polymorphism;Referenceproteome;Ureacycle	amide biosynthetic process;amine catabolic process;amine metabolic process;arginine catabolic process;arginine metabolic process;biosynthetic process;carboxylic acid catabolic process;carboxylic acid metabolic process;catabolic process;cellular amide metabolic process;cellular amine metabolic process;cellular amino acid catabolic process;cellular amino acid metabolic process;cellular biosynthetic…	arginase activity;catalytic activity;hydrolase activity;hydrolase activity, acting on carbon-nitrogen (but not peptide) bonds;hydrolase activity, acting on carbon-nitrogen (but not peptide) bonds, in linear amidines	cell part;cytoplasmic part;cytosol;intracellular part	8	8	8	3	1	1	4	4	1	4	1	1	30.3	35.664	P05089-2;P05089;P05089-3	P05089-2;P05089;P05089-3	Arginase-1	22.3806	NaN	NaN	21.7977	20.337	NaN	22.4383	NaN	NaN
ARHGAP1	3		Completeproteome;Referenceproteome	biological regulation;cellular process;cellular response to stimulus;regulation of biological process;regulation of cellular process;response to stimulus;signal transduction		cell part;intracellular membrane-bounded organelle;intracellular organelle;intracellular part;membrane-bounded organelle;organelle	10	1	1	4	7	4	6	4	7	5	4	5	28.8	52.73	E9PCG8;H0YE29;E9PNR6	E9PCG8;H0YE29		NaN	NaN	21.886	NaN	NaN	NaN	NaN	NaN	NaN
ARHGAP1	1		3D-structure;Acetylation;Completeproteome;Cytoplasm;Directproteinsequencing;GTPaseactivation;Phosphoprotein;Polymorphism;Referenceproteome;SH3-binding	biological regulation;cellular process;cellular response to stimulus;intracellular signal transduction;Ras protein signal transduction;regulation of biological process;regulation of cellular process;response to stimulus;Rho protein signal transduction;signal transduction;small GTPase mediated signal transduction	binding;binding, bridging;protein binding;protein binding, bridging;protein domain specific binding;SH3 domain binding;SH3/SH2 adaptor activity;signaling adaptor activity	cell part;cytoplasmic part;cytosol;intracellular membrane-bounded organelle;intracellular organelle;intracellular part;membrane-bounded organelle;organelle	11	11	2	5	9	5	7	6	8	6	5	7	32.8	50.435	Q07960	Q07960	Rho GTPase-activating protein 1	23.3971	23.5701	23.9908	22.9286	22.9931	24.2909	24.5519	23.8139	24.6382
ARHGAP15	3		3D-structure;Acetylation;Completeproteome;Cytoplasm;GTPaseactivation;Membrane;Phosphoprotein;Referenceproteome	biological regulation;cellular process;cellular response to stimulus;intracellular signal transduction;regulation of anatomical structure morphogenesis;regulation of biological process;regulation of biological quality;regulation of cell morphogenesis;regulation of cell shape;regulation of cellular component organization;regulation of cellular process;regulation of developmental process;response t…	enzyme activator activity;enzyme regulator activity;GTPase activator activity;GTPase regulator activity;nucleoside-triphosphatase regulator activity;Rac GTPase activator activity;Ras GTPase activator activity;Rho GTPase activator activity;small GTPase regulator activity	cell part;cytoplasmic part;cytosol;intracellular part;membrane	2	2	2	0	2	1	0	0	0	0	0	0	5.3	54.544	Q53QZ3;B8ZZK0;H7BZM0	Q53QZ3;B8ZZK0;H7BZM0	Rho GTPase-activating protein 15	NaN	18.6873	NaN	NaN	NaN	NaN	NaN	NaN	NaN
ARHGAP17	9		Acetylation;Alternativesplicing;Celljunction;Completeproteome;Cytoplasm;GTPaseactivation;Membrane;Phosphoprotein;Referenceproteome;SH3-binding;Tightjunction	biological regulation;cellular process;cellular response to stimulus;intracellular signal transduction;regulation of biological process;regulation of cellular process;regulation of response to stimulus;regulation of signal transduction;regulation of signaling;regulation of small GTPase mediated signal transduction;response to stimulus;signal transduction;small GTPase mediated signal transduction	binding;enzyme activator activity;enzyme regulator activity;GTPase activator activity;GTPase regulator activity;nucleoside-triphosphatase regulator activity;protein binding;protein domain specific binding;SH3 domain binding	cell junction;cell part;cell-cell junction;cytoplasm;cytoplasmic part;cytosol;intracellular part;occluding junction;tight junction	7	7	7	3	4	4	2	3	3	2	2	1	12.1	95.436	Q68EM7;Q68EM7-2;Q68EM7-5;C9IZD3;Q68EM7-6;C9JE65;Q68EM7-4;Q68EM7-3;Q68EM7-7	Q68EM7;Q68EM7-2;Q68EM7-5;C9IZD3;Q68EM7-6;C9JE65;Q68EM7-4	Rho GTPase-activating protein 17	21.6119	20.7595	21.1747	21.3497	20.5201	21.0241	NaN	20.6123	NaN
ARHGAP18	2		Alternativesplicing;Completeproteome;GTPaseactivation;Polymorphism;Referenceproteome	biological regulation;cellular process;cellular response to stimulus;intracellular signal transduction;regulation of biological process;regulation of cellular process;regulation of response to stimulus;regulation of signal transduction;regulation of signaling;regulation of small GTPase mediated signal transduction;response to stimulus;signal transduction;small GTPase mediated signal transduction	enzyme activator activity;enzyme regulator activity;GTPase activator activity;GTPase regulator activity;nucleoside-triphosphatase regulator activity	cell part;cytoplasmic part;cytosol;intracellular part	5	5	5	1	2	3	1	1	1	4	1	1	9	74.976	Q8N392;Q8N392-2	Q8N392;Q8N392-2	Rho GTPase-activating protein 18	NaN	NaN	19.8673	NaN	NaN	NaN	20.2722	NaN	NaN
ARHGAP26	4		3D-structure;Alternativesplicing;Celljunction;Chromosomalrearrangement;Completeproteome;Cytoplasm;Cytoskeleton;Diseasemutation;GTPaseactivation;Phosphoprotein;Proto-oncogene;Referenceproteome;SH3domain	actin cytoskeleton organization;actin filament-based process;anatomical structure development;biological regulation;cell projection assembly;cell projection organization;cellular component assembly;cellular component assembly at cellular level;cellular component organization;cellular component organization at cellular level;cellular component organization or biogenesis;cellular component organiza…	binding;binding, bridging;cytoskeletal adaptor activity;cytoskeletal protein binding;enzyme activator activity;enzyme regulator activity;GTPase activator activity;GTPase regulator activity;nucleoside-triphosphatase regulator activity;protein binding;protein binding, bridging;protein domain specific binding;Ras GTPase activator activity;Rho GTPase activator activity;SH3 domain binding;small GTPase…	adherens junction;anchoring junction;cell junction;cell part;cell-substrate adherens junction;cell-substrate junction;cytoplasmic part;cytoskeleton;cytosol;focal adhesion;intracellular non-membrane-bounded organelle;intracellular organelle;intracellular part;non-membrane-bounded organelle;organelle	2	2	2	0	0	2	0	0	1	0	0	1	2.9	92.234	Q9UNA1;Q9UNA1-2;H0Y4P9;F8W8N5	Q9UNA1;Q9UNA1-2;H0Y4P9;F8W8N5	Rho GTPase-activating protein 26	NaN	NaN	19.2796	NaN	NaN	NaN	NaN	NaN	NaN
ARHGAP30	4		Alternativesplicing;Completeproteome;Cytoplasmicvesicle;GTPaseactivation;Phosphoprotein;Polymorphism;Referenceproteome	biological regulation;cellular process;cellular response to stimulus;intracellular signal transduction;regulation of biological process;regulation of cellular process;regulation of response to stimulus;regulation of signal transduction;regulation of signaling;regulation of small GTPase mediated signal transduction;response to stimulus;signal transduction;small GTPase mediated signal transduction	enzyme activator activity;enzyme regulator activity;GTPase activator activity;GTPase regulator activity;nucleoside-triphosphatase regulator activity	cell part;cytoplasmic membrane-bounded vesicle;cytoplasmic part;cytoplasmic vesicle;cytosol;intracellular membrane-bounded organelle;intracellular organelle;intracellular part;membrane-bounded organelle;membrane-bounded vesicle;organelle;vesicle	3	3	3	2	1	3	1	1	1	1	1	0	3.4	118.58	Q7Z6I6;Q7Z6I6-3;Q7Z6I6-2;Q7Z6I6-4	Q7Z6I6;Q7Z6I6-3;Q7Z6I6-2	Rho GTPase-activating protein 30	20.3298	NaN	20.102	NaN	NaN	NaN	NaN	NaN	NaN
ARHGAP4	12		3D-structure;Coiledcoil;Completeproteome;Cytoplasm;GTPaseactivation;Phosphoprotein;Polymorphism;Referenceproteome;SH3domain	apoptosis;biological regulation;cell death;cell surface receptor linked signaling pathway;cellular component organization;cellular component organization at cellular level;cellular component organization or biogenesis;cellular component organization or biogenesis at cellular level;cellular process;cellular response to stimulus;cytoskeleton organization;death;enzyme linked receptor protein signali…	binding;binding, bridging;enzyme activator activity;enzyme regulator activity;GTPase activator activity;GTPase regulator activity;nucleoside-triphosphatase regulator activity;protein binding;protein binding, bridging;Ras GTPase activator activity;Rho GTPase activator activity;SH3/SH2 adaptor activity;signaling adaptor activity;small GTPase regulator activity	adherens junction;anchoring junction;cell junction;cell part;cell-substrate adherens junction;cell-substrate junction;cytoplasm;cytoplasmic part;cytosol;focal adhesion;intracellular membrane-bounded organelle;intracellular organelle;intracellular part;membrane-bounded organelle;nucleus;organelle	13	13	13	8	8	10	7	5	5	7	6	6	15.4	109.39	P98171-2;P98171;E7EQN5;F5GZW3;E9PCM6;F8WAR0;H7C2Z8;C9J5M2;C9JLA8;H7C3K8;H7C3G3;H7C120	P98171-2;P98171;E7EQN5;F5GZW3;E9PCM6	Rho GTPase-activating protein 4	23.0578	21.9578	22.4722	22.6127	22.018	22.331	22.8245	21.7294	22.4927
ARHGAP9	11		3D-structure;Alternativesplicing;Completeproteome;GTPaseactivation;Phosphoprotein;Polymorphism;Referenceproteome;SH3domain	biological regulation;cellular process;cellular response to stimulus;intracellular signal transduction;regulation of biological process;regulation of cellular process;regulation of response to stimulus;regulation of signal transduction;regulation of signaling;regulation of small GTPase mediated signal transduction;response to stimulus;signal transduction;small GTPase mediated signal transduction	enzyme activator activity;enzyme regulator activity;GTPase activator activity;GTPase regulator activity;nucleoside-triphosphatase regulator activity	cell part;cytoplasmic part;cytosol;intracellular;intracellular part	6	6	6	3	2	4	1	3	5	3	2	4	10.5	85.67	H7BXZ0;Q9BRR9-2;E9PDX9;Q9BRR9-4;Q9BRR9;Q9BRR9-3;F8VW89;E9PD79;F8W1N6;H0YI36;F8VR90	H7BXZ0;Q9BRR9-2;E9PDX9;Q9BRR9-4;Q9BRR9;Q9BRR9-3;F8VW89	Rho GTPase-activating protein 9	21.0619	NaN	20.9444	NaN	20.2911	21.2928	20.1259	20.4955	21.1203
ARHGDIA	2	Neurotrophin signaling pathway;Vasopressin-regulated water reabsorption	3D-structure;Acetylation;Completeproteome;Cytoplasm;Directproteinsequencing;GTPaseactivation;Referenceproteome	anti-apoptosis;biological regulation;cell surface receptor linked signaling pathway;cellular component movement;cellular process;cellular response to stimulus;enzyme linked receptor protein signaling pathway;intracellular signal transduction;negative regulation of apoptosis;negative regulation of axonogenesis;negative regulation of biological process;negative regulation of cell adhesion;negative …	enzyme activator activity;enzyme regulator activity;GDP-dissociation inhibitor activity;GTPase activator activity;GTPase regulator activity;nucleoside-triphosphatase regulator activity;Rho GDP-dissociation inhibitor activity;small GTPase regulator activity	cell part;cytoplasm;cytoplasmic part;cytoskeleton;cytosol;intracellular non-membrane-bounded organelle;intracellular organelle;intracellular part;non-membrane-bounded organelle;organelle	7	7	7	5	6	6	6	6	6	5	5	6	42.2	23.207	P52565;A8MXW0	P52565;A8MXW0	Rho GDP-dissociation inhibitor 1	26.2993	25.9984	26.2148	26.0155	26.2406	26.0951	25.9711	25.8374	25.8127
ARHGDIB	5	Neurotrophin signaling pathway;Vasopressin-regulated water reabsorption	3D-structure;Acetylation;Completeproteome;Cytoplasm;Directproteinsequencing;GTPaseactivation;Phosphoprotein;Referenceproteome	actin cytoskeleton organization;actin filament-based process;biological regulation;cellular component movement;cellular component organization;cellular component organization at cellular level;cellular component organization or biogenesis;cellular component organization or biogenesis at cellular level;cellular process;cellular response to stimulus;cytoskeleton organization;developmental process;i…	enzyme activator activity;enzyme regulator activity;GDP-dissociation inhibitor activity;GTPase activator activity;GTPase regulator activity;nucleoside-triphosphatase regulator activity;Rho GDP-dissociation inhibitor activity;small GTPase regulator activity	cell part;cytoplasm;cytoplasmic membrane-bounded vesicle;cytoplasmic part;cytoplasmic vesicle;cytoskeleton;cytosol;intracellular membrane-bounded organelle;intracellular non-membrane-bounded organelle;intracellular organelle;intracellular part;membrane-bounded organelle;membrane-bounded vesicle;non-membrane-bounded organelle;organelle;vesicle	9	9	9	6	8	9	7	5	7	6	6	6	46.3	22.988	P52566;F5H3P3;H0YGX7;F5H6Q0;F5H2R5	P52566;F5H3P3;H0YGX7;F5H6Q0;F5H2R5	Rho GDP-dissociation inhibitor 2	27.7358	25.8293	26.3508	27.9316	26.6287	26.3591	27.3908	25.9159	26.6034
ARHGEF1	5	ko05152;Regulation of actin cytoskeleton;Vascular smooth muscle contraction	3D-structure;Alternativesplicing;Coiledcoil;Completeproteome;Cytoplasm;GTPaseactivation;Guanine-nucleotidereleasingfactor;Membrane;Phosphoprotein;Polymorphism;Referenceproteome	biological regulation;cell proliferation;cell surface receptor linked signaling pathway;cellular process;cellular response to stimulus;enzyme linked receptor protein signaling pathway;intracellular signal transduction;negative regulation of axonogenesis;negative regulation of biological process;negative regulation of cell communication;negative regulation of cell development;negative regulation o…	binding;enzyme activator activity;enzyme regulator activity;GTPase activator activity;GTPase regulator activity;guanyl-nucleotide exchange factor activity;nucleoside-triphosphatase regulator activity;protein binding;Ras guanyl-nucleotide exchange factor activity;Rho guanyl-nucleotide exchange factor activity;small GTPase regulator activity	cell part;cytoplasm;cytoplasmic part;cytosol;intracellular part;membrane;plasma membrane	13	13	13	6	8	8	5	5	6	4	4	6	19.1	104.06	Q92888-3;Q92888;Q92888-2;Q6NX52;H0Y2T4	Q92888-3;Q92888;Q92888-2;Q6NX52	Rho guanine nucleotide exchange factor 1	22.2097	21.8766	22.4965	21.9643	21.2121	21.3549	21.9915	21.9982	22.6051
ARHGEF18	3		Alternativesplicing;Coiledcoil;Completeproteome;Cytoplasm;Guanine-nucleotidereleasingfactor;Phosphoprotein;Polymorphism;Referenceproteome	actin cytoskeleton organization;actin filament-based process;apoptosis;biological regulation;cell death;cell surface receptor linked signaling pathway;cellular component organization;cellular component organization at cellular level;cellular component organization or biogenesis;cellular component organization or biogenesis at cellular level;cellular process;cellular response to stimulus;cytoskele…	enzyme regulator activity;GTPase regulator activity;guanyl-nucleotide exchange factor activity;nucleoside-triphosphatase regulator activity;Ras guanyl-nucleotide exchange factor activity;Rho guanyl-nucleotide exchange factor activity;small GTPase regulator activity	cell part;cytoplasmic part;cytosol;intracellular part;membrane;plasma membrane	3	3	3	3	2	2	0	1	0	1	1	1	3.1	130.78	Q6ZSZ5;Q6ZSZ5-3;Q6ZSZ5-2	Q6ZSZ5;Q6ZSZ5-3;Q6ZSZ5-2	Rho guanine nucleotide exchange factor 18	20.0609	19.792	20.3824	NaN	NaN	NaN	NaN	NaN	NaN
ARHGEF2	6	Pathogenic Escherichia coli infection	Acetylation;Alternativesplicing;Cellcycle;Celldivision;Celljunction;Cellmembrane;Cellprojection;Coiledcoil;Completeproteome;Cytoplasm;Cytoskeleton;Golgiapparatus;Guanine-nucleotidereleasingfactor;Membrane;Metal-binding;Microtubule;Mitosis;Phosphoprotein;Referenceproteome;Tightjunction;Zinc;Zinc-finger	actin cytoskeleton organization;actin filament organization;actin filament-based process;anatomical structure morphogenesis;apoptosis;biological regulation;cell cycle phase;cell cycle process;cell death;cell division;cell morphogenesis;cell surface receptor linked signaling pathway;cellular component morphogenesis;cellular component organization;cellular component organization at cellular level;c…	binding;cation binding;cytoskeletal protein binding;enzyme binding;enzyme regulator activity;GTPase binding;GTPase regulator activity;guanyl-nucleotide exchange factor activity;ion binding;metal ion binding;microtubule binding;nucleoside-triphosphatase regulator activity;protein binding;Rac GTPase binding;Rac guanyl-nucleotide exchange factor activity;Ras GTPase binding;Ras guanyl-nucleotide exch…	cell junction;cell part;cell projection membrane;cell projection part;cell-cell junction;cytoplasmic part;cytoskeletal part;cytosol;Golgi apparatus;intracellular;intracellular membrane-bounded organelle;intracellular non-membrane-bounded organelle;intracellular organelle;intracellular organelle part;intracellular part;leading edge membrane;macromolecular complex;membrane part;membrane-bounded org…	15	15	15	9	9	11	7	9	9	7	9	9	17.4	111.49	Q5VY93;Q92974;Q92974-2;Q92974-3;B7Z977;F5H3H5	Q5VY93;Q92974;Q92974-2;Q92974-3;B7Z977;F5H3H5	Rho guanine nucleotide exchange factor 2	22.6817	23.3594	23.1272	22.2411	22.9387	23.1529	22.5203	22.8316	23.1878
ARHGEF6	4	Pancreatic cancer;Regulation of actin cytoskeleton	3D-structure;Acetylation;Alternativesplicing;Completeproteome;Guanine-nucleotidereleasingfactor;Mentalretardation;Phosphoprotein;Polymorphism;Referenceproteome;SH3domain	apoptosis;biological regulation;cell death;cell junction assembly;cell junction organization;cell surface receptor linked signaling pathway;cellular component assembly;cellular component assembly at cellular level;cellular component organization;cellular component organization at cellular level;cellular component organization or biogenesis;cellular component organization or biogenesis at cellular…	binding;enzyme activator activity;enzyme regulator activity;GTPase activator activity;GTPase regulator activity;guanyl-nucleotide exchange factor activity;nucleoside-triphosphatase regulator activity;protein binding;Ras guanyl-nucleotide exchange factor activity;Rho guanyl-nucleotide exchange factor activity;small GTPase regulator activity	cell part;cytoplasm;cytoplasmic part;cytosol;intracellular part	10	10	6	7	7	8	7	6	8	7	6	5	14.2	87.498	Q15052;B7Z3C7;F5H8B2;Q15052-2	Q15052;B7Z3C7;F5H8B2;Q15052-2	Rho guanine nucleotide exchange factor 6	23.3206	22.5471	23.0201	23.0927	22.9363	22.4583	22.9724	22.5671	23.0126
ARHGEF7	16	Regulation of actin cytoskeleton	3D-structure;Alternativesplicing;Celljunction;Cellprojection;Completeproteome;Cytoplasm;Guanine-nucleotidereleasingfactor;Neurogenesis;Phosphoprotein;Polymorphism;Referenceproteome;SH3domain	anatomical structure development;apoptosis;biological regulation;cell death;cell surface receptor linked signaling pathway;cellular process;cellular response to stimulus;death;developmental process;enzyme linked receptor protein signaling pathway;epidermal growth factor receptor signaling pathway;induction of apoptosis;induction of apoptosis by extracellular signals;induction of programmed cell d…	binding;enzyme regulator activity;GTPase regulator activity;guanyl-nucleotide exchange factor activity;nucleoside-triphosphatase regulator activity;protein binding;Ras guanyl-nucleotide exchange factor activity;Rho guanyl-nucleotide exchange factor activity;small GTPase regulator activity	adherens junction;anchoring junction;cell cortex;cell junction;cell part;cell projection;cell-substrate adherens junction;cell-substrate junction;cytoplasmic part;cytosol;focal adhesion;intracellular;intracellular part;macromolecular complex;protein complex;ruffle	7	3	3	5	3	5	5	4	6	6	4	5	9.8	82.57	Q14155-5;B7Z6G2;B1ALK7;Q14155-1;Q14155;Q14155-3;Q14155-2;Q14155-6;H0YFH7;E9PDQ5;E7EUY6;E7EU80;E7ENL8;B1ANY6;C9JDI6;C9JAD7	Q14155-5;B7Z6G2;B1ALK7;Q14155-1;Q14155;Q14155-3;Q14155-2;Q14155-6	Rho guanine nucleotide exchange factor 7	19.177	NaN	NaN	18.9972	NaN	NaN	NaN	NaN	17.7562
ARID1A	7		3D-structure;Acetylation;Alternativesplicing;Chromatinregulator;Completeproteome;Directproteinsequencing;DNA-binding;Neurogenesis;Nucleus;Phosphoprotein;Polymorphism;Referenceproteome;Transcription;Transcriptionregulation	anatomical structure development;androgen receptor signaling pathway;biological regulation;biosynthetic process;cellular biosynthetic process;cellular component disassembly;cellular component disassembly at cellular level;cellular component organization;cellular component organization at cellular level;cellular component organization or biogenesis;cellular component organization or biogenesis at …	binding;DNA binding;ligand-dependent nuclear receptor binding;nucleic acid binding;protein binding;protein binding transcription factor activity;receptor binding;transcription coactivator activity;transcription cofactor activity;transcription factor binding transcription factor activity	cell part;chromatin;chromatin remodeling complex;chromosomal part;intracellular organelle part;intracellular part;macromolecular complex;nBAF complex;npBAF complex;nuclear chromatin;nuclear chromosome part;nuclear part;organelle part;protein complex;SWI/SNF complex;SWI/SNF-type complex	21	21	19	13	11	12	6	7	8	5	6	10	17.6	242.04	O14497;O14497-2;O14497-3;H0Y488;Q96SM7;H0YEW5;H0YCU6	O14497;O14497-2;O14497-3	AT-rich interactive domain-containing protein 1A	22.0585	21.3689	22.1621	21.7652	21.4779	21.6064	21.1362	21.6559	21.9517
ARID1B	9		3D-structure;Acetylation;Alternativesplicing;Chromatinregulator;Completeproteome;DNA-binding;Neurogenesis;Nucleus;Phosphoprotein;Polymorphism;Referenceproteome;Transcription;Transcriptionregulation	anatomical structure development;biological regulation;biosynthetic process;cellular biosynthetic process;cellular component organization;cellular component organization at cellular level;cellular component organization or biogenesis;cellular component organization or biogenesis at cellular level;cellular macromolecule biosynthetic process;cellular macromolecule metabolic process;cellular metabol…	binding;DNA binding;nucleic acid binding;protein binding;protein binding transcription factor activity;transcription coactivator activity;transcription cofactor activity;transcription factor binding transcription factor activity	cell part;chromatin remodeling complex;intracellular;intracellular membrane-bounded organelle;intracellular organelle;intracellular organelle part;intracellular part;macromolecular complex;membrane-bounded organelle;nuclear part;nucleus;organelle;organelle part;protein complex;SWI/SNF complex;SWI/SNF-type complex	8	6	6	6	5	6	4	3	2	3	4	3	6.1	241.46	Q8NFD5-3;Q8NFD5-2;Q8NFD5;G3XAA0;H0Y7H8;Q8NFD5-4;H0Y2R3;C9JZD6;H0Y3S9	Q8NFD5-3;Q8NFD5-2;Q8NFD5;G3XAA0;H0Y7H8;Q8NFD5-4	AT-rich interactive domain-containing protein 1B	21.4744	19.2098	19.5275	21.0352	19.6219	NaN	21.1782	19.8186	NaN
ARID3A	6		3D-structure;Acetylation;Alternativesplicing;Completeproteome;Cytoplasm;DNA-binding;Nucleus;Phosphoprotein;Polymorphism;Referenceproteome;Transcription;Transcriptionregulation;Tumorsuppressor	biological regulation;biosynthetic process;cellular biosynthetic process;cellular macromolecule biosynthetic process;cellular macromolecule metabolic process;cellular metabolic process;cellular nitrogen compound metabolic process;cellular process;macromolecule biosynthetic process;macromolecule metabolic process;metabolic process;nitrogen compound metabolic process;nucleic acid metabolic process;…	binding;DNA binding;nucleic acid binding;nucleic acid binding transcription factor activity;sequence-specific DNA binding transcription factor activity	cell part;cytoplasm;intracellular;intracellular membrane-bounded organelle;intracellular organelle;intracellular part;membrane-bounded organelle;nucleus;organelle	3	3	3	0	1	1	0	1	2	0	1	3	6.4	62.888	Q99856;Q8IVW6;Q8IVW6-4;G8JLH7;Q8IVW6-3;H3BQ92	Q99856	AT-rich interactive domain-containing protein 3A	NaN	NaN	NaN	NaN	NaN	18.9466	NaN	NaN	20.4044
ARIH1	4		3D-structure;Coiledcoil;Completeproteome;Cytoplasm;Ligase;Metal-binding;Referenceproteome;Repeat;Ublconjugationpathway;Zinc;Zinc-finger	biological regulation;catabolic process;cell surface receptor linked signaling pathway;cellular catabolic process;cellular macromolecule catabolic process;cellular macromolecule metabolic process;cellular metabolic process;cellular process;cellular response to chemical stimulus;cellular response to cytokine stimulus;cellular response to organic substance;cellular response to stimulus;cytokine-med…	acid-amino acid ligase activity;binding;catalytic activity;cation binding;enzyme binding;ion binding;ligase activity;ligase activity, forming carbon-nitrogen bonds;metal ion binding;protein binding;small conjugating protein ligase activity;transition metal ion binding;ubiquitin protein ligase binding;ubiquitin-protein ligase activity;zinc ion binding	cell part;cytoplasmic part;cytosol;intracellular part;macromolecular complex;protein complex;ubiquitin ligase complex	3	3	3	2	2	3	3	3	3	2	3	3	6.6	64.117	Q9Y4X5;H0Y2Q2;H3BNB9;H3BSK4	Q9Y4X5;H0Y2Q2	E3 ubiquitin-protein ligase ARIH1	20.3442	20.5895	20.496	20.7972	20.7569	20.2713	21.5476	20.6098	20.7757
ARL2	2		3D-structure;Cellcycle;Completeproteome;Cytoplasm;Cytoskeleton;GTP-binding;Isopeptidebond;Lipoprotein;Mitochondrion;Myristate;Nucleotide-binding;Nucleus;Phosphoprotein;Polymorphism;Referenceproteome;Ublconjugation	biological regulation;cell cycle;cell junction assembly;cell junction organization;cell-cell junction assembly;cell-cell junction organization;cellular component assembly;cellular component assembly at cellular level;cellular component organization;cellular component organization at cellular level;cellular component organization or biogenesis;cellular component organization or biogenesis at cellu…	binding;catalytic activity;enzyme inhibitor activity;enzyme regulator activity;GTP binding;GTPase activity;GTPase inhibitor activity;GTPase regulator activity;guanyl nucleotide binding;guanyl ribonucleotide binding;hydrolase activity;hydrolase activity, acting on acid anhydrides;hydrolase activity, acting on acid anhydrides, in phosphorus-containing anhydrides;nucleoside-triphosphatase activity;n…	cell part;centrosome;cytoplasmic part;cytoskeletal part;intracellular;intracellular membrane-bounded organelle;intracellular non-membrane-bounded organelle;intracellular organelle;intracellular organelle part;intracellular part;lateral plasma membrane;membrane part;membrane-bounded organelle;membrane-enclosed lumen;microtubule organizing center;mitochondrial intermembrane space;mitochondrial part…	3	3	3	1	3	3	1	2	1	1	2	3	16.3	20.878	P36404;G3V184	P36404;G3V184	ADP-ribosylation factor-like protein 2	NaN	20.4151	18.5471	NaN	20.2671	NaN	NaN	19.2849	20.2123
ARL3	1		Cellcycle;Celldivision;Cellprojection;Completeproteome;Cytoplasm;Cytoskeleton;Directproteinsequencing;Golgiapparatus;GTP-binding;Lipoprotein;Magnesium;Membrane;Metal-binding;Myristate;Nucleotide-binding;Nucleus;Phosphoprotein;Polymorphism;Proteintransport;Referenceproteome;Transport	anatomical structure development;anatomical structure morphogenesis;biological regulation;cell cycle;cell development;cell part morphogenesis;cell projection morphogenesis;cell projection organization;cellular component morphogenesis;cellular component organization;cellular component organization at cellular level;cellular component organization or biogenesis;cellular component organization or bi…	binding;cation binding;cytoskeletal protein binding;GDP binding;GTP binding;guanyl nucleotide binding;guanyl ribonucleotide binding;ion binding;metal ion binding;microtubule binding;nucleotide binding;protein binding;purine nucleotide binding;purine ribonucleoside triphosphate binding;purine ribonucleotide binding;ribonucleotide binding;tubulin binding	cell part;cell projection;centrosome;cilium;cytoplasmic microtubule;cytoplasmic part;cytoskeletal part;Golgi apparatus part;Golgi membrane;intracellular membrane-bounded organelle;intracellular non-membrane-bounded organelle;intracellular organelle;intracellular organelle part;intracellular part;macromolecular complex;membrane;membrane-bounded organelle;microtubule;microtubule organizing center;m…	3	3	3	2	2	1	1	2	1	3	1	2	22	20.455	P36405	P36405	ADP-ribosylation factor-like protein 3	19.8342	20.284	NaN	NaN	20.3667	NaN	20.1067	NaN	20.9971
ARL6IP4	11		Alternativesplicing;Completeproteome;Phosphoprotein;Polymorphism;Referenceproteome;RNAediting	cellular macromolecule metabolic process;cellular metabolic process;cellular nitrogen compound metabolic process;cellular process;macromolecule metabolic process;metabolic process;nitrogen compound metabolic process;nucleic acid metabolic process;nucleobase-containing compound metabolic process;primary metabolic process;RNA metabolic process;RNA processing;RNA splicing		cell part;intracellular membrane-bounded organelle;intracellular organelle;intracellular part;membrane-bounded organelle;nucleus;organelle	2	2	2	1	2	2	0	1	1	1	1	1	7.8	38.395	Q66PJ3;Q66PJ3-2;Q66PJ3-3;Q66PJ3-4;F8WCT1;B3V0L1;H7BZV4;F5GYV5;F5H7X4;Q66PJ3-5;F8WEP2	Q66PJ3;Q66PJ3-2;Q66PJ3-3;Q66PJ3-4;F8WCT1;B3V0L1;H7BZV4;F5GYV5;F5H7X4;Q66PJ3-5;F8WEP2	ADP-ribosylation factor-like protein 6-interacting protein 4	NaN	19.3701	18.8494	NaN	NaN	NaN	NaN	NaN	NaN
ARL6IP5	6		Acetylation;Completeproteome;Cytoplasm;Directproteinsequencing;Endoplasmicreticulum;Membrane;Referenceproteome;Transmembrane;Transmembranehelix	acidic amino acid transport;amine transport;amino acid transport;anion transport;carboxylic acid transport;establishment of localization;ion transport;L-glutamate transport;nitrogen compound transport;organic acid transport;organic anion transport;organic substance transport;transport		cell part;cytoplasmic part;endoplasmic reticulum membrane;endoplasmic reticulum part;integral to membrane;intracellular organelle part;intracellular part;intrinsic to membrane;membrane;membrane part;organelle membrane;organelle part	2	2	2	2	2	1	2	2	2	2	2	2	14.9	21.614	O75915;E9PER8;B4DWQ6;F8WF33;C9JQU6;F8WF90	O75915;E9PER8;B4DWQ6;F8WF33;C9JQU6;F8WF90	PRA1 family protein 3	23.5043	NaN	NaN	22.0543	NaN	22.3606	21.9351	NaN	21.3686
ARL8B	2		3D-structure;Acetylation;Cellcycle;Celldivision;Completeproteome;Cytoplasm;Cytoskeleton;Directproteinsequencing;Endosome;GTP-binding;Lysosome;Membrane;Nucleotide-binding;Referenceproteome	biological regulation;cell cycle;cell division;cellular process;cellular response to stimulus;chromosome segregation;intracellular signal transduction;regulation of biological process;regulation of cellular process;response to stimulus;signal transduction;small GTPase mediated signal transduction	alpha-tubulin binding;beta-tubulin binding;binding;catalytic activity;cytoskeletal protein binding;GDP binding;GTP binding;GTPase activity;guanyl nucleotide binding;guanyl ribonucleotide binding;hydrolase activity;hydrolase activity, acting on acid anhydrides;hydrolase activity, acting on acid anhydrides, in phosphorus-containing anhydrides;nucleoside-triphosphatase activity;nucleotide binding;pr…	cell part;cytoplasmic part;cytoskeletal part;endosomal part;endosome membrane;intracellular;intracellular organelle part;intracellular part;late endosome membrane;lysosomal membrane;membrane;midbody;organelle membrane;organelle part;spindle midzone;vacuolar membrane;vacuolar part	2	2	2	0	1	2	1	0	1	1	0	0	12.4	21.539	Q9NVJ2;B4DI85	Q9NVJ2;B4DI85	ADP-ribosylation factor-like protein 8B	NaN	NaN	21.9308	NaN	NaN	NaN	NaN	NaN	NaN
ARMC6	11		Alternativesplicing;Completeproteome;Phosphoprotein;Referenceproteome;Repeat		binding		2	2	2	1	1	1	1	2	1	2	1	2	5.8	54.141	Q6NXE6;Q6NXE6-2;F5H4P3;F5GWV0;F5GWK8;F5H2K4;F5H2X2;F5H052;F5H3X1;F5GZP0;F5H7V0	Q6NXE6;Q6NXE6-2;F5H4P3;F5GWV0;F5GWK8;F5H2K4;F5H2X2;F5H052;F5H3X1;F5GZP0;F5H7V0	Armadillo repeat-containing protein 6	NaN	NaN	NaN	NaN	21.1626	NaN	21.038	NaN	21.3418
ARMC8	14		Acetylation;Alternativesplicing;Completeproteome;Directproteinsequencing;Phosphoprotein;Referenceproteome;Repeat		binding		2	2	2	1	1	2	1	2	2	2	1	1	3	75.509	Q8IUR7;A8MTG8;Q8IUR7-2;F5GWK4;Q8IUR7-3;B7Z441;B7Z637;H0YGM5;G5E9V6;Q8IUR7-6;G5E9V7;C9JBY2;C9JAA7;C9J8P8	Q8IUR7;A8MTG8;Q8IUR7-2;F5GWK4;Q8IUR7-3;B7Z441;B7Z637;H0YGM5;G5E9V6;Q8IUR7-6;G5E9V7;C9JBY2;C9JAA7;C9J8P8	Armadillo repeat-containing protein 8	NaN	NaN	21.3604	NaN	20.921	19.9805	20.3487	NaN	NaN
ARPC1B	10	Bacterial invasion of epithelial cells;Fc gamma R-mediated phagocytosis;Pathogenic Escherichia coli infection;Regulation of actin cytoskeleton;Shigellosis	Acetylation;Actin-binding;Completeproteome;Cytoplasm;Cytoskeleton;Directproteinsequencing;Phosphoprotein;Polymorphism;Referenceproteome;Repeat;WDrepeat	biological regulation;cellular component movement;cellular component organization;cellular component organization or biogenesis;cellular process;regulation of actin cytoskeleton organization;regulation of actin filament length;regulation of actin filament polymerization;regulation of actin filament-based process;regulation of actin polymerization or depolymerization;regulation of anatomical struc…	actin binding;binding;cytoskeletal protein binding;protein binding;structural constituent of cytoskeleton;structural molecule activity	Arp2/3 protein complex;cell part;cytoplasm;cytoskeletal part;cytoskeleton;intracellular non-membrane-bounded organelle;intracellular organelle;intracellular organelle part;intracellular part;macromolecular complex;non-membrane-bounded organelle;organelle;organelle part;protein complex	6	6	6	1	3	3	0	0	1	0	2	2	17.2	40.949	O15143;F8WCG3;C9J6C8;C9JFG9;C9JQM8;C9JEY1;C9J4Z7;C9K057;C9JBJ7;C9JTT6	O15143;F8WCG3	Actin-related protein 2/3 complex subunit 1B	NaN	22.6465	23.3149	NaN	NaN	NaN	NaN	22.2512	20.1338
ARPC2	6	Bacterial invasion of epithelial cells;Fc gamma R-mediated phagocytosis;Pathogenic Escherichia coli infection;Regulation of actin cytoskeleton;Shigellosis	Acetylation;Actin-binding;Cellprojection;Completeproteome;Cytoplasm;Cytoskeleton;Directproteinsequencing;Referenceproteome	biological regulation;cellular component movement;cellular component organization;cellular component organization or biogenesis;cellular process;regulation of actin cytoskeleton organization;regulation of actin filament length;regulation of actin filament polymerization;regulation of actin filament-based process;regulation of actin polymerization or depolymerization;regulation of anatomical struc…	actin binding;binding;cytoskeletal protein binding;protein binding;structural constituent of cytoskeleton;structural molecule activity	Arp2/3 protein complex;cell part;cell projection;cytoplasmic part;cytoskeletal part;cytoskeleton;Golgi apparatus;intracellular membrane-bounded organelle;intracellular non-membrane-bounded organelle;intracellular organelle;intracellular organelle part;intracellular part;macromolecular complex;membrane-bounded organelle;non-membrane-bounded organelle;organelle;organelle part;protein complex	14	14	14	5	11	12	7	8	12	5	8	12	47.3	34.333	O15144;E7EWG5;G5E9J0;C9JTV5;H7C3F9;G5E9S7	O15144;E7EWG5	Actin-related protein 2/3 complex subunit 2	23.6046	23.728	24.8305	24.0423	23.8789	24.8226	24.1324	23.7118	24.3917
ARPC3	4	Bacterial invasion of epithelial cells;Fc gamma R-mediated phagocytosis;Pathogenic Escherichia coli infection;Regulation of actin cytoskeleton;Shigellosis	Acetylation;Actin-binding;Cellprojection;Completeproteome;Cytoplasm;Cytoskeleton;Directproteinsequencing;Phosphoprotein;Referenceproteome	biological regulation;cellular component movement;cellular component organization;cellular component organization or biogenesis;cellular process;regulation of actin cytoskeleton organization;regulation of actin filament length;regulation of actin filament polymerization;regulation of actin filament-based process;regulation of actin polymerization or depolymerization;regulation of anatomical struc…	actin binding;binding;cytoskeletal protein binding;protein binding;structural constituent of cytoskeleton;structural molecule activity	Arp2/3 protein complex;cell part;cytoplasm;cytoskeletal part;cytoskeleton;intracellular non-membrane-bounded organelle;intracellular organelle;intracellular organelle part;intracellular part;macromolecular complex;non-membrane-bounded organelle;organelle;organelle part;protein complex	5	5	5	3	5	4	3	3	3	3	3	3	39.3	20.546	O15145;B4DM63;C9JZD1;F8VR50	O15145;B4DM63;C9JZD1	Actin-related protein 2/3 complex subunit 3	24.0629	23.8238	24.3992	23.2003	23.2124	24.1706	24.189	23.7755	24.3031
ARPC4;ARPC4-TTLL3	9	Bacterial invasion of epithelial cells;Fc gamma R-mediated phagocytosis;Pathogenic Escherichia coli infection;Regulation of actin cytoskeleton;Shigellosis	Acetylation;Actin-binding;Cellprojection;Completeproteome;Cytoplasm;Cytoskeleton;Directproteinsequencing;Referenceproteome	actin cytoskeleton organization;actin filament organization;actin filament polymerization;actin filament-based process;actin nucleation;actin polymerization or depolymerization;biological regulation;cellular component assembly;cellular component assembly at cellular level;cellular component organization;cellular component organization at cellular level;cellular component organization or biogenesi…	acid-amino acid ligase activity;actin binding;binding;catalytic activity;cytoskeletal protein binding;ligase activity;ligase activity, forming carbon-nitrogen bonds;protein binding;tubulin-tyrosine ligase activity	Arp2/3 protein complex;cell part;cell projection;cytoplasm;cytoskeletal part;cytoskeleton;intracellular non-membrane-bounded organelle;intracellular organelle;intracellular organelle part;intracellular part;macromolecular complex;non-membrane-bounded organelle;organelle;organelle part;protein complex	6	6	6	5	5	6	4	4	5	5	5	4	31.6	21.588	C9JWM7;F8WCF6;P59998;E7ETI0;H7C0A3;F8WDD7;F6TTL5;F8WE39;F8WDW3	C9JWM7;F8WCF6;P59998;E7ETI0;H7C0A3;F8WDD7	Actin-related protein 2/3 complex subunit 4	25.3343	24.8788	25.528	23.8847	24.1793	25.4234	25.1991	24.8538	25.9969
ARPC5	3	Bacterial invasion of epithelial cells;Fc gamma R-mediated phagocytosis;Pathogenic Escherichia coli infection;Regulation of actin cytoskeleton;Shigellosis	Actin-binding;Alternativesplicing;Cellprojection;Completeproteome;Cytoplasm;Cytoskeleton;Directproteinsequencing;Referenceproteome	actin cytoskeleton organization;actin filament-based process;biological regulation;cellular component movement;cellular component organization;cellular component organization at cellular level;cellular component organization or biogenesis;cellular component organization or biogenesis at cellular level;cellular process;cytoskeleton organization;organelle organization;regulation of actin cytoskelet…	actin binding;binding;cytoskeletal protein binding;protein binding;structural constituent of cytoskeleton;structural molecule activity	Arp2/3 protein complex;cell part;cytoplasm;cytoskeletal part;cytoskeleton;intracellular non-membrane-bounded organelle;intracellular organelle;intracellular organelle part;intracellular part;macromolecular complex;non-membrane-bounded organelle;organelle;organelle part;protein complex	3	2	2	2	3	3	3	3	3	2	2	2	21.9	16.32	O15511;O15511-2;B1ALC0	O15511;O15511-2;B1ALC0	Actin-related protein 2/3 complex subunit 5	24.3579	23.4182	24.1605	23.6066	23.4485	24.1024	24.0056	23.8432	24.7778
ARPC5L	1	Bacterial invasion of epithelial cells;Fc gamma R-mediated phagocytosis;Pathogenic Escherichia coli infection;Regulation of actin cytoskeleton;Shigellosis	Actin-binding;Completeproteome;Cytoplasm;Cytoskeleton;Directproteinsequencing;Phosphoprotein;Referenceproteome	biological regulation;cellular component organization;cellular component organization or biogenesis;regulation of actin cytoskeleton organization;regulation of actin filament length;regulation of actin filament polymerization;regulation of actin filament-based process;regulation of actin polymerization or depolymerization;regulation of anatomical structure size;regulation of biological process;re…	actin binding;binding;cytoskeletal protein binding;protein binding	cell part;cytoplasm;cytoskeleton;intracellular non-membrane-bounded organelle;intracellular organelle;intracellular part;non-membrane-bounded organelle;organelle	3	3	2	2	2	3	3	3	3	2	2	2	21.6	16.941	Q9BPX5	Q9BPX5	Actin-related protein 2/3 complex subunit 5-like protein	21.3767	21.2193	21.5433	20.5355	21.6146	21.599	21.4494	21.3334	22.0665
ARRB1	4	Chemokine signaling pathway;Endocytosis;MAPK signaling pathway;Phototransduction	3D-structure;Alternativesplicing;Cellmembrane;Cellprojection;Coatedpit;Completeproteome;Cytoplasm;Cytoplasmicvesicle;Membrane;Nucleus;Phosphoprotein;Proteintransport;Referenceproteome;Signaltransductioninhibitor;Transcription;Transcriptionregulation;Transport;Ublconjugation	actin cytoskeleton organization;actin filament bundle assembly;actin filament organization;actin filament-based process;biological regulation;biosynthetic process;catabolic process;cell activation;cellular biosynthetic process;cellular catabolic process;cellular component assembly;cellular component assembly at cellular level;cellular component organization;cellular component organization at cell…	angiotensin receptor binding;binding;DNA binding;enzyme activator activity;enzyme binding;enzyme inhibitor activity;enzyme regulator activity;G-protein-coupled receptor binding;GTPase activator activity;GTPase regulator activity;insulin-like growth factor receptor binding;nucleic acid binding;nucleoside-triphosphatase regulator activity;protein binding;receptor binding;regulatory region DNA bindi…	cell fraction;cell part;cell projection;chromatin;chromosomal part;coated pit;cytoplasmic part;cytoplasmic vesicle membrane;cytoplasmic vesicle part;cytosol;Golgi apparatus part;Golgi membrane;insoluble fraction;intracellular membrane-bounded organelle;intracellular organelle;intracellular organelle part;intracellular part;lysosomal membrane;membrane;membrane fraction;membrane part;membrane-bound…	7	7	7	5	4	5	3	6	5	4	6	5	27.3	47.065	P49407;P49407-2;E9PM35;H0YET9	P49407;P49407-2;E9PM35	Beta-arrestin-1	22.3847	21.444	21.6955	21.9493	22.8223	22.4913	21.9517	22.4903	21.9632
ARRB2	5	Chemokine signaling pathway;Endocytosis;MAPK signaling pathway;Phototransduction	Alternativesplicing;Cellmembrane;Coatedpit;Completeproteome;Cytoplasm;Cytoplasmicvesicle;Membrane;Nucleus;Phosphoprotein;Proteintransport;Referenceproteome;Signaltransductioninhibitor;Transport;Ublconjugation	adaptation of signaling pathway;biological regulation;biosynthetic process;catabolic process;cell activation;cell chemotaxis;cell migration;cell motility;cell surface receptor linked signaling pathway;cellular biosynthetic process;cellular catabolic process;cellular component movement;cellular component organization;cellular component organization or biogenesis;cellular macromolecule biosynthetic…	angiotensin receptor binding;binding;enzyme binding;G-protein-coupled receptor binding;protein binding;receptor binding;ubiquitin protein ligase binding	cell part;coated pit;cytoplasmic membrane-bounded vesicle;cytoplasmic part;cytoplasmic vesicle;cytosol;intracellular membrane-bounded organelle;intracellular organelle;intracellular part;membrane;membrane part;membrane-bounded organelle;membrane-bounded vesicle;nucleus;organelle;plasma membrane;vesicle	4	4	4	2	3	3	0	2	3	1	1	3	13.5	47.271	P32121-3;Q59EM5;P32121;P32121-2;G5E980	P32121-3;Q59EM5;P32121;P32121-2;G5E980	Beta-arrestin-2	18.3499	18.2605	19.9783	NaN	18.9541	19.6411	NaN	NaN	19.3206
ARSA	2	Lysosome;Sphingolipid metabolism	3D-structure;Calcium;Completeproteome;Directproteinsequencing;Diseasemutation;Disulfidebond;Glycoprotein;Hydrolase;Ichthyosis;Leukodystrophy;Lysosome;Metachromaticleukodystrophy;Metal-binding;Polymorphism;Referenceproteome;Signal	cellular lipid metabolic process;cellular metabolic process;cellular process;glycolipid metabolic process;glycosphingolipid metabolic process;lipid metabolic process;membrane lipid metabolic process;metabolic process;primary metabolic process;small molecule metabolic process;sphingolipid metabolic process	arylsulfatase activity;binding;calcium ion binding;catalytic activity;cation binding;cerebroside-sulfatase activity;hydrolase activity;hydrolase activity, acting on ester bonds;ion binding;metal ion binding;sulfuric ester hydrolase activity	cell part;cytoplasmic part;intracellular organelle lumen;intracellular organelle part;intracellular part;lysosomal lumen;membrane-enclosed lumen;organelle lumen;organelle part;vacuolar lumen;vacuolar part	3	3	3	0	1	2	2	0	1	2	1	2	9.3	53.588	P15289;F8WCC8	P15289;F8WCC8	Arylsulfatase A;Arylsulfatase A component B;Arylsulfatase A component C	NaN	NaN	18.9863	19.6348	NaN	NaN	20.4185	NaN	19.9708
ASAH1	5	Lysosome;Sphingolipid metabolism	Alternativesplicing;Completeproteome;Directproteinsequencing;Diseasemutation;Glycoprotein;Hydrolase;Lysosome;Polymorphism;Referenceproteome;Signal	cellular lipid metabolic process;cellular metabolic process;cellular process;ceramide metabolic process;glycolipid metabolic process;glycosphingolipid metabolic process;lipid metabolic process;membrane lipid metabolic process;metabolic process;primary metabolic process;small molecule metabolic process;sphingoid metabolic process;sphingolipid metabolic process	catalytic activity;ceramidase activity;hydrolase activity;hydrolase activity, acting on carbon-nitrogen (but not peptide) bonds;hydrolase activity, acting on carbon-nitrogen (but not peptide) bonds, in linear amides	cell part;cytoplasmic part;intracellular membrane-bounded organelle;intracellular organelle;intracellular organelle lumen;intracellular organelle part;intracellular part;lysosomal lumen;lysosome;lytic vacuole;membrane-bounded organelle;membrane-enclosed lumen;organelle;organelle lumen;organelle part;vacuolar lumen;vacuolar part;vacuole	8	8	8	2	4	4	3	4	4	2	3	5	23.6	46.503	Q13510-2;Q13510;E7EMM4;E7ERV9;E9PDS0	Q13510-2;Q13510;E7EMM4;E7ERV9;E9PDS0	Acid ceramidase;Acid ceramidase subunit alpha;Acid ceramidase subunit beta	20.5995	21.5475	22.2781	21.4149	21.0181	22.3416	21.977	20.7054	22.6336
ASF1A	1		3D-structure;Chaperone;Chromatinregulator;Completeproteome;Nucleus;Phosphoprotein;Referenceproteome;Transcription;Transcriptionregulation	biological regulation;biosynthetic process;cellular biosynthetic process;cellular component assembly;cellular component assembly at cellular level;cellular component organization;cellular component organization at cellular level;cellular component organization or biogenesis;cellular component organization or biogenesis at cellular level;cellular macromolecular complex assembly;cellular macromolec…	binding;chromatin binding;histone binding;protein binding	cell part;chromatin remodeling complex;intracellular organelle part;intracellular part;macromolecular complex;nuclear part;organelle part;protein complex	3	3	3	0	3	2	0	0	1	0	0	0	26.5	22.968	Q9Y294	Q9Y294	Histone chaperone ASF1A	NaN	19.5529	NaN	NaN	NaN	NaN	NaN	NaN	NaN
ASH2L	4		3D-structure;Alternativesplicing;Chromatinregulator;Completeproteome;DNA-binding;Metal-binding;Nucleus;Polymorphism;Referenceproteome;Transcription;Transcriptionregulation;Zinc;Zinc-finger	anatomical structure development;biological regulation;biosynthetic process;cellular biosynthetic process;cellular component organization;cellular component organization at cellular level;cellular component organization or biogenesis;cellular component organization or biogenesis at cellular level;cellular macromolecule biosynthetic process;cellular macromolecule metabolic process;cellular metabol…	binding;cation binding;DNA binding;ion binding;metal ion binding;nucleic acid binding;protein binding;regulatory region DNA binding;regulatory region nucleic acid binding;transcription regulatory region DNA binding	cell part;chromatin remodeling complex;histone methyltransferase complex;intracellular organelle part;intracellular part;macromolecular complex;methyltransferase complex;nuclear part;nucleoplasm part;organelle part;protein complex;Set1C/COMPASS complex	2	2	2	2	2	1	2	2	1	2	2	2	4.3	68.722	Q9UBL3;Q9UBL3-3;Q9UBL3-2;F5H8F7	Q9UBL3;Q9UBL3-3;Q9UBL3-2;F5H8F7	Set1/Ash2 histone methyltransferase complex subunit ASH2	20.5426	19.6332	NaN	21.1091	20.0482	NaN	20.8054	19.7831	19.7789
ASL	5	Alanine, aspartate and glutamate metabolism;Arginine and proline metabolism	3D-structure;Acetylation;Amino-acidbiosynthesis;Argininebiosynthesis;Completeproteome;Diseasemutation;Lyase;Polymorphism;Referenceproteome;Ureacycle	amide biosynthetic process;amine biosynthetic process;amine catabolic process;amine metabolic process;arginine biosynthetic process;arginine biosynthetic process via ornithine;arginine catabolic process;arginine metabolic process;biosynthetic process;carboxylic acid biosynthetic process;carboxylic acid catabolic process;carboxylic acid metabolic process;catabolic process;cellular amide metabolic …	amidine-lyase activity;argininosuccinate lyase activity;carbon-nitrogen lyase activity;catalytic activity;lyase activity	cell part;cytoplasmic part;cytosol;intracellular part	2	2	2	1	1	2	1	0	1	2	0	1	4.3	51.657	P04424;E7EMI0;E9PE48;H7C0S8;F8W943	P04424;E7EMI0;E9PE48;H7C0S8;F8W943	Argininosuccinate lyase	NaN	NaN	NaN	NaN	NaN	NaN	20.1059	NaN	NaN
ASMTL	4		3D-structure;Alternativesplicing;Completeproteome;Phosphoprotein;Polymorphism;Referenceproteome		catalytic activity;methyltransferase activity;O-methyltransferase activity;transferase activity;transferase activity, transferring one-carbon groups	cell part;cytoplasm;intracellular part	7	7	7	1	3	3	3	2	2	2	2	3	19	68.856	O95671;O95671-2;F5GXH4;E7ER97	O95671;O95671-2;F5GXH4	N-acetylserotonin O-methyltransferase-like protein	NaN	19.8987	20.0228	20.9037	20.8972	20.1727	20.424	20.4762	20.2323
ASNA1	2		Acetylation;ATP-binding;Completeproteome;Cytoplasm;Endoplasmicreticulum;Hydrolase;Metal-binding;Nucleotide-binding;Nucleus;Polymorphism;Referenceproteome;Transport;Zinc	detoxification of arsenic-containing substance;response to arsenic-containing substance;response to chemical stimulus;response to inorganic substance;response to stimulus;response to toxin	adenyl nucleotide binding;adenyl ribonucleotide binding;anion transmembrane transporter activity;arsenite transmembrane transporter activity;ATP binding;ATPase activity;binding;catalytic activity;cation binding;hydrolase activity;hydrolase activity, acting on acid anhydrides;hydrolase activity, acting on acid anhydrides, in phosphorus-containing anhydrides;inorganic anion transmembrane transporte…	cell fraction;cell part;cytoplasmic part;endoplasmic reticulum;intracellular membrane-bounded organelle;intracellular non-membrane-bounded organelle;intracellular organelle;intracellular organelle part;intracellular part;membrane-bounded organelle;non-membrane-bounded organelle;nuclear part;nucleolus;organelle;organelle part;soluble fraction	7	7	7	5	5	3	5	5	5	4	5	4	30.5	38.792	O43681;E7EVN0	O43681;E7EVN0	ATPase ASNA1	23.3886	23.5419	23.2428	23.0846	23.3593	23.3131	23.3875	23.166	23.7163
ASNS	8	Alanine, aspartate and glutamate metabolism;Nitrogen metabolism	Acetylation;Amino-acidbiosynthesis;Asparaginebiosynthesis;ATP-binding;Completeproteome;Glutamineamidotransferase;Ligase;Nucleotide-binding;Phosphoprotein;Polymorphism;Referenceproteome	activation of signaling protein activity involved in unfolded protein response;amine biosynthetic process;amine metabolic process;asparagine biosynthetic process;asparagine metabolic process;aspartate family amino acid biosynthetic process;aspartate family amino acid metabolic process;biological regulation;biosynthetic process;carboxylic acid biosynthetic process;carboxylic acid metabolic process…	adenyl nucleotide binding;adenyl ribonucleotide binding;asparagine synthase (glutamine-hydrolyzing) activity;ATP binding;binding;carbon-nitrogen ligase activity, with glutamine as amido-N-donor;catalytic activity;ligase activity;ligase activity, forming carbon-nitrogen bonds;nucleotide binding;purine nucleotide binding;purine ribonucleoside triphosphate binding;purine ribonucleotide binding;ribon…	cell fraction;cell part;cytoplasmic part;cytosol;intracellular part;soluble fraction	10	10	10	0	7	7	0	4	5	0	6	4	22.6	64.369	P08243;E9PCI3;E9PCX6;F8WEJ5;C9J057;C9JT45;C9JM09;C9JLN6	P08243;E9PCI3;E9PCX6;F8WEJ5	Asparagine synthetase [glutamine-hydrolyzing];Asparagine synthetase	NaN	23.1027	21.9193	NaN	22.6822	23.0735	NaN	23.1133	22.5215
ASPSCR1	5		Acetylation;Alternativesplicing;Chromosomalrearrangement;Completeproteome;Membrane;Phosphoprotein;Polymorphism;Proto-oncogene;Referenceproteome		binding;protein binding		6	6	6	6	5	4	3	4	2	3	4	4	15.6	69.989	Q9BZE9-2;Q9BZE9;Q9BZE9-3;C9JAL9;Q9BZE9-4	Q9BZE9-2;Q9BZE9;Q9BZE9-3;C9JAL9;Q9BZE9-4	Tether containing UBX domain for GLUT4	21.5416	20.0763	20.2918	20.6218	20.7614	20.7647	20.5777	20.4486	20.8231
ASRGL1	4		Acetylation;Alternativesplicing;Completeproteome;Cytoplasm;Hydrolase;Referenceproteome	amine catabolic process;amine metabolic process;asparagine catabolic process;asparagine catabolic process via L-aspartate;asparagine metabolic process;aspartate family amino acid catabolic process;aspartate family amino acid metabolic process;carboxylic acid catabolic process;carboxylic acid metabolic process;catabolic process;cellular amine metabolic process;cellular amino acid catabolic process…	asparaginase activity;catalytic activity;hydrolase activity;hydrolase activity, acting on carbon-nitrogen (but not peptide) bonds;hydrolase activity, acting on carbon-nitrogen (but not peptide) bonds, in linear amides;N4-(beta-N-acetylglucosaminyl)-L-asparaginase activity	cell part;cytoplasm;cytoskeleton;intracellular membrane-bounded organelle;intracellular non-membrane-bounded organelle;intracellular organelle;intracellular part;membrane-bounded organelle;microtubule cytoskeleton;non-membrane-bounded organelle;nucleus;organelle	2	2	2	0	0	1	0	0	1	0	0	0	10.4	32.054	Q7L266;Q7L266-2;B4DLU4;E9PJK6	Q7L266;Q7L266-2;B4DLU4;E9PJK6	L-asparaginase	NaN	NaN	17.8638	NaN	NaN	NaN	NaN	NaN	NaN
Asun;ASUN	9		Cellcycle;Celldivision;Coiledcoil;Completeproteome;Mitosis;Phosphoprotein;Polymorphism;Referenceproteome	biological regulation;cell cycle phase;cell cycle process;cell division;cell motility;cellular component movement;cellular component organization;cellular component organization at cellular level;cellular component organization or biogenesis;cellular component organization or biogenesis at cellular level;cellular process;locomotion;mitosis;nuclear division;organelle fission;organelle organization…	binding;protein binding	cell part;cytoplasm;intracellular membrane-bounded organelle;intracellular organelle;intracellular part;membrane-bounded organelle;nucleus;organelle	4	4	4	4	3	3	3	3	2	3	4	4	6.4	80.224	Q9NVM9;B4DNK1;H0YI01;H0YH12;F5GZE7;F5H457;F5H5W1;H0YIA9;H7BXF9	Q9NVM9;B4DNK1;H0YI01	Protein asunder homolog	20.6117	20.1396	20.086	20.298	20.4871	19.9525	20.1901	20.6184	20.6199
ATAD2	2		3D-structure;Activator;Alternativesplicing;ATP-binding;Bromodomain;Coiledcoil;Completeproteome;Hydrolase;Nucleotide-binding;Nucleus;Phosphoprotein;Polymorphism;Referenceproteome;Transcription;Transcriptionregulation	biological regulation;biosynthetic process;cellular biosynthetic process;cellular macromolecule biosynthetic process;cellular macromolecule metabolic process;cellular metabolic process;cellular nitrogen compound metabolic process;cellular process;macromolecule biosynthetic process;macromolecule metabolic process;metabolic process;nitrogen compound metabolic process;nucleic acid metabolic process;…	adenyl nucleotide binding;adenyl ribonucleotide binding;ATP binding;ATPase activity;binding;catalytic activity;hydrolase activity;hydrolase activity, acting on acid anhydrides;hydrolase activity, acting on acid anhydrides, in phosphorus-containing anhydrides;nucleoside-triphosphatase activity;nucleotide binding;purine nucleotide binding;purine ribonucleoside triphosphate binding;purine ribonucleo…	cell part;intracellular membrane-bounded organelle;intracellular organelle;intracellular part;membrane-bounded organelle;nucleus;organelle	6	6	5	1	3	3	1	3	3	0	1	2	6.1	158.55	Q6PL18;Q6PL18-2	Q6PL18	ATPase family AAA domain-containing protein 2	NaN	20.1589	19.8052	NaN	20.2986	20.2512	NaN	NaN	NaN
ATAD2B	4		3D-structure;Alternativesplicing;ATP-binding;Bromodomain;Coiledcoil;Completeproteome;Nucleotide-binding;Phosphoprotein;Polymorphism;Referenceproteome		adenyl nucleotide binding;adenyl ribonucleotide binding;ATP binding;binding;catalytic activity;hydrolase activity;hydrolase activity, acting on acid anhydrides;hydrolase activity, acting on acid anhydrides, in phosphorus-containing anhydrides;nucleoside-triphosphatase activity;nucleotide binding;purine nucleotide binding;purine ribonucleoside triphosphate binding;purine ribonucleotide binding;pyr…		2	1	1	1	1	0	1	1	2	0	0	0	1.9	164.91	Q9ULI0;Q9ULI0-2;H7BYF1;B3KWS5	Q9ULI0;Q9ULI0-2;H7BYF1;B3KWS5	ATPase family AAA domain-containing protein 2B	NaN	NaN	NaN	NaN	NaN	16.2398	NaN	NaN	NaN
ATAD3A	12		Acetylation;Alternativesplicing;ATP-binding;Coiledcoil;Completeproteome;Directproteinsequencing;Nucleotide-binding;Phosphoprotein;Polymorphism;Referenceproteome	biological regulation;cell growth;cellular process;growth;negative regulation of apoptosis;negative regulation of biological process;negative regulation of cell death;negative regulation of cellular process;negative regulation of programmed cell death;regulation of apoptosis;regulation of biological process;regulation of cell death;regulation of cellular process;regulation of programmed cell death	adenyl nucleotide binding;adenyl ribonucleotide binding;ATP binding;binding;catalytic activity;hydrolase activity;hydrolase activity, acting on acid anhydrides;hydrolase activity, acting on acid anhydrides, in phosphorus-containing anhydrides;nucleoside-triphosphatase activity;nucleotide binding;purine nucleotide binding;purine ribonucleoside triphosphate binding;purine ribonucleotide binding;pyr…	cell part;cytoplasmic part;intracellular membrane-bounded organelle;intracellular organelle;intracellular part;membrane-bounded organelle;mitochondrion;organelle	15	15	5	10	8	7	7	7	10	7	7	7	34.8	66.217	Q9NVI7-2;Q9NVI7;H0Y2W2;G3V1I6;E9PDY1;Q5SV16;D3YTB2;A6NMA2;Q5T9A4-2;Q5SV15;A6NFL3;Q5T9A2	Q9NVI7-2;Q9NVI7;H0Y2W2;G3V1I6	ATPase family AAA domain-containing protein 3A	23.1578	23.1558	22.5345	22.4993	22.2009	23.7621	22.2961	23.0057	23.0192
ATG3	3	Regulation of autophagy	Acetylation;Alternativesplicing;Autophagy;Completeproteome;Cytoplasm;Isopeptidebond;Ligase;Phosphoprotein;Proteintransport;Referenceproteome;Transport;Ublconjugation;Ublconjugationpathway	apoptotic mitochondrial changes;autophagic vacuole assembly;cellular component assembly;cellular component assembly at cellular level;cellular component organization;cellular component organization at cellular level;cellular component organization or biogenesis;cellular component organization or biogenesis at cellular level;cellular macromolecule metabolic process;cellular metabolic process;cellu…	acid-amino acid ligase activity;Atg12 ligase activity;Atg8 ligase activity;binding;catalytic activity;enzyme binding;ligase activity;ligase activity, forming carbon-nitrogen bonds;protein binding;small conjugating protein ligase activity	cell part;cytoplasmic part;cytoplasmic ubiquitin ligase complex;cytosol;intracellular part;macromolecular complex;protein complex;ubiquitin ligase complex	3	3	3	1	2	1	2	1	2	2	2	1	13.1	35.864	Q9NT62;Q9NT62-2;F8WDI0	Q9NT62;Q9NT62-2	Ubiquitin-like-conjugating enzyme ATG3	NaN	21.2067	NaN	20.5375	NaN	21.3816	21.0933	20.8512	NaN
ATIC	8	One carbon pool by folate;Purine metabolism	3D-structure;Acetylation;Completeproteome;Directproteinsequencing;Diseasemutation;Epilepsy;Hydrolase;Multifunctionalenzyme;Phosphoprotein;Polymorphism;Purinebiosynthesis;Referenceproteome;Transferase	biosynthetic process;cellular aromatic compound metabolic process;cellular biosynthetic process;cellular metabolic process;cellular nitrogen compound biosynthetic process;cellular nitrogen compound metabolic process;cellular process;heterocycle biosynthetic process;heterocycle metabolic process;metabolic process;nitrogen compound metabolic process;nucleobase metabolic process;nucleobase-containin…	binding;catalytic activity;cyclohydrolase activity;hydrolase activity;hydrolase activity, acting on carbon-nitrogen (but not peptide) bonds;hydrolase activity, acting on carbon-nitrogen (but not peptide) bonds, in cyclic amidines;hydroxymethyl-, formyl- and related transferase activity;identical protein binding;IMP cyclohydrolase activity;phosphoribosylaminoimidazolecarboxamide formyltransferase …	cell part;cytoplasmic part;cytosol;intracellular part	26	26	26	16	21	21	19	21	22	17	20	18	55.4	64.615	P31939;E9PBU3;F5GWY2;H7C1S2;H7C084;C9JLK0;F8WEF0;H7BZU3	P31939;E9PBU3;F5GWY2	Bifunctional purine biosynthesis protein PURH;Phosphoribosylaminoimidazolecarboxamide formyltransferase;IMP cyclohydrolase	25.5846	26.2982	25.7626	25.9295	26.4608	26.2753	25.9476	26.4688	26.2028
ATL3	3		Acetylation;Coiledcoil;Completeproteome;Endoplasmicreticulum;GTP-binding;Hydrolase;Membrane;Nucleotide-binding;Phosphoprotein;Referenceproteome;Transmembrane;Transmembranehelix	cellular component assembly;cellular component organization;cellular component organization at cellular level;cellular component organization or biogenesis;cellular component organization or biogenesis at cellular level;cellular process;endoplasmic reticulum organization;Golgi organization;macromolecular complex assembly;macromolecular complex subunit organization;organelle organization;protein c…	binding;catalytic activity;GTP binding;GTPase activity;guanyl nucleotide binding;guanyl ribonucleotide binding;hydrolase activity;hydrolase activity, acting on acid anhydrides;hydrolase activity, acting on acid anhydrides, in phosphorus-containing anhydrides;identical protein binding;nucleoside-triphosphatase activity;nucleotide binding;protein binding;purine nucleotide binding;purine ribonucleos…	cell part;cytoplasmic part;endoplasmic reticulum membrane;endoplasmic reticulum part;integral to membrane;intracellular organelle part;intracellular part;intrinsic to membrane;membrane;membrane part;organelle membrane;organelle part	3	3	3	1	0	2	1	0	2	1	1	0	7	63.381	C9JUU1;Q6DD88;F5H6I7	C9JUU1;Q6DD88;F5H6I7	Atlastin-3	17.9174	NaN	NaN	NaN	NaN	NaN	NaN	NaN	NaN
ATP1A1	24	Aldosterone-regulated sodium reabsorption;Bile secretion;Carbohydrate digestion and absorption;Cardiac muscle contraction;Collecting duct acid secretion;Endocrine and other factor-regulated calcium reabsorption;Gastric acid secretion;Mineral absorption;Oxidative phosphorylation;Pancreatic secretion;Protein digestion and absorption;Proximal tubule bicarbonate reclamation;Salivary secretion	Acetylation;Alternativesplicing;ATP-binding;Cellmembrane;Completeproteome;Directproteinsequencing;Diseasemutation;Dystonia;Hydrogeniontransport;Hydrolase;Iontransport;Magnesium;Membrane;Metal-binding;Nucleotide-binding;Parkinsonism;Phosphoprotein;Polymorphism;Potassium;Potassiumtransport;Referenceproteome;Sodium;Sodium/potassiumtransport;Sodiumtransport;Transmembrane;Transmembranehelix;Transport	ATP biosynthetic process;ATP hydrolysis coupled proton transport;ATP metabolic process;biological regulation;biosynthetic process;cation homeostasis;cation transport;cell motility;cellular biosynthetic process;cellular cation homeostasis;cellular chemical homeostasis;cellular component movement;cellular homeostasis;cellular ion homeostasis;cellular metabolic process;cellular monovalent inorganic …	active transmembrane transporter activity;adenyl nucleotide binding;adenyl ribonucleotide binding;ATP binding;ATPase activity;ATPase activity, coupled;ATPase activity, coupled to movement of substances;ATPase activity, coupled to transmembrane movement of ions;ATPase activity, coupled to transmembrane movement of ions, phosphorylative mechanism;ATPase activity, coupled to transmembrane movement o…	cell part;cytoplasmic membrane-bounded vesicle;cytoplasmic part;cytoplasmic vesicle;endoplasmic reticulum;Golgi apparatus;hydrogen:potassium-exchanging ATPase complex;integral to membrane;integral to plasma membrane;intracellular membrane-bounded organelle;intracellular organelle;intracellular part;intrinsic to membrane;intrinsic to plasma membrane;macromolecular complex;melanosome;membrane part;…	18	18	18	11	15	13	10	13	16	7	13	14	23.8	113	F5H3A1;P05023;B7Z3U6;P05023-2;H7BXX5;E9PC51;B7Z2T0;F5H6J6;P13637;E9PC07;B7Z1Q9;F5H0J0;P50993;B1AKY9;F5GXJ7;B4DIQ8;H0Y7C1;P20648;Q13733;P54707-2;P54707;B4DHD7;Q5TC01;Q5TC02	F5H3A1;P05023;B7Z3U6;P05023-2;H7BXX5	Sodium/potassium-transporting ATPase subunit alpha-1	24.1125	24.3763	24.0169	23.3788	24.321	24.4459	23.0278	24.0536	24.6069
ATP1B3	7	Aldosterone-regulated sodium reabsorption;Bile secretion;Carbohydrate digestion and absorption;Cardiac muscle contraction;Endocrine and other factor-regulated calcium reabsorption;Gastric acid secretion;Mineral absorption;Pancreatic secretion;Protein digestion and absorption;Proximal tubule bicarbonate reclamation;Salivary secretion	Completeproteome;Disulfidebond;Glycoprotein;Iontransport;Membrane;Potassium;Potassiumtransport;Referenceproteome;Signal-anchor;Sodium;Sodium/potassiumtransport;Sodiumtransport;Transmembrane;Transmembranehelix;Transport	biological regulation;blood coagulation;cell migration;cell motility;cellular component movement;cellular process;coagulation;hemostasis;immune system process;leukocyte migration;locomotion;multicellular organismal process;regulation of biological quality;regulation of body fluid levels	active transmembrane transporter activity;ATPase activity;ATPase activity, coupled;ATPase activity, coupled to movement of substances;ATPase activity, coupled to transmembrane movement of ions;ATPase activity, coupled to transmembrane movement of ions, phosphorylative mechanism;ATPase activity, coupled to transmembrane movement of substances;catalytic activity;cation transmembrane transporter act…	cell part;cytoplasmic membrane-bounded vesicle;cytoplasmic part;cytoplasmic vesicle;intracellular membrane-bounded organelle;intracellular organelle;intracellular part;macromolecular complex;melanosome;membrane;membrane part;membrane-bounded organelle;membrane-bounded vesicle;organelle;pigment granule;plasma membrane part;protein complex;sodium:potassium-exchanging ATPase complex;vesicle	4	4	4	2	2	1	3	4	4	3	3	2	18.3	31.512	P54709;B7Z1N7;C9JA36;C9JXZ1;F8WBY4;H7C547;H7C4L9	P54709;B7Z1N7;C9JA36;C9JXZ1	Sodium/potassium-transporting ATPase subunit beta-3	20.1547	21.043	NaN	20.3104	21.2648	21.5712	19.6786	21.1921	21.5268
ATP2A2	7	Alzheimer's disease;Calcium signaling pathway;Pancreatic secretion	Acetylation;Alternativesplicing;ATP-binding;Calcium;Calciumtransport;Completeproteome;Diseasemutation;Endoplasmicreticulum;Epilepsy;Hydrolase;Iontransport;Isopeptidebond;Magnesium;Membrane;Metal-binding;Nitration;Nucleotide-binding;Phosphoprotein;Referenceproteome;Sarcoplasmicreticulum;Transmembrane;Transmembranehelix;Transport;Ublconjugation	anatomical structure development;ATP biosynthetic process;ATP metabolic process;biological adhesion;biological regulation;biosynthetic process;blood coagulation;calcium ion transport;cation transport;cell adhesion;cellular biosynthetic process;cellular metabolic process;cellular nitrogen compound biosynthetic process;cellular nitrogen compound metabolic process;cellular process;coagulation;develo…	active transmembrane transporter activity;adenyl nucleotide binding;adenyl ribonucleotide binding;ATP binding;ATPase activity;ATPase activity, coupled;ATPase activity, coupled to movement of substances;ATPase activity, coupled to transmembrane movement of ions;ATPase activity, coupled to transmembrane movement of ions, phosphorylative mechanism;ATPase activity, coupled to transmembrane movement o…	cell fraction;cell part;cytoplasmic part;endoplasmic reticulum membrane;endoplasmic reticulum part;insoluble fraction;integral to membrane;integral to plasma membrane;intracellular organelle part;intracellular part;intrinsic to membrane;intrinsic to plasma membrane;membrane;membrane fraction;membrane part;microsome;organelle membrane;organelle part;plasma membrane part;platelet dense tubular netw…	9	7	4	6	4	6	5	3	6	4	3	4	9.5	114.76	P16615;P16615-3;P16615-2;P16615-5;P16615-4;H7C5W9;H3BVB2	P16615;P16615-3;P16615-2;P16615-5;P16615-4;H7C5W9	Sarcoplasmic/endoplasmic reticulum calcium ATPase 2	22.5936	20.5016	20.9765	20.9832	NaN	21.458	21.6624	20.2199	20.7844
ATP2A3	8	Alzheimer's disease;Calcium signaling pathway;Pancreatic secretion	Acetylation;Alternativesplicing;ATP-binding;Calcium;Calciumtransport;Completeproteome;Directproteinsequencing;Endoplasmicreticulum;Hydrolase;Iontransport;Magnesium;Membrane;Metal-binding;Nucleotide-binding;Nucleus;Phosphoprotein;Polymorphism;Referenceproteome;Sarcoplasmicreticulum;Transmembrane;Transmembranehelix;Transport	ATP biosynthetic process;ATP metabolic process;biological regulation;biosynthetic process;blood coagulation;cellular biosynthetic process;cellular metabolic process;cellular nitrogen compound biosynthetic process;cellular nitrogen compound metabolic process;cellular process;coagulation;hemostasis;heterocycle biosynthetic process;heterocycle metabolic process;metabolic process;multicellular organi…	active transmembrane transporter activity;adenyl nucleotide binding;adenyl ribonucleotide binding;ATP binding;ATPase activity;ATPase activity, coupled;ATPase activity, coupled to movement of substances;ATPase activity, coupled to transmembrane movement of ions;ATPase activity, coupled to transmembrane movement of ions, phosphorylative mechanism;ATPase activity, coupled to transmembrane movement o…	cell part;cytoplasmic part;endoplasmic reticulum membrane;endoplasmic reticulum part;integral to membrane;intracellular organelle part;intracellular part;intrinsic to membrane;membrane;membrane part;nuclear membrane;nuclear part;organelle membrane;organelle part;platelet dense tubular network membrane;sarcoplasmic reticulum membrane	10	10	7	8	7	5	6	6	5	6	1	3	12.8	114.93	Q93084-5;Q93084-6;Q93084;Q93084-7;Q93084-3;Q93084-2;F8WC06;Q93084-4	Q93084-5;Q93084-6;Q93084;Q93084-7;Q93084-3;Q93084-2;F8WC06;Q93084-4	Sarcoplasmic/endoplasmic reticulum calcium ATPase 3	23.5539	20.3107	20.4822	21.6948	20.7149	20.9581	22.5575	NaN	20.5856
ATP2B1	7	Calcium signaling pathway;Pancreatic secretion;Salivary secretion	Alternativesplicing;ATP-binding;Calcium;Calciumtransport;Calmodulin-binding;Cellmembrane;Completeproteome;Hydrolase;Iontransport;Magnesium;Membrane;Metal-binding;Nucleotide-binding;Phosphoprotein;Polymorphism;Referenceproteome;Transmembrane;Transmembranehelix;Transport	ATP biosynthetic process;ATP metabolic process;biological regulation;biosynthetic process;blood coagulation;cellular biosynthetic process;cellular metabolic process;cellular nitrogen compound biosynthetic process;cellular nitrogen compound metabolic process;cellular process;coagulation;hemostasis;heterocycle biosynthetic process;heterocycle metabolic process;metabolic process;multicellular organi…	active transmembrane transporter activity;adenyl nucleotide binding;adenyl ribonucleotide binding;ATP binding;ATPase activity;ATPase activity, coupled;ATPase activity, coupled to movement of substances;ATPase activity, coupled to transmembrane movement of ions;ATPase activity, coupled to transmembrane movement of ions, phosphorylative mechanism;ATPase activity, coupled to transmembrane movement o…	cell part;integral to membrane;integral to plasma membrane;intrinsic to membrane;intrinsic to plasma membrane;membrane part;plasma membrane part	6	2	2	4	5	2	3	2	5	1	0	5	7.6	138.75	P20020;P20020-4;P20020-3;P20020-6;P20020-2;P20020-5;E7ERY9	P20020;P20020-4;P20020-3;P20020-6;P20020-2;P20020-5;E7ERY9	Plasma membrane calcium-transporting ATPase 1	NaN	18.1481	NaN	NaN	NaN	19.2767	NaN	NaN	19.9451
ATP2B4;ATP2B3	27	Calcium signaling pathway;Pancreatic secretion;Salivary secretion	3D-structure;Alternativesplicing;ATP-binding;Calcium;Calciumtransport;Calmodulin-binding;Cellmembrane;Completeproteome;Directproteinsequencing;Hydrolase;Iontransport;Magnesium;Membrane;Metal-binding;Nucleotide-binding;Phosphoprotein;Polymorphism;Referenceproteome;Transmembrane;Transmembranehelix;Transport	ATP biosynthetic process;ATP metabolic process;biological regulation;biosynthetic process;blood coagulation;calcium ion homeostasis;cation homeostasis;cellular biosynthetic process;cellular calcium ion homeostasis;cellular cation homeostasis;cellular chemical homeostasis;cellular divalent inorganic cation homeostasis;cellular homeostasis;cellular ion homeostasis;cellular metabolic process;cellula…	active transmembrane transporter activity;adenyl nucleotide binding;adenyl ribonucleotide binding;ATP binding;ATPase activity;ATPase activity, coupled;ATPase activity, coupled to movement of substances;ATPase activity, coupled to transmembrane movement of ions;ATPase activity, coupled to transmembrane movement of ions, phosphorylative mechanism;ATPase activity, coupled to transmembrane movement o…	cell part;integral to membrane;integral to plasma membrane;intrinsic to membrane;intrinsic to plasma membrane;membrane;membrane part;plasma membrane;plasma membrane part	6	6	2	4	4	2	4	3	4	2	1	4	7.9	137.92	P23634;P23634-8;P23634-6;P23634-7;P23634-2;P23634-3;P23634-4;P23634-5;Q16720;Q16720-4;Q16720-2;Q16720-5;Q16720-3;Q16720-6;Q16720-7;Q16720-8;Q01814;Q01814-5;Q01814-8;E7EME2;Q01814-2;Q01814-6;Q01814-3;F5H7F7;Q01814-7;Q01814-4;H0Y7S3	P23634;P23634-8;P23634-6;P23634-7;P23634-2;P23634-3;P23634-4;P23634-5;Q16720;Q16720-4;Q16720-2;Q16720-5;Q16720-3;Q16720-6;Q16720-7;Q16720-8	Plasma membrane calcium-transporting ATPase 4;Plasma membrane calcium-transporting ATPase 3	21.1708	20.1513	19.8274	20.2296	20.5833	20.4204	20.1635	NaN	21.2588
ATP5A1	2	Alzheimer's disease;Huntington's disease;Oxidative phosphorylation;Parkinson's disease	Acetylation;ATP-binding;ATPsynthesis;Cellmembrane;CF(1);Completeproteome;Directproteinsequencing;Hydrogeniontransport;Iontransport;Membrane;Mitochondrion;Mitochondrioninnermembrane;Nucleotide-binding;Phosphoprotein;Polymorphism;Pyrrolidonecarboxylicacid;Referenceproteome;Transitpeptide;Transport	ATP biosynthetic process;ATP hydrolysis coupled proton transport;ATP metabolic process;ATP synthesis coupled proton transport;biological regulation;biosynthetic process;cation transport;cellular biosynthetic process;cellular metabolic process;cellular nitrogen compound biosynthetic process;cellular nitrogen compound metabolic process;cellular process;developmental process;electron transport chain…	active transmembrane transporter activity;adenyl nucleotide binding;adenyl ribonucleotide binding;ATP binding;ATPase activity;ATPase activity, coupled;ATPase activity, coupled to movement of substances;ATPase activity, coupled to transmembrane movement of ions;ATPase activity, coupled to transmembrane movement of substances;binding;catalytic activity;cation transmembrane transporter activity;cati…	cell part;cytoplasmic part;intracellular organelle lumen;intracellular organelle part;intracellular part;membrane;membrane-enclosed lumen;mitochondrial matrix;mitochondrial part;organelle lumen;organelle part;plasma membrane	24	24	24	18	22	21	19	21	20	18	20	20	50.5	59.75	P25705;A8K092	P25705;A8K092	ATP synthase subunit alpha, mitochondrial;ATP synthase subunit alpha	28.3321	28.2937	28.1791	28.175	27.5184	28.5708	28.0742	27.9595	28.1079
ATP5B	7	Alzheimer's disease;Huntington's disease;Oxidative phosphorylation;Parkinson's disease	Acetylation;ATP-binding;ATPsynthesis;CF(1);Completeproteome;Directproteinsequencing;Hydrogeniontransport;Hydrolase;Iontransport;Membrane;Mitochondrion;Mitochondrioninnermembrane;Nucleotide-binding;Phosphoprotein;Polymorphism;Referenceproteome;Transitpeptide;Transport	anatomical structure formation involved in morphogenesis;angiogenesis;ATP biosynthetic process;ATP hydrolysis coupled proton transport;ATP metabolic process;ATP synthesis coupled proton transport;biological regulation;biosynthetic process;cation homeostasis;cation transport;cellular biosynthetic process;cellular cation homeostasis;cellular chemical homeostasis;cellular homeostasis;cellular ion ho…	active transmembrane transporter activity;adenyl nucleotide binding;adenyl ribonucleotide binding;ATP binding;ATPase activity;ATPase activity, coupled;ATPase activity, coupled to movement of substances;ATPase activity, coupled to transmembrane movement of ions;ATPase activity, coupled to transmembrane movement of ions, phosphorylative mechanism;ATPase activity, coupled to transmembrane movement o…	cell part;cell surface;cytoplasmic part;intracellular non-membrane-bounded organelle;intracellular organelle;intracellular organelle part;intracellular part;macromolecular complex;membrane;membrane part;mitochondrial membrane part;mitochondrial nucleoid;mitochondrial part;mitochondrial proton-transporting ATP synthase, catalytic core;non-membrane-bounded organelle;nucleoid;organelle;organelle par…	25	25	25	21	23	24	23	22	23	19	20	17	68.1	56.559	P06576;F8VPV9;H0YH81;F8W079;F8W0P7;H0YI37;F8VQY0	P06576;F8VPV9;H0YH81;F8W079	ATP synthase subunit beta, mitochondrial;ATP synthase subunit beta	28.1819	28.1443	28.0847	28.6958	27.7877	28.7882	28.4384	27.7081	28.1216
ATP5C1	3	Alzheimer's disease;Huntington's disease;Oxidative phosphorylation;Parkinson's disease	Acetylation;Alternativesplicing;ATPsynthesis;CF(1);Completeproteome;Directproteinsequencing;Hydrogeniontransport;Iontransport;Membrane;Mitochondrion;Mitochondrioninnermembrane;Phosphoprotein;Referenceproteome;Transitpeptide;Transport	ATP biosynthetic process;ATP metabolic process;ATP synthesis coupled proton transport;biosynthetic process;cation transport;cellular biosynthetic process;cellular metabolic process;cellular nitrogen compound biosynthetic process;cellular nitrogen compound metabolic process;cellular process;electron transport chain;energy coupled proton transport, down electrochemical gradient;establishment of loc…	active transmembrane transporter activity;ATPase activity;ATPase activity, coupled;ATPase activity, coupled to movement of substances;ATPase activity, coupled to transmembrane movement of ions;ATPase activity, coupled to transmembrane movement of substances;catalytic activity;cation transmembrane transporter activity;cation-transporting ATPase activity;hydrogen ion transmembrane transporter activ…	cell part;cytoplasmic part;intracellular organelle lumen;intracellular organelle part;intracellular part;macromolecular complex;membrane part;membrane-enclosed lumen;mitochondrial matrix;mitochondrial membrane part;mitochondrial part;mitochondrial proton-transporting ATP synthase complex, catalytic core F(1);organelle lumen;organelle part;protein complex;proton-transporting ATP synthase complex, …	5	5	5	4	5	5	4	4	4	4	4	4	18.5	32.996	P36542;P36542-2;B4DL14	P36542;P36542-2;B4DL14	ATP synthase subunit gamma, mitochondrial;ATP synthase gamma chain	23.0277	22.9516	22.5971	22.5644	22.425	23.4034	22.791	22.9338	23.1985
ATP5D	1	Alzheimer's disease;Huntington's disease;Oxidative phosphorylation;Parkinson's disease	ATPsynthesis;CF(1);Completeproteome;Directproteinsequencing;Hydrogeniontransport;Iontransport;Isopeptidebond;Membrane;Mitochondrion;Mitochondrioninnermembrane;Referenceproteome;Transitpeptide;Transport;Ublconjugation	ATP biosynthetic process;ATP metabolic process;ATP synthesis coupled proton transport;biosynthetic process;cation transport;cellular biosynthetic process;cellular metabolic process;cellular nitrogen compound biosynthetic process;cellular nitrogen compound metabolic process;cellular process;electron transport chain;energy coupled proton transport, down electrochemical gradient;establishment of loc…	active transmembrane transporter activity;ATPase activity;ATPase activity, coupled;ATPase activity, coupled to movement of substances;ATPase activity, coupled to transmembrane movement of ions;ATPase activity, coupled to transmembrane movement of substances;catalytic activity;cation transmembrane transporter activity;cation-transporting ATPase activity;hydrogen ion transmembrane transporter activ…	cell part;cytoplasmic part;intracellular organelle lumen;intracellular organelle part;intracellular part;macromolecular complex;membrane part;membrane-enclosed lumen;mitochondrial matrix;mitochondrial membrane part;mitochondrial part;mitochondrial proton-transporting ATP synthase complex, catalytic core F(1);organelle lumen;organelle part;protein complex;proton-transporting ATP synthase complex, …	3	3	3	0	1	2	0	1	1	1	0	1	22.6	17.49	P30049	P30049	ATP synthase subunit delta, mitochondrial	NaN	NaN	22.2296	NaN	NaN	NaN	NaN	NaN	NaN
ATP5F1	2	Alzheimer's disease;Huntington's disease;Oxidative phosphorylation;Parkinson's disease	Acetylation;CF(0);Completeproteome;Hydrogeniontransport;Iontransport;Membrane;Mitochondrion;Mitochondrioninnermembrane;Polymorphism;Referenceproteome;Transitpeptide;Transport	ATP biosynthetic process;ATP catabolic process;ATP metabolic process;ATP synthesis coupled proton transport;biosynthetic process;catabolic process;cation transport;cellular biosynthetic process;cellular catabolic process;cellular metabolic process;cellular nitrogen compound biosynthetic process;cellular nitrogen compound catabolic process;cellular nitrogen compound metabolic process;cellular proc…	binding;cation transmembrane transporter activity;hydrogen ion transmembrane transporter activity;hydrogen ion transporting ATP synthase activity, rotational mechanism;inorganic cation transmembrane transporter activity;ion transmembrane transporter activity;monovalent inorganic cation transmembrane transporter activity;protein binding;substrate-specific transmembrane transporter activity;substra…	cell part;cytoplasmic part;intracellular organelle lumen;intracellular organelle part;intracellular part;macromolecular complex;membrane part;membrane-enclosed lumen;mitochondrial matrix;mitochondrial membrane part;mitochondrial part;mitochondrial proton-transporting ATP synthase complex, coupling factor F(o);organelle lumen;organelle part;protein complex;proton-transporting ATP synthase complex,…	5	5	5	4	3	3	4	2	5	2	3	4	22.7	28.908	P24539;Q5QNZ2	P24539;Q5QNZ2	ATP synthase subunit b, mitochondrial	23.366	22.8749	22.1559	22.2283	21.7433	23.7546	22.9314	22.8844	23.2764
ATP5H	3	Alzheimer's disease;Huntington's disease;Oxidative phosphorylation;Parkinson's disease	Acetylation;Alternativesplicing;CF(0);Completeproteome;Directproteinsequencing;Hydrogeniontransport;Iontransport;Membrane;Mitochondrion;Mitochondrioninnermembrane;Referenceproteome;Transport	ATP biosynthetic process;ATP catabolic process;ATP metabolic process;ATP synthesis coupled proton transport;biosynthetic process;catabolic process;cation transport;cellular biosynthetic process;cellular catabolic process;cellular metabolic process;cellular nitrogen compound biosynthetic process;cellular nitrogen compound catabolic process;cellular nitrogen compound metabolic process;cellular proc…	cation transmembrane transporter activity;hydrogen ion transmembrane transporter activity;inorganic cation transmembrane transporter activity;ion transmembrane transporter activity;monovalent inorganic cation transmembrane transporter activity;substrate-specific transmembrane transporter activity;substrate-specific transporter activity;transmembrane transporter activity;transporter activity	cell part;cytoplasmic part;intracellular organelle part;intracellular part;macromolecular complex;membrane part;mitochondrial membrane part;mitochondrial part;mitochondrial proton-transporting ATP synthase complex, coupling factor F(o);organelle part;protein complex;proton-transporting ATP synthase complex, coupling factor F(o);proton-transporting two-sector ATPase complex, proton-transporting do…	5	5	5	2	2	2	2	2	3	2	2	2	52.2	18.491	O75947;O75947-2;F5H608	O75947;O75947-2;F5H608	ATP synthase subunit d, mitochondrial	21.2109	23.3489	22.0846	22.4345	19.7181	22.1608	22.8633	22.8288	21.946
ATP5I	1	Oxidative phosphorylation	ATPsynthesis;CF(0);Completeproteome;Directproteinsequencing;Hydrogeniontransport;Iontransport;Membrane;Mitochondrion;Mitochondrioninnermembrane;Phosphoprotein;Referenceproteome;Transport	ATP biosynthetic process;ATP catabolic process;ATP metabolic process;ATP synthesis coupled proton transport;biosynthetic process;catabolic process;cation transport;cellular biosynthetic process;cellular catabolic process;cellular metabolic process;cellular nitrogen compound biosynthetic process;cellular nitrogen compound catabolic process;cellular nitrogen compound metabolic process;cellular proc…	cation transmembrane transporter activity;hydrogen ion transmembrane transporter activity;inorganic cation transmembrane transporter activity;ion transmembrane transporter activity;monovalent inorganic cation transmembrane transporter activity;substrate-specific transmembrane transporter activity;substrate-specific transporter activity;transmembrane transporter activity;transporter activity		3	3	3	2	3	2	3	2	2	2	2	2	50.7	7.9331	P56385	P56385	ATP synthase subunit e, mitochondrial	23.0825	22.8651	21.5655	22.8528	21.9351	22.5276	23.636	23.0844	22.5854
ATP5J	2	Alzheimer's disease;Huntington's disease;Oxidative phosphorylation;Parkinson's disease	Acetylation;CF(0);Completeproteome;Directproteinsequencing;Hydrogeniontransport;Iontransport;Membrane;Mitochondrion;Mitochondrioninnermembrane;Referenceproteome;Transitpeptide;Transport	ATP biosynthetic process;ATP catabolic process;ATP metabolic process;ATP synthesis coupled proton transport;biosynthetic process;catabolic process;cation transport;cellular biosynthetic process;cellular catabolic process;cellular metabolic process;cellular nitrogen compound biosynthetic process;cellular nitrogen compound catabolic process;cellular nitrogen compound metabolic process;cellular proc…	cation transmembrane transporter activity;hydrogen ion transmembrane transporter activity;inorganic cation transmembrane transporter activity;ion transmembrane transporter activity;monovalent inorganic cation transmembrane transporter activity;substrate-specific transmembrane transporter activity;substrate-specific transporter activity;transmembrane transporter activity;transporter activity	cell part;cytoplasmic part;intracellular organelle part;intracellular part;macromolecular complex;membrane part;mitochondrial membrane part;mitochondrial part;mitochondrial proton-transporting ATP synthase complex, coupling factor F(o);organelle part;protein complex;proton-transporting ATP synthase complex, coupling factor F(o);proton-transporting two-sector ATPase complex, proton-transporting do…	5	5	5	3	1	3	4	2	4	3	2	3	45.4	12.587	P18859;A8MUH2	P18859;A8MUH2	ATP synthase-coupling factor 6, mitochondrial	22.1045	NaN	20.7579	21.8324	21.0242	21.0473	22.1683	21.811	21.1598
ATP5L	2	Oxidative phosphorylation	Acetylation;ATPsynthesis;CF(0);Completeproteome;Hydrogeniontransport;Iontransport;Membrane;Mitochondrion;Mitochondrioninnermembrane;Referenceproteome;Transport	ATP biosynthetic process;ATP catabolic process;ATP metabolic process;ATP synthesis coupled proton transport;biosynthetic process;catabolic process;cation transport;cellular biosynthetic process;cellular catabolic process;cellular metabolic process;cellular nitrogen compound biosynthetic process;cellular nitrogen compound catabolic process;cellular nitrogen compound metabolic process;cellular proc…	cation transmembrane transporter activity;hydrogen ion transmembrane transporter activity;inorganic cation transmembrane transporter activity;ion transmembrane transporter activity;monovalent inorganic cation transmembrane transporter activity;substrate-specific transmembrane transporter activity;substrate-specific transporter activity;transmembrane transporter activity;transporter activity	cell part;cytoplasmic part;intracellular organelle part;intracellular part;macromolecular complex;membrane part;mitochondrial membrane part;mitochondrial part;mitochondrial proton-transporting ATP synthase complex, coupling factor F(o);organelle part;protein complex;proton-transporting ATP synthase complex, coupling factor F(o);proton-transporting two-sector ATPase complex, proton-transporting do…	5	5	5	2	2	3	3	2	3	3	3	2	45.6	11.428	O75964;E9PN17	O75964;E9PN17	ATP synthase subunit g, mitochondrial	22.3806	NaN	21.6526	22.4024	21.5092	23.0505	22.3583	22.1012	22.3082
ATP5O	4	Alzheimer's disease;Huntington's disease;Oxidative phosphorylation;Parkinson's disease	Acetylation;ATPsynthesis;Completeproteome;Directproteinsequencing;Hydrogeniontransport;Iontransport;Membrane;Mitochondrion;Mitochondrioninnermembrane;Polymorphism;Referenceproteome;Transitpeptide;Transport	ATP biosynthetic process;ATP catabolic process;ATP metabolic process;ATP synthesis coupled proton transport;biosynthetic process;catabolic process;cation transport;cellular biosynthetic process;cellular catabolic process;cellular metabolic process;cellular nitrogen compound biosynthetic process;cellular nitrogen compound catabolic process;cellular nitrogen compound metabolic process;cellular proc…	binding;cation transmembrane transporter activity;drug binding;hydrogen ion transmembrane transporter activity;hydrogen ion transporting ATP synthase activity, rotational mechanism;inorganic cation transmembrane transporter activity;ion transmembrane transporter activity;monovalent inorganic cation transmembrane transporter activity;substrate-specific transmembrane transporter activity;substrate-…	cell part;cytoplasmic part;intracellular organelle part;intracellular part;macromolecular complex;membrane;membrane part;mitochondrial membrane part;mitochondrial part;mitochondrial proton-transporting ATP synthase complex;organelle part;plasma membrane;protein complex;proton-transporting ATP synthase complex;proton-transporting two-sector ATPase complex	9	9	9	5	8	8	7	6	6	5	6	5	53.5	23.277	P48047;H7C0C1;H7C068;H7C086	P48047	ATP synthase subunit O, mitochondrial	24.8022	23.3205	24.6077	23.8274	23.6123	24.2391	23.7774	24.0463	24.1678
ATP6V0A2	2	Collecting duct acid secretion;Epithelial cell signaling in Helicobacter pylori infection;ko05152;Lysosome;Oxidative phosphorylation;Phagosome;Rheumatoid arthritis;Vibrio cholerae infection	Acetylation;Cellmembrane;Completeproteome;Endosome;Hydrogeniontransport;Iontransport;Membrane;Phosphoprotein;Polymorphism;Referenceproteome;Transmembrane;Transmembranehelix;Transport	ATP hydrolysis coupled proton transport;biological regulation;cation homeostasis;cation transport;cell surface receptor linked signaling pathway;cellular cation homeostasis;cellular chemical homeostasis;cellular homeostasis;cellular ion homeostasis;cellular iron ion homeostasis;cellular metal ion homeostasis;cellular process;cellular response to chemical stimulus;cellular response to endogenous s…	binding;cation transmembrane transporter activity;hydrogen ion transmembrane transporter activity;inorganic cation transmembrane transporter activity;ion transmembrane transporter activity;monovalent inorganic cation transmembrane transporter activity;protein binding;substrate-specific transmembrane transporter activity;substrate-specific transporter activity;transmembrane transporter activity;tr…	cell part;cytoplasm;cytoplasmic part;endosomal part;endosome membrane;integral to membrane;intracellular organelle part;intracellular part;intrinsic to membrane;macromolecular complex;membrane;membrane part;organelle membrane;organelle part;plasma membrane;protein complex;proton-transporting two-sector ATPase complex, proton-transporting domain	2	2	2	0	2	1	1	1	1	0	0	1	3.4	98.081	Q9Y487;Q8TBM3	Q9Y487;Q8TBM3	V-type proton ATPase 116 kDa subunit a isoform 2	NaN	20.0144	NaN	NaN	NaN	NaN	NaN	NaN	NaN
ATP6V0D1	9	Collecting duct acid secretion;Epithelial cell signaling in Helicobacter pylori infection;ko05152;Lysosome;Oxidative phosphorylation;Phagosome;Rheumatoid arthritis;Vibrio cholerae infection	Completeproteome;Hydrogeniontransport;Iontransport;Phosphoprotein;Referenceproteome;Transport	activation of signaling protein activity involved in unfolded protein response;ATP hydrolysis coupled proton transport;biological regulation;cation homeostasis;cation transport;cell surface receptor linked signaling pathway;cellular cation homeostasis;cellular chemical homeostasis;cellular homeostasis;cellular ion homeostasis;cellular iron ion homeostasis;cellular metal ion homeostasis;cellular p…	binding;cation transmembrane transporter activity;hydrogen ion transmembrane transporter activity;inorganic cation transmembrane transporter activity;ion transmembrane transporter activity;monovalent inorganic cation transmembrane transporter activity;protein binding;substrate-specific transmembrane transporter activity;substrate-specific transporter activity;transmembrane transporter activity;tr…	cell part;clathrin coated vesicle membrane;clathrin sculpted glutamate transport vesicle membrane;coated vesicle membrane;cytoplasmic part;cytoplasmic vesicle membrane;cytoplasmic vesicle part;endosomal part;endosome membrane;intracellular organelle part;intracellular part;macromolecular complex;membrane;membrane part;organelle membrane;organelle part;protein complex;proton-transporting two-secto…	7	7	7	2	3	2	1	2	5	2	3	4	21.4	44.659	F5GYQ1;P61421;F8WEN9;H3BQJ1;H3BSG7;H3BQB4;H3BPS0;H3BTB4;H3BMN7	F5GYQ1;P61421;F8WEN9	V-type proton ATPase subunit d 1	20.4881	20.3582	21.4549	NaN	20.5408	22.0408	20.6378	20.6141	21.4451
ATP6V1A	5	Collecting duct acid secretion;Epithelial cell signaling in Helicobacter pylori infection;Oxidative phosphorylation;Phagosome;Rheumatoid arthritis;Vibrio cholerae infection	ATP-binding;Completeproteome;Hydrogeniontransport;Hydrolase;Iontransport;Nucleotide-binding;Phosphoprotein;Referenceproteome;Transport	ATP hydrolysis coupled proton transport;biological regulation;cation homeostasis;cation transport;cell surface receptor linked signaling pathway;cellular cation homeostasis;cellular chemical homeostasis;cellular homeostasis;cellular ion homeostasis;cellular iron ion homeostasis;cellular metal ion homeostasis;cellular process;cellular response to chemical stimulus;cellular response to endogenous s…	active transmembrane transporter activity;adenyl nucleotide binding;adenyl ribonucleotide binding;ATP binding;ATPase activity;ATPase activity, coupled;ATPase activity, coupled to movement of substances;ATPase activity, coupled to transmembrane movement of ions;ATPase activity, coupled to transmembrane movement of substances;binding;catalytic activity;cation transmembrane transporter activity;cati…	cell part;cytoplasmic part;cytosol;integral to membrane;integral to plasma membrane;intracellular part;intrinsic to membrane;intrinsic to plasma membrane;macromolecular complex;membrane part;plasma membrane part;protein complex;proton-transporting two-sector ATPase complex;proton-transporting two-sector ATPase complex, catalytic domain;proton-transporting V-type ATPase, V1 domain	20	20	20	10	14	16	9	13	15	8	13	12	44.7	68.303	P38606;B7Z1R5;B7Z2V6;C9JVW8;C9JA17	P38606;B7Z1R5;B7Z2V6	V-type proton ATPase catalytic subunit A	24.1668	24.3068	25.4403	24.1653	24.108	25.0229	24.3404	24.3455	25.4368
ATP6V1B2	12	Collecting duct acid secretion;Epithelial cell signaling in Helicobacter pylori infection;Oxidative phosphorylation;Phagosome;Rheumatoid arthritis;Vibrio cholerae infection	Completeproteome;Deafness;Diseasemutation;Hydrogeniontransport;Hydrolase;Iontransport;Membrane;Phosphoprotein;Polymorphism;Referenceproteome;Transport	anatomical structure morphogenesis;ATP hydrolysis coupled proton transport;biological regulation;calcium ion homeostasis;cation homeostasis;cation transport;cell surface receptor linked signaling pathway;cellular cation homeostasis;cellular chemical homeostasis;cellular homeostasis;cellular ion homeostasis;cellular iron ion homeostasis;cellular metal ion homeostasis;cellular process;cellular resp…	active transmembrane transporter activity;adenyl nucleotide binding;adenyl ribonucleotide binding;ATP binding;ATPase activity;ATPase activity, coupled;ATPase activity, coupled to movement of substances;ATPase activity, coupled to transmembrane movement of ions;ATPase activity, coupled to transmembrane movement of substances;binding;catalytic activity;cation transmembrane transporter activity;cati…	apical plasma membrane;basolateral plasma membrane;cell part;cell projection;cytoplasmic membrane-bounded vesicle;cytoplasmic part;cytoplasmic vesicle;cytosol;endomembrane system;Golgi apparatus;intracellular membrane-bounded organelle;intracellular organelle;intracellular organelle part;intracellular part;lateral plasma membrane;macromolecular complex;melanosome;membrane;membrane part;membrane-b…	12	12	12	8	11	9	8	10	11	5	10	11	34.1	56.5	P21281;B4DFM5;B4DQI9;H0YC04;P15313;C9JL73;B4DWH7;E5RGH6;C9JNS9;C9J5E3;H0YAT8;H0YC45	P21281;B4DFM5;B4DQI9	V-type proton ATPase subunit B, brain isoform	23.2754	23.5781	24.02	23.1671	23.0005	24.1943	23.4871	23.0106	24.118
ATP6V1C1	3	Collecting duct acid secretion;Epithelial cell signaling in Helicobacter pylori infection;Oxidative phosphorylation;Phagosome;Rheumatoid arthritis;Vibrio cholerae infection	Acetylation;Completeproteome;Directproteinsequencing;Hydrogeniontransport;Iontransport;Referenceproteome;Transport	ATP hydrolysis coupled proton transport;biological regulation;cation homeostasis;cation transport;cell surface receptor linked signaling pathway;cellular cation homeostasis;cellular chemical homeostasis;cellular homeostasis;cellular ion homeostasis;cellular iron ion homeostasis;cellular metal ion homeostasis;cellular process;cellular response to chemical stimulus;cellular response to endogenous s…	active transmembrane transporter activity;ATPase activity;ATPase activity, coupled;ATPase activity, coupled to movement of substances;ATPase activity, coupled to transmembrane movement of ions;ATPase activity, coupled to transmembrane movement of substances;binding;catalytic activity;cation transmembrane transporter activity;cation-transporting ATPase activity;hydrogen ion transmembrane transport…	cell part;cytoplasmic part;cytosol;intracellular part;macromolecular complex;membrane;membrane part;plasma membrane;protein complex;proton-transporting two-sector ATPase complex, catalytic domain;proton-transporting V-type ATPase, V1 domain	4	4	4	1	1	3	1	1	2	1	1	2	10.5	43.941	P21283;A8MQ60;E7EV59	P21283;A8MQ60;E7EV59	V-type proton ATPase subunit C 1	NaN	NaN	20.6637	NaN	NaN	20.6252	NaN	NaN	NaN
ATP6V1D	8	Collecting duct acid secretion;Epithelial cell signaling in Helicobacter pylori infection;Oxidative phosphorylation;Phagosome;Rheumatoid arthritis;Vibrio cholerae infection	Completeproteome;Hydrogeniontransport;Iontransport;Referenceproteome;Transport	ATP hydrolysis coupled proton transport;biological regulation;cation homeostasis;cation transport;cell surface receptor linked signaling pathway;cellular cation homeostasis;cellular chemical homeostasis;cellular homeostasis;cellular ion homeostasis;cellular iron ion homeostasis;cellular metal ion homeostasis;cellular process;cellular response to chemical stimulus;cellular response to endogenous s…	active transmembrane transporter activity;ATPase activity;ATPase activity, coupled;ATPase activity, coupled to movement of substances;ATPase activity, coupled to transmembrane movement of ions;ATPase activity, coupled to transmembrane movement of substances;binding;catalytic activity;cation transmembrane transporter activity;cation-transporting ATPase activity;hydrogen ion transmembrane transport…	cell part;cytoplasmic part;cytosol;intracellular organelle part;intracellular part;macromolecular complex;membrane part;organelle part;protein complex;proton-transporting two-sector ATPase complex;proton-transporting two-sector ATPase complex, catalytic domain;proton-transporting V-type ATPase complex;vacuolar part;vacuolar proton-transporting V-type ATPase complex	2	2	2	0	0	1	0	1	1	1	1	2	9.3	28.262	Q9Y5K8;G3V559;G3V2S6;G3V2V6;H0YJS0;G3V3T8;G3V341;H0YJ55	Q9Y5K8;G3V559;G3V2S6;G3V2V6;H0YJS0;G3V3T8;G3V341;H0YJ55	V-type proton ATPase subunit D	NaN	NaN	NaN	NaN	NaN	NaN	NaN	NaN	19.9334
ATP6V1E1	5	Collecting duct acid secretion;Epithelial cell signaling in Helicobacter pylori infection;Oxidative phosphorylation;Phagosome;Rheumatoid arthritis;Vibrio cholerae infection	Acetylation;Completeproteome;Directproteinsequencing;Hydrogeniontransport;Hydrolase;Iontransport;Phosphoprotein;Polymorphism;Referenceproteome;Transport	ATP hydrolysis coupled proton transport;biological regulation;cation homeostasis;cation transport;cell surface receptor linked signaling pathway;cellular cation homeostasis;cellular chemical homeostasis;cellular homeostasis;cellular ion homeostasis;cellular iron ion homeostasis;cellular metal ion homeostasis;cellular process;cellular response to chemical stimulus;cellular response to endogenous s…	active transmembrane transporter activity;ATPase activity;ATPase activity, coupled;ATPase activity, coupled to movement of substances;ATPase activity, coupled to transmembrane movement of ions;ATPase activity, coupled to transmembrane movement of substances;binding;catalytic activity;cation transmembrane transporter activity;cation-transporting ATPase activity;hydrogen ion transmembrane transport…	apical plasma membrane;cell part;cytoplasmic part;cytosol;endosome;intracellular membrane-bounded organelle;intracellular organelle;intracellular part;macromolecular complex;membrane part;membrane-bounded organelle;organelle;plasma membrane part;protein complex;proton-transporting two-sector ATPase complex, catalytic domain	8	8	8	3	8	7	2	3	3	2	2	2	33.6	26.145	P36543;P36543-2;A8MUN4;C9J8H1;Q96A05	P36543;P36543-2;A8MUN4;C9J8H1	V-type proton ATPase subunit E 1	21.3521	21.8261	22.3095	20.7569	21.2856	21.9887	20.7307	21.597	22.7982
ATP6V1F	2	Collecting duct acid secretion;Epithelial cell signaling in Helicobacter pylori infection;Oxidative phosphorylation;Phagosome;Rheumatoid arthritis;Vibrio cholerae infection	Completeproteome;Hydrogeniontransport;Iontransport;Polymorphism;Referenceproteome;Transport	ATP hydrolysis coupled proton transport;biological regulation;cation homeostasis;cation transport;cell surface receptor linked signaling pathway;cellular cation homeostasis;cellular chemical homeostasis;cellular homeostasis;cellular ion homeostasis;cellular iron ion homeostasis;cellular metal ion homeostasis;cellular process;cellular response to chemical stimulus;cellular response to endogenous s…	active transmembrane transporter activity;ATPase activity;ATPase activity, coupled;ATPase activity, coupled to movement of substances;ATPase activity, coupled to transmembrane movement of ions;ATPase activity, coupled to transmembrane movement of substances;ATPase activity, uncoupled;binding;catalytic activity;cation transmembrane transporter activity;cation-transporting ATPase activity;hydrogen …	cell fraction;cell part;cytoplasmic part;cytosol;insoluble fraction;intracellular organelle part;intracellular part;macromolecular complex;membrane fraction;membrane part;organelle part;protein complex;proton-transporting two-sector ATPase complex;proton-transporting two-sector ATPase complex, catalytic domain;proton-transporting V-type ATPase complex;proton-transporting V-type ATPase, V1 domain;…	2	2	2	0	1	2	0	0	0	0	1	0	14.3	16.401	C9J2K4;Q16864	C9J2K4;Q16864	V-type proton ATPase subunit F	NaN	NaN	20.0912	NaN	NaN	NaN	NaN	NaN	NaN
ATP6V1G1	6	Collecting duct acid secretion;Epithelial cell signaling in Helicobacter pylori infection;Oxidative phosphorylation;Phagosome;Rheumatoid arthritis;Vibrio cholerae infection	Acetylation;Completeproteome;Directproteinsequencing;Hydrogeniontransport;Iontransport;Referenceproteome;Transport	biological regulation;cation homeostasis;cation transport;cell surface receptor linked signaling pathway;cellular cation homeostasis;cellular chemical homeostasis;cellular homeostasis;cellular ion homeostasis;cellular iron ion homeostasis;cellular metal ion homeostasis;cellular process;cellular response to chemical stimulus;cellular response to endogenous stimulus;cellular response to hormone sti…	ATPase binding;binding;catalytic activity;enzyme binding;hydrolase activity;hydrolase activity, acting on acid anhydrides;hydrolase activity, acting on acid anhydrides, catalyzing transmembrane movement of substances;protein binding;transmembrane transporter activity;transporter activity	cell part;cytoplasmic membrane-bounded vesicle;cytoplasmic part;cytoplasmic vesicle;cytosol;intracellular membrane-bounded organelle;intracellular organelle;intracellular organelle part;intracellular part;macromolecular complex;melanosome;membrane;membrane part;membrane-bounded organelle;membrane-bounded vesicle;organelle;organelle part;pigment granule;plasma membrane;protein complex;proton-trans…	3	3	3	1	2	3	2	2	2	1	1	0	29.7	13.757	O75348;C9JRT2;O95670;F2Z307;Q5HYU8;C9JYK3	O75348	V-type proton ATPase subunit G 1	NaN	21.9084	22.9947	20.855	20.9291	21.4394	NaN	NaN	NaN
ATP6V1H	10	Epithelial cell signaling in Helicobacter pylori infection;ko05152;Lysosome;Oxidative phosphorylation;Phagosome;Rheumatoid arthritis;Vibrio cholerae infection	Alternativesplicing;Completeproteome;Host-virusinteraction;Hydrogeniontransport;Iontransport;Phosphoprotein;Referenceproteome;Transport	ATP hydrolysis coupled proton transport;biological regulation;cation homeostasis;cation transport;cell surface receptor linked signaling pathway;cellular cation homeostasis;cellular chemical homeostasis;cellular component organization;cellular component organization or biogenesis;cellular homeostasis;cellular ion homeostasis;cellular iron ion homeostasis;cellular membrane organization;cellular me…	active transmembrane transporter activity;ATPase activity;ATPase activity, coupled;ATPase activity, coupled to movement of substances;ATPase activity, coupled to transmembrane movement of ions;ATPase activity, coupled to transmembrane movement of substances;binding;catalytic activity;cation transmembrane transporter activity;cation-transporting ATPase activity;enzyme regulator activity;hydrogen i…	cell part;cytoplasmic part;cytosol;intracellular organelle part;intracellular part;macromolecular complex;membrane;membrane part;organelle part;plasma membrane;protein complex;proton-transporting two-sector ATPase complex, catalytic domain;proton-transporting V-type ATPase, V1 domain;vacuolar part;vacuolar proton-transporting V-type ATPase, V1 domain	5	5	5	2	3	3	1	3	5	4	3	4	15.5	55.882	Q9UI12;Q9UI12-2;E9PGE6;G3V126;E5RFZ9;E5RG90;E5RHH0;E5RG49;E5RJG1;E5RK31	Q9UI12;Q9UI12-2;E9PGE6;G3V126	V-type proton ATPase subunit H	21.2037	21.0154	22.1894	NaN	21.1866	21.8562	21.2056	21.1631	22.2442
ATXN10	6		Alternativesplicing;Ciliopathy;Completeproteome;Cytoplasm;Neurodegeneration;Referenceproteome;Spinocerebellarataxia	cell death;cell projection organization;cellular component organization;cellular component organization at cellular level;cellular component organization or biogenesis;cellular component organization or biogenesis at cellular level;cellular process;death;neuron projection development	binding	cell body;cell part;cell projection;cytoplasmic part;dendrite;intracellular part;neuron projection;neuronal cell body;perinuclear region of cytoplasm	10	10	10	7	8	8	7	8	7	7	8	7	24.4	53.488	Q9UBB4;Q9UBB4-2;E7ESH8;B1AHE3;E9PCY2;B1AHE4	Q9UBB4;Q9UBB4-2;E7ESH8	Ataxin-10	23.2258	23.8996	22.8322	23.1918	23.674	22.9814	23.2319	23.9762	23.2985
ATXN2L	14		Acetylation;Alternativesplicing;Completeproteome;Directproteinsequencing;Membrane;Methylation;Phosphoprotein;Referenceproteome			cell part;membrane	11	11	11	8	10	10	6	8	8	5	8	6	15.4	115.58	Q8WWM7-3;Q8WWM7;Q63ZY4;Q8WWM7-2;A8K1R6;Q8WWM7-4;Q8WWM7-5;Q8WWM7-6;H3BUF6;C9JXV8;Q8WWM7-7;H3BSK9;H3BUE3;H3BSQ5	Q8WWM7-3;Q8WWM7;Q63ZY4;Q8WWM7-2;A8K1R6;Q8WWM7-4;Q8WWM7-5;Q8WWM7-6;H3BUF6	Ataxin-2-like protein	22.5753	23.1199	22.907	22.37	23.3111	22.7796	22.2444	23.3734	22.7715
AZGP1	5		3D-structure;Completeproteome;Directproteinsequencing;Disulfidebond;Glycoprotein;Pyrrolidonecarboxylicacid;Referenceproteome;Secreted;Signal	antigen processing and presentation;biological adhesion;biological regulation;catabolic process;cell adhesion;cellular process;immune response;immune system process;lipid catabolic process;lipid metabolic process;metabolic process;negative regulation of biological process;negative regulation of cell proliferation;negative regulation of cellular process;primary metabolic process;regulation of biol…	binding;carboxylic acid binding;catalytic activity;fatty acid binding;hydrolase activity;hydrolase activity, acting on ester bonds;lipid binding;macromolecule transmembrane transporter activity;monocarboxylic acid binding;nuclease activity;protein transmembrane transporter activity;protein transporter activity;ribonuclease activity;substrate-specific transmembrane transporter activity;substrate-s…	cell part;extracellular region;macromolecular complex;membrane part;MHC class I protein complex;MHC protein complex;plasma membrane part;protein complex	7	7	7	2	1	1	4	3	2	2	3	1	33.2	34.258	P25311;C9JEV0;C9JAB1;A8MT79;H7BZJ8	P25311;C9JEV0;C9JAB1	Zinc-alpha-2-glycoprotein	22.8595	NaN	NaN	22.0897	20.4966	21.5211	22.0333	21.0305	NaN
AZU1	2		3D-structure;Antibiotic;Antimicrobial;Chemotaxis;Completeproteome;Directproteinsequencing;Disulfidebond;Glycoprotein;Heparin-binding;Polymorphism;Referenceproteome;Serineproteasehomolog;Signal	activation of protein kinase activity;activation of protein kinase C activity by G-protein coupled receptor protein signaling pathway;anti-apoptosis;biological regulation;cell activation;cell chemotaxis;cell migration;cell motility;cell surface receptor linked signaling pathway;cellular component movement;cellular extravasation;cellular process;cellular response to chemical stimulus;cellular resp…	binding;carbohydrate binding;catalytic activity;endopeptidase activity;glycosaminoglycan binding;heparin binding;hydrolase activity;pattern binding;peptidase activity;peptidase activity, acting on L-amino acid peptides;polysaccharide binding;serine hydrolase activity;serine-type endopeptidase activity;serine-type peptidase activity;toxin binding	azurophil granule;cell part;cytoplasmic membrane-bounded vesicle;cytoplasmic part;cytoplasmic vesicle;extracellular region;intracellular membrane-bounded organelle;intracellular organelle;intracellular part;lysosome;lytic vacuole;membrane-bounded organelle;membrane-bounded vesicle;organelle;primary lysosome;stored secretory granule;vacuole;vesicle	2	2	2	0	0	1	1	0	2	1	1	0	11.2	26.885	P20160;Q86SR2	P20160;Q86SR2	Azurocidin	NaN	NaN	NaN	NaN	NaN	19.0406	NaN	NaN	NaN
B2M	3	Antigen processing and presentation	3D-structure;Amyloid;Amyloidosis;Completeproteome;Directproteinsequencing;Diseasemutation;Disulfidebond;Glycation;Glycoprotein;Immunity;Immunoglobulindomain;MHCI;Pyrrolidonecarboxylicacid;Referenceproteome;Secreted;Signal	antigen processing and presentation;antigen processing and presentation of exogenous antigen;antigen processing and presentation of exogenous peptide antigen;antigen processing and presentation of exogenous peptide antigen via MHC class I;antigen processing and presentation of exogenous peptide antigen via MHC class I, TAP-dependent;antigen processing and presentation of exogenous peptide antigen…	binding;protein binding	cell part;coated vesicle membrane;cytoplasmic part;cytoplasmic vesicle membrane;cytoplasmic vesicle part;early endosome lumen;early endosome membrane;endocytic vesicle membrane;endoplasmic reticulum lumen;endoplasmic reticulum part;endosomal part;endosome lumen;endosome membrane;ER to Golgi transport vesicle membrane;extracellular region;Golgi apparatus part;Golgi membrane;intracellular organelle…	2	2	2	0	2	2	0	0	0	0	0	0	16.4	13.972	F5H6I0;P61769;H0YLF3	F5H6I0;P61769;H0YLF3	Beta-2-microglobulin;Beta-2-microglobulin form pI 5.3	NaN	22.2909	22.3616	NaN	NaN	NaN	NaN	NaN	NaN
BAG1	6	Protein processing in endoplasmic reticulum	3D-structure;Alternativeinitiation;Alternativesplicing;Apoptosis;Chaperone;Completeproteome;Cytoplasm;Nucleus;Referenceproteome;Repeat;Ublconjugation	anti-apoptosis;apoptosis;biological regulation;cell death;cell surface receptor linked signaling pathway;cellular macromolecule metabolic process;cellular metabolic process;cellular process;cellular protein metabolic process;cellular response to stimulus;chaperone cofactor-dependent protein refolding;chaperone-mediated protein folding;death;macromolecule metabolic process;metabolic process;negati…	binding;chaperone binding;molecular transducer activity;protein binding;receptor signaling protein activity;signal transducer activity	cell part;cytoskeleton;intermediate filament cytoskeleton;intracellular membrane-bounded organelle;intracellular non-membrane-bounded organelle;intracellular organelle;intracellular part;membrane-bounded organelle;non-membrane-bounded organelle;nucleus;organelle	3	3	3	3	1	3	3	2	2	2	3	3	9.3	38.778	Q99933;Q99933-3;Q99933-4;Q99933-2;E2QRM7;C9JYK5	Q99933;Q99933-3;Q99933-4;Q99933-2;E2QRM7	BAG family molecular chaperone regulator 1	20.5306	NaN	NaN	20.6085	20.3939	NaN	NaN	20.312	20.6443
BAG2	3	Protein processing in endoplasmic reticulum	Acetylation;Chaperone;Coiledcoil;Completeproteome;Phosphoprotein;Referenceproteome	cellular macromolecule metabolic process;cellular metabolic process;cellular process;cellular protein metabolic process;macromolecule metabolic process;metabolic process;primary metabolic process;protein folding;protein metabolic process	binding;chaperone binding;protein binding		3	3	3	1	2	2	2	1	1	1	1	1	12.8	23.772	O95816;B4DXE2;A2A296	O95816;B4DXE2	BAG family molecular chaperone regulator 2	NaN	20.8039	20.7159	20.1301	NaN	NaN	NaN	NaN	NaN
BAG5	3		3D-structure;Acetylation;Alternativesplicing;Chaperone;Completeproteome;Polymorphism;Referenceproteome;Repeat	biological regulation;cell death;cellular macromolecule metabolic process;cellular metabolic process;cellular process;cellular protein metabolic process;death;macromolecule metabolic process;metabolic process;negative regulation of biological process;negative regulation of catalytic activity;negative regulation of cellular metabolic process;negative regulation of cellular process;negative regulat…	binding;chaperone binding;enzyme binding;protein binding;ubiquitin protein ligase binding	cell part;cytoplasmic part;inclusion body;intracellular part;perinuclear region of cytoplasm	5	5	5	1	3	3	1	1	4	2	1	4	13.9	56.026	Q9UL15-2;Q9UL15;G3V274	Q9UL15-2;Q9UL15	BAG family molecular chaperone regulator 5	NaN	NaN	20.7562	NaN	NaN	21.343	NaN	NaN	20.9461
BAG6;BAT3	24		3D-structure;Acetylation;Alternativesplicing;Apoptosis;Chaperone;Chromatinregulator;Completeproteome;Cytoplasm;Differentiation;Immunity;Nucleus;Phosphoprotein;Polymorphism;Referenceproteome;Repeat;Spermatogenesis;Transport;Ublconjugation	anatomical structure development;apoptosis;apoptosis in response to endoplasmic reticulum stress;biological regulation;brain development;catabolic process;cell cycle process;cell death;cell differentiation;cellular catabolic process;cellular component assembly;cellular component assembly at cellular level;cellular component organization;cellular component organization at cellular level;cellular c…	binding;polyubiquitin binding;proteasome binding;protein binding;protein complex binding;ribonucleoprotein binding;ribosome binding;small conjugating protein binding;ubiquitin binding	BAT3 complex;cell part;cytoplasmic part;cytosolic part;ER membrane insertion complex;intracellular membrane-bounded organelle;intracellular organelle;intracellular part;macromolecular complex;membrane-bounded organelle;nucleus;organelle;protein complex	15	15	15	5	10	8	4	10	6	7	8	8	19.2	122.35	G3V1Z5;P46379-3;P46379;B0UX83;P46379-2;F8VX53;F8VXY4;E7EMZ4;F6TH84;F6S6P2;F6U341;F6X9W3;F6VEM6;F6WML8;F6RG75;F6XTU0;F6U1F2;F6UR09;H0Y710;F6TC96;H0Y4L1;E7EPC5;E9PEC8;C9JAY9	G3V1Z5;P46379-3;P46379;B0UX83;P46379-2;F8VX53;F8VXY4;E7EMZ4	Large proline-rich protein BAG6	23.0893	23.2144	22.2948	22.6561	23.2056	22.8427	22.6779	22.9791	22.8982
BANF1	1		3D-structure;Chromosome;Completeproteome;Cytoplasm;Diseasemutation;DNA-binding;Host-virusinteraction;Nucleus;Phosphoprotein;Referenceproteome	cellular macromolecule metabolic process;cellular metabolic process;cellular nitrogen compound metabolic process;cellular process;cellular process involved in reproduction;DNA integration;DNA metabolic process;DNA recombination;initiation of viral infection;interspecies interaction between organisms;macromolecule metabolic process;metabolic process;multi-organism process;nitrogen compound metabol…	binding;DNA binding;nucleic acid binding	cell part;chromosome;cytoplasmic part;cytosol;intracellular non-membrane-bounded organelle;intracellular organelle;intracellular organelle part;intracellular part;non-membrane-bounded organelle;nuclear part;nucleoplasm;organelle;organelle part	2	2	2	2	2	0	2	2	2	2	2	2	40.4	10.058	O75531	O75531	Barrier-to-autointegration factor	23.423	24.1296	NaN	21.7633	23.4227	23.7329	23.5438	22.9756	23.0973
BASP1	2		Alternativesplicing;Cellmembrane;Cellprojection;Completeproteome;Directproteinsequencing;Lipoprotein;Membrane;Myristate;Phosphoprotein;Polymorphism;Referenceproteome	anatomical structure development;anatomical structure morphogenesis;anterior/posterior pattern specification;biological regulation;cell differentiation;cell differentiation involved in kidney development;cell morphogenesis;cell morphogenesis involved in differentiation;cellular component morphogenesis;cellular component organization;cellular component organization or biogenesis;cellular developme…	binding;DNA binding;nucleic acid binding;protein binding;protein binding transcription factor activity;protein domain specific binding;regulatory region DNA binding;regulatory region nucleic acid binding;transcription cofactor activity;transcription corepressor activity;transcription factor binding transcription factor activity;transcription regulatory region DNA binding	cell part;cell projection part;cytoplasm;cytoskeleton;growth cone;intracellular non-membrane-bounded organelle;intracellular organelle;intracellular organelle part;intracellular part;membrane;non-membrane-bounded organelle;nuclear body;nuclear part;nuclear speck;nucleoplasm part;organelle;organelle part;plasma membrane;site of polarized growth	4	4	4	4	3	4	4	4	3	4	4	4	35.7	22.693	P80723;P80723-2	P80723;P80723-2	Brain acid soluble protein 1	22.7067	22.0246	23.0229	23.3022	22.3908	23.7603	23.3503	22.861	23.6977
BAX	5	Amyotrophic lateral sclerosis (ALS);Apoptosis;Colorectal cancer;Huntington's disease;ko05152;Neurotrophin signaling pathway;p53 signaling pathway;Pathways in cancer;Prion diseases;Protein processing in endoplasmic reticulum	3D-structure;Acetylation;Alternativesplicing;Apoptosis;Completeproteome;Cytoplasm;Membrane;Mitochondrion;Polymorphism;Referenceproteome;Transmembrane;Transmembranehelix;Tumorsuppressor	activation of caspase activity;activation of caspase activity by cytochrome c;activation of pro-apoptotic gene products;anti-apoptosis;apoptosis;apoptotic mitochondrial changes;B cell apoptosis;biological regulation;catabolic process;cell death;cellular catabolic process;cellular chemical homeostasis;cellular component assembly;cellular component organization;cellular component organization at ce…	BH domain binding;BH3 domain binding;binding;channel activity;death domain binding;identical protein binding;lipid binding;passive transmembrane transporter activity;protein binding;protein dimerization activity;protein domain specific binding;protein heterodimerization activity;protein homodimerization activity;transmembrane transporter activity;transporter activity	Bcl-2 family protein complex;cell part;cytoplasmic part;cytosol;endoplasmic reticulum membrane;endoplasmic reticulum part;intracellular membrane-bounded organelle;intracellular organelle;intracellular organelle part;intracellular part;macromolecular complex;membrane;membrane part;membrane-bounded organelle;mitochondrial membrane;mitochondrial outer membrane;mitochondrial part;mitochondrial permea…	3	3	3	3	3	3	2	3	3	3	2	3	21.1	24.22	Q07812-2;Q07812;Q07812-8;Q07812-7;Q07812-5	Q07812-2;Q07812;Q07812-8;Q07812-7;Q07812-5	Apoptosis regulator BAX	21.6687	20.7379	21.6976	20.6683	21.0856	21.1829	20.7844	20.2999	21.8173
BAZ1A	3		Alternativesplicing;Bromodomain;Coiledcoil;Completeproteome;Metal-binding;Nucleus;Phosphoprotein;Polymorphism;Referenceproteome;Transcription;Transcriptionregulation;Zinc;Zinc-finger	biological regulation;biosynthetic process;cellular biosynthetic process;cellular component organization;cellular component organization at cellular level;cellular component organization or biogenesis;cellular component organization or biogenesis at cellular level;cellular macromolecule biosynthetic process;cellular macromolecule metabolic process;cellular metabolic process;cellular nitrogen comp…	binding;cation binding;ion binding;metal ion binding;protein binding;transition metal ion binding;zinc ion binding	ACF complex;cell part;chromatin accessibility complex;chromatin assembly complex;chromatin remodeling complex;intracellular organelle part;intracellular part;macromolecular complex;nuclear part;organelle part;protein complex	3	3	3	0	2	3	0	1	3	0	3	2	2.8	178.7	Q9NRL2;Q9NRL2-2;F5H239	Q9NRL2;Q9NRL2-2	Bromodomain adjacent to zinc finger domain protein 1A	NaN	NaN	NaN	NaN	NaN	NaN	NaN	19.0746	NaN
BCAS2	1	Spliceosome	Acetylation;Coiledcoil;Completeproteome;Directproteinsequencing;mRNAprocessing;mRNAsplicing;Nucleus;Polymorphism;Referenceproteome;Spliceosome	cellular macromolecule metabolic process;cellular metabolic process;cellular nitrogen compound metabolic process;cellular process;macromolecule metabolic process;metabolic process;mRNA metabolic process;mRNA processing;nitrogen compound metabolic process;nucleic acid metabolic process;nucleobase-containing compound metabolic process;primary metabolic process;RNA metabolic process;RNA processing;R…		cell part;intracellular non-membrane-bounded organelle;intracellular organelle;intracellular organelle part;intracellular part;macromolecular complex;non-membrane-bounded organelle;nuclear part;nucleolus;organelle;organelle part;ribonucleoprotein complex;spliceosomal complex	5	5	5	2	3	3	3	3	3	3	1	3	25.3	26.131	O75934	O75934	Pre-mRNA-splicing factor SPF27	21.2441	21.4888	20.7363	21.1321	21.0031	20.3963	20.7853	NaN	21.0443
BCAT1	6	Pantothenate and CoA biosynthesis;Valine, leucine and isoleucine biosynthesis;Valine, leucine and isoleucine degradation	3D-structure;Acetylation;Amino-acidbiosynthesis;Aminotransferase;Branched-chainaminoacidbiosynthesis;Completeproteome;Cytoplasm;Polymorphism;Pyridoxalphosphate;Referenceproteome;Transferase	amine biosynthetic process;amine catabolic process;amine metabolic process;biosynthetic process;branched chain family amino acid biosynthetic process;branched chain family amino acid catabolic process;branched chain family amino acid metabolic process;carboxylic acid biosynthetic process;carboxylic acid catabolic process;carboxylic acid metabolic process;catabolic process;cell cycle process;cell …	branched-chain-amino-acid transaminase activity;catalytic activity;L-isoleucine transaminase activity;L-leucine transaminase activity;L-valine transaminase activity;transaminase activity;transferase activity;transferase activity, transferring nitrogenous groups	cell part;cytoplasmic part;cytosol;intracellular part	7	7	7	3	7	5	5	6	5	3	6	5	18.3	44.131	F5H5E4;P54687;P54687-4;P54687-3;P54687-2;F5H2F2	F5H5E4;P54687;P54687-4;P54687-3;P54687-2	Branched-chain-amino-acid aminotransferase;Branched-chain-amino-acid aminotransferase, cytosolic	21.9815	22.7568	22.2845	22.0331	22.7781	21.9085	22.0669	23.0173	23.0772
BCAT2	3	Pantothenate and CoA biosynthesis;Valine, leucine and isoleucine biosynthesis;Valine, leucine and isoleucine degradation	3D-structure;Acetylation;Alternativesplicing;Amino-acidbiosynthesis;Aminotransferase;Branched-chainaminoacidbiosynthesis;Completeproteome;Cytoplasm;Mitochondrion;Polymorphism;Pyridoxalphosphate;Referenceproteome;Transferase;Transitpeptide		branched-chain-amino-acid transaminase activity;catalytic activity;L-isoleucine transaminase activity;L-leucine transaminase activity;L-valine transaminase activity;transaminase activity;transferase activity;transferase activity, transferring nitrogenous groups	cell part;cytoplasmic part;intracellular organelle lumen;intracellular organelle part;intracellular part;membrane-enclosed lumen;mitochondrial matrix;mitochondrial part;organelle lumen;organelle part	2	2	2	1	0	2	2	1	2	2	1	2	7.4	44.287	O15382;B3KSI3;O15382-2	O15382;B3KSI3;O15382-2	Branched-chain-amino-acid aminotransferase, mitochondrial;Branched-chain-amino-acid aminotransferase	NaN	NaN	19.9658	NaN	NaN	20.1926	20.3511	NaN	19.9094
BCCIP	5		Alternativesplicing;Cellcycle;Completeproteome;DNAdamage;DNArepair;Nucleus;Phosphoprotein;Polymorphism;Referenceproteome	biological regulation;cell cycle;cell differentiation;cellular developmental process;cellular macromolecule metabolic process;cellular metabolic process;cellular nitrogen compound metabolic process;cellular process;cellular response to stimulus;cellular response to stress;developmental process;DNA metabolic process;DNA repair;macromolecule metabolic process;metabolic process;neuroendocrine cell d…	binding;enzyme regulator activity;kinase regulator activity;protein binding	cell part;cyclin-dependent protein kinase holoenzyme complex;intracellular organelle part;intracellular part;macromolecular complex;nuclear cyclin-dependent protein kinase holoenzyme complex;nuclear part;organelle part;protein complex	6	6	6	4	5	3	3	6	2	3	5	4	28	35.979	Q9P287;Q9P287-3;Q9P287-2;Q9P287-4;B4E318	Q9P287;Q9P287-3;Q9P287-2;Q9P287-4;B4E318	BRCA2 and CDKN1A-interacting protein	21.3541	22.8827	20.6814	21.7063	22.6223	22.1222	21.6877	22.6013	22.1055
BCKDHA	6	Valine, leucine and isoleucine degradation	3D-structure;Completeproteome;Directproteinsequencing;Diseasemutation;Maplesyrupurinedisease;Metal-binding;Mitochondrion;Oxidoreductase;Phosphoprotein;Polymorphism;Potassium;Referenceproteome;Thiaminepyrophosphate;Transitpeptide	amine catabolic process;amine metabolic process;branched chain family amino acid catabolic process;branched chain family amino acid metabolic process;carboxylic acid catabolic process;carboxylic acid metabolic process;catabolic process;cellular amine metabolic process;cellular amino acid catabolic process;cellular amino acid metabolic process;cellular catabolic process;cellular ketone metabolic p…	3-methyl-2-oxobutanoate dehydrogenase (2-methylpropanoyl-transferring) activity;alpha-ketoacid dehydrogenase activity;binding;carbon-carbon lyase activity;carboxy-lyase activity;catalytic activity;cation binding;ion binding;lyase activity;metal ion binding;oxidoreductase activity;oxidoreductase activity, acting on the aldehyde or oxo group of donors;oxidoreductase activity, acting on the aldehyde…	cell part;cytoplasmic part;dihydrolipoyl dehydrogenase complex;intracellular organelle part;intracellular part;macromolecular complex;mitochondrial alpha-ketoglutarate dehydrogenase complex;mitochondrial part;mitochondrial tricarboxylic acid cycle enzyme complex;organelle part;protein complex;tricarboxylic acid cycle enzyme complex	5	5	5	4	4	4	4	3	4	3	3	4	13.6	54.202	F5H5P2;P12694;B4DP47;F5GXU9;E7ESE6;H0YH31	F5H5P2;P12694;B4DP47;F5GXU9	2-oxoisovalerate dehydrogenase subunit alpha, mitochondrial	21.7907	20.7257	20.6374	21.7897	20.4151	20.9136	22.1939	20.8366	20.7111
BCL2L13	6		3D-structure;Alternativesplicing;Apoptosis;Completeproteome;Membrane;Mitochondrion;Nucleus;Phosphoprotein;Polymorphism;Referenceproteome;Repeat;Transmembrane;Transmembranehelix	biological regulation;induction of apoptosis;induction of programmed cell death;positive regulation of apoptosis;positive regulation of biological process;positive regulation of cell death;positive regulation of cellular process;positive regulation of programmed cell death;regulation of apoptosis;regulation of biological process;regulation of cell death;regulation of cellular process;regulation o…	apoptotic protease activator activity;caspase activator activity;caspase regulator activity;enzyme activator activity;enzyme regulator activity;peptidase activator activity;peptidase regulator activity	cell part;cytoplasmic part;integral to membrane;intracellular membrane-bounded organelle;intracellular organelle;intracellular organelle part;intracellular part;intrinsic to membrane;membrane;membrane part;membrane-bounded organelle;mitochondrial membrane;mitochondrial part;nucleus;organelle;organelle membrane;organelle part	3	3	3	1	1	1	1	1	1	2	0	1	13.8	52.723	Q9BXK5;B7Z238;B3KPE7;Q9BXK5-2;E9PDD6;F2Z2C3	Q9BXK5;B7Z238;B3KPE7	Bcl-2-like protein 13	NaN	NaN	NaN	NaN	NaN	NaN	20.5277	NaN	NaN
BCLAF1	10		Acetylation;Alternativesplicing;Completeproteome;Cytoplasm;Directproteinsequencing;DNA-binding;Nucleus;Phosphoprotein;Polymorphism;Referenceproteome;Repressor;Transcription;Transcriptionregulation	biological regulation;biosynthetic process;cellular biosynthetic process;cellular macromolecule biosynthetic process;cellular macromolecule metabolic process;cellular metabolic process;cellular nitrogen compound metabolic process;cellular process;cellular response to stimulus;cellular response to stress;induction of apoptosis;induction of programmed cell death;macromolecule biosynthetic process;m…	binding;DNA binding;nucleic acid binding;protein binding	cell part;cytoplasm;intracellular non-membrane-bounded organelle;intracellular organelle;intracellular organelle part;intracellular part;non-membrane-bounded organelle;nuclear part;nucleolus;organelle;organelle part	11	11	11	5	7	9	5	6	6	4	5	5	13	106.12	Q9NYF8;Q9NYF8-2;E9PK91;Q9NYF8-3;E9PKI6;E9PQN2;E9PK09;Q9NYF8-4;E9PJA7;H0YF00	Q9NYF8;Q9NYF8-2;E9PK91;Q9NYF8-3;E9PKI6;E9PQN2;E9PK09;Q9NYF8-4;E9PJA7	Bcl-2-associated transcription factor 1	24.3195	23.0711	23.7387	24.0089	23.6636	23.5246	23.658	23.4541	23.2711
BCR	9	Chronic myeloid leukemia;Pathways in cancer	3D-structure;Alternativesplicing;ATP-binding;Chromosomalrearrangement;Completeproteome;GTPaseactivation;Guanine-nucleotidereleasingfactor;Kinase;Nucleotide-binding;Phosphoprotein;Polymorphism;Proto-oncogene;Referenceproteome;Serine/threonine-proteinkinase;Transferase	biological regulation;cellular process;cellular response to stimulus;intracellular signal transduction;regulation of biological process;regulation of cellular process;regulation of Ras protein signal transduction;regulation of response to stimulus;regulation of Rho protein signal transduction;regulation of signal transduction;regulation of signaling;regulation of small GTPase mediated signal tran…	adenyl nucleotide binding;adenyl ribonucleotide binding;ATP binding;binding;catalytic activity;enzyme activator activity;enzyme regulator activity;GTPase activator activity;GTPase regulator activity;guanyl-nucleotide exchange factor activity;kinase activity;nucleoside-triphosphatase regulator activity;nucleotide binding;phosphotransferase activity, alcohol group as acceptor;protein kinase activit…	cell part;cytoplasmic part;cytosol;intracellular;intracellular part	7	6	6	2	3	3	4	3	1	2	3	0	7	142.82	P11274;P11274-2;H0Y2V4;H0Y554;A9UF05;A9UF01;E9PGJ4;A9UF04;E9PCM1	P11274;P11274-2;H0Y2V4	Breakpoint cluster region protein	19.821	20.2218	19.651	20.4283	20.1586	NaN	20.3871	20.0671	NaN
BDH2	6	Butanoate metabolism;Synthesis and degradation of ketone bodies	3D-structure;Acetylation;Alternativesplicing;Completeproteome;Cytoplasm;NAD;Oxidoreductase;Phosphoprotein;Polymorphism;Referenceproteome	alcohol metabolic process;benzene-containing compound metabolic process;biological regulation;biosynthetic process;carboxylic acid catabolic process;carboxylic acid metabolic process;catabolic process;catechol-containing compound metabolic process;cation homeostasis;cellular aromatic compound metabolic process;cellular biosynthetic process;cellular catabolic process;cellular ketone metabolic proc…	2,3-dihydro-2,3-dihydroxybenzoate dehydrogenase activity;3-hydroxybutyrate dehydrogenase activity;binding;catalytic activity;coenzyme binding;cofactor binding;NAD binding;nucleotide binding;oxidoreductase activity;oxidoreductase activity, acting on CH-OH group of donors;oxidoreductase activity, acting on the CH-CH group of donors;oxidoreductase activity, acting on the CH-CH group of donors, NAD o…	cell part;cytoplasm;intracellular part	2	2	2	1	0	1	2	2	1	1	1	1	10.6	26.724	Q9BUT1;Q9BUT1-2;Q9BUT1-3;D6RIR6;D6R9U8;D6RFG2	Q9BUT1;Q9BUT1-2;Q9BUT1-3;D6RIR6;D6R9U8;D6RFG2	3-hydroxybutyrate dehydrogenase type 2	NaN	NaN	NaN	20.7613	19.7903	NaN	NaN	NaN	NaN
BID	3	Alzheimer's disease;Amyotrophic lateral sclerosis (ALS);Apoptosis;ko05152;Natural killer cell mediated cytotoxicity;p53 signaling pathway;Pathways in cancer;Viral myocarditis	3D-structure;Alternativesplicing;Apoptosis;Completeproteome;Cytoplasm;Membrane;Mitochondrion;Phosphoprotein;Polymorphism;Referenceproteome;Ublconjugation	activation of pro-apoptotic gene products;apoptosis;apoptotic mitochondrial changes;biological regulation;cell death;cellular component organization;cellular component organization at cellular level;cellular component organization or biogenesis;cellular component organization or biogenesis at cellular level;cellular process;death;establishment of localization;establishment of protein localization…	binding;cytokine receptor binding;death receptor binding;protein binding;receptor binding;tumor necrosis factor receptor superfamily binding	cell fraction;cell part;cytoplasmic part;cytosol;insoluble fraction;intracellular organelle part;intracellular part;membrane;membrane fraction;mitochondrial membrane;mitochondrial outer membrane;mitochondrial part;organelle membrane;organelle outer membrane;organelle part;outer membrane	2	2	2	2	2	1	2	1	2	1	2	2	11.6	26.836	P55957-2;P55957;P55957-4	P55957-2;P55957;P55957-4	BH3-interacting domain death agonist;BH3-interacting domain death agonist p15;BH3-interacting domain death agonist p13;BH3-interacting domain death agonist p11	19.8953	21.0645	NaN	20.8294	NaN	21.0196	NaN	20.8313	21.0951
BIN1	11		3D-structure;Alternativesplicing;Coiledcoil;Completeproteome;Cytoplasm;Developmentalprotein;Differentiation;Diseasemutation;Endocytosis;Host-virusinteraction;Nucleus;Phosphoprotein;Referenceproteome;SH3domain;Tumorsuppressor	cell proliferation;cellular component organization;cellular component organization or biogenesis;cellular membrane organization;cellular process;developmental process;endocytosis;establishment of localization;interspecies interaction between organisms;membrane invagination;membrane organization;multicellular organismal development;multicellular organismal process;multi-organism process;transport;…		actin cytoskeleton;cell part;cytoskeleton;intracellular membrane-bounded organelle;intracellular non-membrane-bounded organelle;intracellular organelle;intracellular part;membrane-bounded organelle;non-membrane-bounded organelle;nucleus;organelle	6	6	6	5	5	3	4	4	1	6	3	1	16.4	64.699	O00499;O00499-5;O00499-2;O00499-3;O00499-11;O00499-6;O00499-4;O00499-8;O00499-7;O00499-10;O00499-9	O00499;O00499-5;O00499-2;O00499-3;O00499-11;O00499-6;O00499-4;O00499-8;O00499-7;O00499-10;O00499-9	Myc box-dependent-interacting protein 1	21.8389	20.5304	20.6568	21.938	21.1987	NaN	21.4123	21.0048	NaN
BIN2	3		Alternativesplicing;Coiledcoil;Completeproteome;Cytoplasm;Phosphoprotein;Polymorphism;Referenceproteome		binding;protein binding	cell part;cytoplasm;intracellular part	8	8	8	7	4	6	6	4	5	7	6	5	25.8	61.874	Q9UBW5;F5H0W4;Q9UBW5-2	Q9UBW5;F5H0W4;Q9UBW5-2	Bridging integrator 2	23.7935	22.544	22.8372	23.4157	22.2288	22.7669	24.2481	22.453	23.2333
BIRC6	1	Ubiquitin mediated proteolysis	3D-structure;Apoptosis;Cellcycle;Celldivision;Completeproteome;Cytoplasm;Cytoskeleton;Endosome;Golgiapparatus;Ligase;Membrane;Mitosis;Phosphoprotein;Proteaseinhibitor;Referenceproteome;Thiolproteaseinhibitor;Ublconjugation;Ublconjugationpathway	anti-apoptosis;apoptosis;biological regulation;cell death;cellular process;death;negative regulation of apoptosis;negative regulation of biological process;negative regulation of cell death;negative regulation of cellular process;negative regulation of programmed cell death;programmed cell death;regulation of apoptosis;regulation of biological process;regulation of cell death;regulation of cellul…	binding;cysteine-type endopeptidase inhibitor activity;endopeptidase inhibitor activity;endopeptidase regulator activity;enzyme inhibitor activity;enzyme regulator activity;peptidase inhibitor activity;peptidase regulator activity;protein binding	cell part;intracellular	3	3	3	0	1	2	0	0	0	0	1	0	0.9	530.25	Q9NR09	Q9NR09	Baculoviral IAP repeat-containing protein 6	NaN	NaN	18.9518	NaN	NaN	NaN	NaN	NaN	NaN
BLMH	2		3D-structure;Acetylation;Completeproteome;Cytoplasm;Directproteinsequencing;Hydrolase;Polymorphism;Protease;Referenceproteome;Thiolprotease	antigen processing and presentation;antigen processing and presentation of peptide antigen;antigen processing and presentation of peptide antigen via MHC class I;cellular macromolecule metabolic process;cellular metabolic process;cellular process;cellular protein metabolic process;immune system process;macromolecule metabolic process;macromolecule modification;metabolic process;primary metabolic …	aminopeptidase activity;binding;carboxypeptidase activity;catalytic activity;cysteine-type endopeptidase activity;cysteine-type peptidase activity;endopeptidase activity;exopeptidase activity;hydrolase activity;peptidase activity;peptidase activity, acting on L-amino acid peptides;protein binding	cell part;cytoplasm;cytoplasmic part;cytosol;intracellular membrane-bounded organelle;intracellular organelle;intracellular part;membrane-bounded organelle;nucleus;organelle	4	4	4	4	3	2	2	2	3	3	3	4	11.6	52.562	Q13867;E7EMN3	Q13867;E7EMN3	Bleomycin hydrolase	22.5673	21.9851	21.8536	22.4472	23.038	22.2909	22.8432	22.5278	22.2117
BLVRA	2	Porphyrin and chlorophyll metabolism	3D-structure;Acetylation;Completeproteome;Cytoplasm;Directproteinsequencing;Metal-binding;NAD;NADP;Oxidoreductase;Phosphoprotein;Polymorphism;Referenceproteome;Zinc	catabolic process;cellular catabolic process;cellular metabolic process;cellular nitrogen compound catabolic process;cellular nitrogen compound metabolic process;cellular process;cofactor catabolic process;cofactor metabolic process;heme catabolic process;heme metabolic process;heterocycle catabolic process;heterocycle metabolic process;metabolic process;nitrogen compound metabolic process;pigmen…	biliverdin reductase activity;binding;catalytic activity;cation binding;ion binding;metal ion binding;nucleotide binding;oxidoreductase activity;oxidoreductase activity, acting on the CH-CH group of donors;oxidoreductase activity, acting on the CH-CH group of donors, NAD or NADP as acceptor;transition metal ion binding;zinc ion binding	cell part;cytoplasmic part;cytosol;intracellular part	4	4	4	4	2	4	4	4	3	4	4	3	16.6	33.428	P53004;C9J1E1	P53004	Biliverdin reductase A	23.1397	22.1187	21.9344	23.5368	22.8231	22.1205	23.6828	22.4801	22.6325
BLVRB	1	Porphyrin and chlorophyll metabolism;Riboflavin metabolism	3D-structure;Completeproteome;Cytoplasm;Directproteinsequencing;NADP;Oxidoreductase;Polymorphism;Referenceproteome	catabolic process;cellular catabolic process;cellular metabolic process;cellular nitrogen compound catabolic process;cellular nitrogen compound metabolic process;cellular process;cofactor catabolic process;cofactor metabolic process;heme catabolic process;heme metabolic process;heterocycle catabolic process;heterocycle metabolic process;metabolic process;nitrogen compound metabolic process;pigmen…	biliverdin reductase activity;binding;catalytic activity;flavin reductase activity;nucleotide binding;oxidoreductase activity;oxidoreductase activity, acting on the CH-CH group of donors;oxidoreductase activity, acting on the CH-CH group of donors, NAD or NADP as acceptor;oxidoreductase activity, acting on the CH-NH group of donors;oxidoreductase activity, acting on the CH-NH group of donors, NAD…	cell part;cytoplasmic part;cytosol;intracellular part	6	6	6	4	6	5	4	4	4	3	3	4	42.7	22.119	P30043	P30043	Flavin reductase (NADPH)	22.4909	23.2271	22.8782	22.5121	21.9298	23.2125	22.9206	22.282	23.7946
BMP2K	5		Alternativesplicing;ATP-binding;Completeproteome;Kinase;Nucleotide-binding;Nucleus;Phosphoprotein;Polymorphism;Referenceproteome;Serine/threonine-proteinkinase;Transferase		adenyl nucleotide binding;adenyl ribonucleotide binding;ATP binding;binding;catalytic activity;kinase activity;nucleotide binding;phosphotransferase activity, alcohol group as acceptor;protein kinase activity;protein serine/threonine kinase activity;purine nucleotide binding;purine ribonucleoside triphosphate binding;purine ribonucleotide binding;ribonucleotide binding;transferase activity;transf…	cell part;intracellular membrane-bounded organelle;intracellular organelle;intracellular part;membrane-bounded organelle;nucleus;organelle	3	3	3	2	3	1	1	1	1	1	1	1	4.6	129.17	Q9NSY1;H0Y9P1;Q9NSY1-3;C9JC56;Q9NSY1-2	Q9NSY1;H0Y9P1;Q9NSY1-3;C9JC56;Q9NSY1-2	BMP-2-inducible protein kinase	19.4074	19.9136	NaN	NaN	NaN	NaN	NaN	NaN	NaN
BOD1L1	1		Acetylation;Completeproteome;Isopeptidebond;Phosphoprotein;Polymorphism;Referenceproteome;Ublconjugation		binding;DNA binding;nucleic acid binding		3	3	3	0	0	2	0	0	0	0	0	0	1.6	330.46	Q8NFC6	Q8NFC6	Biorientation of chromosomes in cell division protein 1-like 1	NaN	NaN	18.8169	NaN	NaN	NaN	NaN	NaN	NaN
BOLA2B;BOLA2	5		Acetylation;Alternativesplicing;Completeproteome;Directproteinsequencing;Referenceproteome				3	3	3	2	2	1	3	2	2	2	2	1	13.7	27.554	H3BVE0;H3BTW0;H3BV85;Q9H3K6;Q9H3K6-2	H3BVE0;H3BTW0;H3BV85;Q9H3K6;Q9H3K6-2	BolA-like protein 2	21.8657	22.239	NaN	21.9039	20.9895	21.2853	21.9224	22.1932	NaN
BOP1;KM-PA-2	4		Acetylation;Completeproteome;Nucleus;Phosphoprotein;Referenceproteome;Repeat;Ribosomebiogenesis;rRNAprocessing;WDrepeat	biological regulation;cell proliferation;cellular macromolecule metabolic process;cellular metabolic process;cellular nitrogen compound metabolic process;cellular process;macromolecule metabolic process;maturation of LSU-rRNA;maturation of LSU-rRNA from tricistronic rRNA transcript (SSU-rRNA, 5.8S rRNA, LSU-rRNA);metabolic process;ncRNA metabolic process;ncRNA processing;nitrogen compound metabol…	binding;protein binding	cell part;intracellular membrane-bounded organelle;intracellular organelle;intracellular organelle part;intracellular part;macromolecular complex;membrane-bounded organelle;nuclear part;nucleolar part;nucleoplasm;nucleus;organelle;organelle part;PeBoW complex;protein complex	6	6	6	2	3	3	4	4	4	2	4	4	12.2	83.629	Q14137;Q96Q25;E9PIF8;E9PRN9	Q14137;Q96Q25;E9PIF8	Ribosome biogenesis protein BOP1	NaN	22.1605	20.6785	20.6344	22.5001	21.2563	20.4977	22.5236	20.6589
BPNT1	9	Sulfur metabolism	3D-structure;Acetylation;Alternativesplicing;Completeproteome;Hydrolase;Lithium;Magnesium;Metal-binding;Referenceproteome	3'-phosphoadenosine 5'-phosphosulfate metabolic process;anatomical structure development;cellular lipid metabolic process;cellular metabolic process;cellular nitrogen compound metabolic process;cellular process;developmental process;glycerolipid metabolic process;glycerophospholipid metabolic process;heterocycle metabolic process;lipid metabolic process;lipid modification;lipid phosphorylation;me…	3'(2'),5'-bisphosphate nucleotidase activity;catalytic activity;hydrolase activity;hydrolase activity, acting on ester bonds;nucleotidase activity;phosphatase activity;phosphoric ester hydrolase activity	cell part;cytoplasmic part;cytosol;intracellular part	3	3	3	1	1	3	3	3	2	1	1	2	9.8	35.744	O95861-2;C9JI50;O95861;A6NF51;B4DUS9;B4DPS5;F8W1J0;F8VZG4;F8VVW8	O95861-2;C9JI50;O95861;A6NF51;B4DUS9;B4DPS5	3(2),5-bisphosphate nucleotidase 1	NaN	NaN	20.2226	20.9318	20.8797	20.7426	NaN	NaN	20.636
BRCC3	9		Acetylation;Alternativesplicing;Chromatinregulator;Chromosomalrearrangement;Completeproteome;Directproteinsequencing;DNAdamage;DNArepair;Hydrolase;Metal-binding;Metalloprotease;Nucleus;Polymorphism;Protease;Proto-oncogene;Referenceproteome;Ublconjugationpathway;Zinc	biological regulation;cell cycle checkpoint;cellular component organization;cellular component organization at cellular level;cellular component organization or biogenesis;cellular component organization or biogenesis at cellular level;cellular macromolecule metabolic process;cellular metabolic process;cellular nitrogen compound metabolic process;cellular process;cellular protein metabolic proces…	binding;catalytic activity;cation binding;cysteine-type peptidase activity;enzyme regulator activity;hydrolase activity;hydrolase activity, acting on ester bonds;ion binding;metal ion binding;metallopeptidase activity;peptidase activity;peptidase activity, acting on L-amino acid peptides;polyubiquitin binding;protein binding;small conjugating protein binding;small conjugating protein-specific pro…	BRCA1-A complex;BRISC complex;cell part;intracellular organelle part;intracellular part;macromolecular complex;nuclear part;nuclear ubiquitin ligase complex;organelle part;protein complex;ubiquitin ligase complex	4	4	4	3	3	2	3	2	3	2	3	3	14.6	36.072	P46736;P46736-3;P46736-2;P46736-5;C9J9C3;H9KVA9;C9JZJ2;P46736-4;C9J8X9	P46736;P46736-3;P46736-2;P46736-5;C9J9C3;H9KVA9;C9JZJ2;P46736-4	Lys-63-specific deubiquitinase BRCC36	20.3519	19.891	19.9718	20.1982	20.1452	19.9253	20.226	19.8453	20.8255
BRD4	10		3D-structure;Acetylation;Alternativesplicing;Bromodomain;Chromosomalrearrangement;Coiledcoil;Completeproteome;Host-virusinteraction;Nucleus;Phosphoprotein;Polymorphism;Referenceproteome;Repeat;Transcription;Transcriptionregulation	biological regulation;biosynthetic process;cell cycle process;cellular biosynthetic process;cellular macromolecule biosynthetic process;cellular macromolecule metabolic process;cellular metabolic process;cellular nitrogen compound metabolic process;cellular process;interspecies interaction between organisms;macromolecule biosynthetic process;macromolecule metabolic process;metabolic process;multi…	binding;catalytic activity;kinase activity;phosphotransferase activity, alcohol group as acceptor;protein binding;protein binding transcription factor activity;protein kinase activity;protein serine/threonine kinase activity;transcription coactivator activity;transcription cofactor activity;transcription factor binding transcription factor activity;transferase activity;transferase activity, trans…	cell part;chromosome;condensed chromosome;condensed nuclear chromosome;cytoplasm;intracellular membrane-bounded organelle;intracellular non-membrane-bounded organelle;intracellular organelle;intracellular organelle part;intracellular part;membrane-bounded organelle;non-membrane-bounded organelle;nuclear chromosome;nuclear part;nucleus;organelle;organelle part	7	7	4	4	3	5	2	3	2	3	2	2	5.7	152.22	O60885;Q4G0X8;E7ESP5;O60885-2;B4DS09;Q58F21-2;Q58F21;A6NF68;H0Y665;H0YAU3	O60885;Q4G0X8;E7ESP5;O60885-2	Bromodomain-containing protein 4	20.7278	20.8972	21.4349	20.7307	19.8149	20.8962	20.8673	21.0546	20.5463
BRIX1	1		Acetylation;Completeproteome;Nucleus;Referenceproteome;Ribosomebiogenesis	cellular component biogenesis;cellular component biogenesis at cellular level;cellular component organization or biogenesis;cellular component organization or biogenesis at cellular level;cellular process;ribonucleoprotein complex biogenesis;ribosome biogenesis		cell part;intracellular non-membrane-bounded organelle;intracellular organelle;intracellular organelle part;intracellular part;non-membrane-bounded organelle;nuclear part;nucleolus;organelle;organelle part	4	4	4	0	1	1	1	1	2	1	1	1	15.6	41.401	Q8TDN6	Q8TDN6	Ribosome biogenesis protein BRX1 homolog	NaN	NaN	NaN	NaN	NaN	19.8311	NaN	NaN	NaN
BSG	5		3D-structure;Alternativesplicing;Bloodgroupantigen;Cellmembrane;Completeproteome;Directproteinsequencing;Disulfidebond;Glycoprotein;Immunoglobulindomain;Lectin;Mannose-binding;Membrane;Phosphoprotein;Polymorphism;Referenceproteome;Signal;Transmembrane;Transmembranehelix	biological regulation;blood coagulation;carboxylic acid metabolic process;cell migration;cell motility;cell surface receptor linked signaling pathway;cellular component movement;cellular ketone metabolic process;cellular metabolic process;cellular process;cellular response to stimulus;coagulation;hemostasis;immune system process;leukocyte migration;locomotion;metabolic process;monocarboxylic acid…	binding;carbohydrate binding;carboxylic acid transmembrane transporter activity;lactate transmembrane transporter activity;mannose binding;monocarboxylic acid transmembrane transporter activity;monosaccharide binding;organic acid transmembrane transporter activity;substrate-specific transmembrane transporter activity;substrate-specific transporter activity;sugar binding;transmembrane transporter …	cell part;cytoplasmic membrane-bounded vesicle;cytoplasmic part;cytoplasmic vesicle;Golgi apparatus part;Golgi membrane;integral to membrane;intracellular membrane-bounded organelle;intracellular organelle;intracellular organelle part;intracellular part;intrinsic to membrane;melanosome;membrane;membrane part;membrane-bounded organelle;membrane-bounded vesicle;organelle;organelle membrane;organell…	3	3	3	3	0	1	1	2	2	2	3	2	8.3	42.2	P35613;P35613-2;A8MZ77;P35613-4;P35613-3	P35613;P35613-2;A8MZ77;P35613-4;P35613-3	Basigin	19.2762	NaN	NaN	NaN	19.0932	20.9832	18.061	18.2793	19.3137
BTAF1	3		ATP-binding;Completeproteome;Directproteinsequencing;DNA-binding;Helicase;Hydrolase;Nucleotide-binding;Nucleus;Phosphoprotein;Referenceproteome;Repeat	biological regulation;negative regulation of biological process;negative regulation of biosynthetic process;negative regulation of cellular biosynthetic process;negative regulation of cellular macromolecule biosynthetic process;negative regulation of cellular metabolic process;negative regulation of cellular process;negative regulation of gene expression;negative regulation of macromolecule biosy…	adenyl nucleotide binding;adenyl ribonucleotide binding;ATP binding;binding;catalytic activity;DNA binding;helicase activity;hydrolase activity;hydrolase activity, acting on acid anhydrides;hydrolase activity, acting on acid anhydrides, in phosphorus-containing anhydrides;nucleic acid binding;nucleic acid binding transcription factor activity;nucleoside-triphosphatase activity;nucleotide binding;…	cell part;intracellular membrane-bounded organelle;intracellular organelle;intracellular part;membrane-bounded organelle;nucleus;organelle	2	2	2	1	2	2	0	0	2	0	1	1	1.7	206.89	O14981;Q59HB6;B4E0W6	O14981;Q59HB6;B4E0W6	TATA-binding protein-associated factor 172	NaN	18.9214	19.7465	NaN	NaN	18.8697	NaN	NaN	NaN
BTF3	4		3D-structure;Alternativesplicing;Completeproteome;Nucleus;Phosphoprotein;Referenceproteome;Transcription;Transcriptionregulation	biological regulation;biosynthetic process;cellular biosynthetic process;cellular macromolecule biosynthetic process;cellular macromolecule metabolic process;cellular metabolic process;cellular nitrogen compound metabolic process;cellular process;macromolecule biosynthetic process;macromolecule metabolic process;metabolic process;nitrogen compound metabolic process;nucleic acid metabolic process;…	binding;protein binding	cell part;intracellular membrane-bounded organelle;intracellular organelle;intracellular part;membrane-bounded organelle;nucleus;organelle	6	6	6	4	6	4	5	5	5	4	4	4	51	22.168	P20290;P20290-2;D6RDG3;H0Y9Y1	P20290;P20290-2;D6RDG3;H0Y9Y1	Transcription factor BTF3	22.8211	24.8022	22.284	22.1026	24.3486	23.3187	22.4782	25.04	23.5367
BTF3L4	3		Completeproteome;Phosphoprotein;Referenceproteome				6	6	6	4	6	3	2	4	4	4	4	4	55.1	17.27	Q96K17;B3KNJ1;E9PL10	Q96K17;B3KNJ1;E9PL10	Transcription factor BTF3 homolog 4	22.2261	22.1682	20.2752	22.345	22.1352	20.9248	21.9348	22.4958	21.7307
BTK	7	B cell receptor signaling pathway;Fc epsilon RI signaling pathway;Osteoclast differentiation;Primary immunodeficiency	3D-structure;Acetylation;Adaptiveimmunity;Apoptosis;ATP-binding;Cellmembrane;Completeproteome;Cytoplasm;Directproteinsequencing;Diseasemutation;Immunity;Innateimmunity;Kinase;Lipid-binding;Membrane;Metal-binding;Nucleotide-binding;Nucleus;Phosphoprotein;Polymorphism;Referenceproteome;SH2domain;SH3domain;Transcription;Transcriptionregulation;Transferase;Tyrosine-proteinkinase;Zinc;Zinc-finger	activation of immune response;adaptive immune response;anatomical structure development;antigen receptor-mediated signaling pathway;apoptosis;B cell activation;B cell receptor signaling pathway;biological regulation;biosynthetic process;calcium-mediated signaling;cell activation;cell death;cell surface receptor linked signaling pathway;cellular biosynthetic process;cellular macromolecule biosynth…	adenyl nucleotide binding;adenyl ribonucleotide binding;ATP binding;binding;catalytic activity;cation binding;identical protein binding;ion binding;kinase activity;lipid binding;metal ion binding;non-membrane spanning protein tyrosine kinase activity;nucleotide binding;phosphatidylinositol binding;phosphatidylinositol-3,4,5-trisphosphate binding;phospholipid binding;phosphotransferase activity, a…	cell part;cytoplasmic part;cytosol;intracellular membrane-bounded organelle;intracellular organelle;intracellular part;membrane;membrane part;membrane raft;membrane-bounded organelle;nucleus;organelle;plasma membrane	8	8	8	4	6	5	3	3	4	4	4	4	18.2	76.28	Q06187;Q572P5;Q5JY90;H7BY92;Q3MS94;Q3MS95;Q3MS88	Q06187;Q572P5;Q5JY90	Tyrosine-protein kinase BTK	21.7741	20.692	21.5869	20.4204	21.6352	21.792	21.1784	21.5498	21.7449
BUB1B	5	Cell cycle	3D-structure;Acetylation;Alternativesplicing;Apoptosis;ATP-binding;Cellcycle;Celldivision;Centromere;Chromosome;Completeproteome;Cytoplasm;Cytoskeleton;Diseasemutation;Kinase;Kinetochore;Mitosis;Nucleotide-binding;Nucleus;Phosphoprotein;Polymorphism;Referenceproteome;Serine/threonine-proteinkinase;Transferase;Tumorsuppressor;Ublconjugation	anaphase-promoting complex-dependent proteasomal ubiquitin-dependent protein catabolic process;apoptosis;biological regulation;catabolic process;cell cycle checkpoint;cell cycle phase;cell cycle process;cell death;cell division;cell proliferation;cellular catabolic process;cellular component organization;cellular component organization at cellular level;cellular component organization or biogenes…	adenyl nucleotide binding;adenyl ribonucleotide binding;ATP binding;binding;catalytic activity;kinase activity;nucleotide binding;phosphotransferase activity, alcohol group as acceptor;protein binding;protein kinase activity;protein serine/threonine kinase activity;purine nucleotide binding;purine ribonucleoside triphosphate binding;purine ribonucleotide binding;ribonucleotide binding;transferase…	anaphase-promoting complex;cell part;chromosomal part;condensed chromosome outer kinetochore;cullin-RING ubiquitin ligase complex;cytoplasmic part;cytoskeletal part;cytosol;intracellular organelle part;intracellular part;macromolecular complex;microtubule organizing center;nuclear part;nuclear ubiquitin ligase complex;organelle part;perinuclear region of cytoplasm;protein complex;spindle midzone;…	2	2	2	0	1	0	1	2	1	1	2	1	2.1	121.38	O60566-3;O60566;O60566-2;C9JLW5;H3BSN5	O60566-3;O60566;O60566-2;C9JLW5;H3BSN5	Mitotic checkpoint serine/threonine-protein kinase BUB1 beta	NaN	NaN	NaN	NaN	20.2625	NaN	NaN	20.5822	NaN
BUB3	3	Cell cycle;Cell cycle - yeast	Acetylation;ADP-ribosylation;Alternativesplicing;Cellcycle;Celldivision;Centromere;Chromosome;Chromosomepartition;Completeproteome;Isopeptidebond;Kinetochore;Meiosis;Mitosis;Nucleus;Phosphoprotein;Referenceproteome;Repeat;Ublconjugation;WDrepeat	anaphase-promoting complex-dependent proteasomal ubiquitin-dependent protein catabolic process;attachment of spindle microtubules to chromosome;attachment of spindle microtubules to kinetochore;biological regulation;catabolic process;cell cycle checkpoint;cell cycle phase;cell cycle process;cell division;cellular catabolic process;cellular component organization;cellular component organization at…	binding;protein binding	cell part;chromosomal part;condensed chromosome kinetochore;cytoplasmic part;cytosol;intracellular membrane-bounded organelle;intracellular non-membrane-bounded organelle;intracellular organelle;intracellular organelle part;intracellular part;kinetochore;macromolecular complex;membrane-bounded organelle;non-membrane-bounded organelle;nucleus;organelle;organelle part;protein complex	6	6	6	3	5	5	4	2	4	3	3	3	23.5	37.154	O43684;O43684-2;B4DDM6	O43684;O43684-2;B4DDM6	Mitotic checkpoint protein BUB3	22.9001	22.8476	23.0308	23.6936	23.5173	23.0724	23.4651	23.6211	23.2874
BYSL	2		Acetylation;Completeproteome;Cytoplasm;Nucleus;Phosphoprotein;Polymorphism;Referenceproteome;Ribosomebiogenesis	biological adhesion;cell adhesion;cellular component biogenesis;cellular component biogenesis at cellular level;cellular component organization or biogenesis;cellular component organization or biogenesis at cellular level;cellular process;female pregnancy;multi-organism process;reproductive process;ribonucleoprotein complex biogenesis;ribosome biogenesis		cell part;cytoplasm;intracellular non-membrane-bounded organelle;intracellular organelle;intracellular organelle part;intracellular part;non-membrane-bounded organelle;nuclear part;nucleolus;organelle;organelle part	4	4	4	1	2	2	0	4	4	0	2	2	8.7	49.601	Q13895;H7BY94	Q13895;H7BY94	Bystin	NaN	19.5916	19.3694	NaN	20.2791	19.0869	NaN	19.3336	NaN
BZW1	7		Activator;Alternativesplicing;Completeproteome;Directproteinsequencing;Phosphoprotein;Referenceproteome;Transcription;Transcriptionregulation	biological regulation;biosynthetic process;cellular biosynthetic process;cellular macromolecule biosynthetic process;cellular macromolecule metabolic process;cellular metabolic process;cellular nitrogen compound metabolic process;cellular process;macromolecule biosynthetic process;macromolecule metabolic process;metabolic process;nitrogen compound metabolic process;nucleic acid metabolic process;…	binding	cell part;cytoplasm;intracellular part	7	6	6	3	4	6	3	4	4	3	4	3	13.3	51.281	Q7L1Q6-3;Q7L1Q6-4;Q7L1Q6;Q7L1Q6-2;C9IZ80;H0Y503;C9JFN4	Q7L1Q6-3;Q7L1Q6-4;Q7L1Q6;Q7L1Q6-2;C9IZ80	Basic leucine zipper and W2 domain-containing protein 1	22.511	23.2938	23.0016	22.0753	23.165	22.4239	22.0212	23.403	23.5715
BZW2	9		Acetylation;Completeproteome;Developmentalprotein;Differentiation;Neurogenesis;Phosphoprotein;Polymorphism;Referenceproteome	anatomical structure development;cell differentiation;cellular developmental process;cellular macromolecule metabolic process;cellular metabolic process;cellular nitrogen compound metabolic process;cellular process;developmental process;macromolecule metabolic process;metabolic process;nervous system development;nitrogen compound metabolic process;nucleic acid metabolic process;nucleobase-contain…	binding		9	9	8	3	8	8	2	5	6	4	6	6	22.9	48.162	Q9Y6E2;E7ETZ4;B5MCH7;B5MCE7;Q75MG1;E7EMS9;F8WDX8;C9JF98;E9PFD4	Q9Y6E2;E7ETZ4;B5MCH7;B5MCE7	Basic leucine zipper and W2 domain-containing protein 2	21.6913	23.3314	22.5634	20.6802	22.6584	22.3303	22.1637	23.0723	22.5308
C11orf67	8		3D-structure;Alternativesplicing;Completeproteome;Cytoplasm;Polymorphism;Referenceproteome			cell part;cytoplasm;intracellular part	4	4	4	2	2	1	2	1	1	2	2	1	23.2	17.937	E9PR47;E9PNP3;Q9H7C9;E9PIQ4;E9PLK9;Q9H7C9-2;E9PJP1;Q9H7C9-3	E9PR47;E9PNP3;Q9H7C9;E9PIQ4	UPF0366 protein C11orf67	22.1357	18.2704	NaN	NaN	NaN	NaN	20.219	18.337	NaN
C12orf10	4		Acetylation;Completeproteome;Mitochondrion;Nucleus;Polymorphism;Referenceproteome;Transitpeptide	pigmentation		cell part;cytoplasmic part;intracellular membrane-bounded organelle;intracellular organelle;intracellular part;membrane-bounded organelle;mitochondrion;nucleus;organelle	3	3	3	3	3	3	3	3	3	3	3	3	9.6	42.449	Q9HB07;F5H641;F8VQQ3;F8VR84	Q9HB07;F5H641;F8VQQ3;F8VR84	UPF0160 protein MYG1, mitochondrial	22.094	22.4293	22.4533	22.0715	22.4314	22.1434	21.7053	22.4477	22.4164
C12orf23	1		Completeproteome;Glycoprotein;Membrane;Referenceproteome;Transmembrane;Transmembranehelix			cell part;integral to membrane;intrinsic to membrane;membrane part	2	2	2	1	1	1	1	2	1	1	1	1	25.9	11.748	Q8WUH6	Q8WUH6	UPF0444 transmembrane protein C12orf23	19.1525	NaN	NaN	NaN	NaN	NaN	NaN	NaN	NaN
C12orf43	9		Completeproteome;Phosphoprotein;Polymorphism;Referenceproteome				3	3	3	1	2	1	1	2	2	2	3	2	19.4	28.637	F5H7W8;Q96C57;E7ENF1;F6TFQ5;H0YGK4;F5H3K2;G5EA44;F5H8B7;H0YF83	F5H7W8;Q96C57;E7ENF1;F6TFQ5;H0YGK4;F5H3K2;G5EA44;F5H8B7	Uncharacterized protein C12orf43	NaN	19.1662	NaN	NaN	19.8738	19.3446	18.9353	19.7439	19.5003
C14orf159	9		Alternativesplicing;Completeproteome;Mitochondrion;Polymorphism;Referenceproteome;Transitpeptide			cell part;cytoplasmic part;intracellular membrane-bounded organelle;intracellular organelle;intracellular part;membrane-bounded organelle;mitochondrion;organelle	5	5	5	2	1	2	4	2	1	3	1	0	8.5	66.926	Q7Z3D6-2;Q7Z3D6;Q7Z3D6-3;Q7Z3D6-5;G8JLP2;Q7Z3D6-4;H0YB09;H0YB62;H0YB11	Q7Z3D6-2;Q7Z3D6;Q7Z3D6-3;Q7Z3D6-5;G8JLP2;Q7Z3D6-4;H0YB09;H0YB62	UPF0317 protein C14orf159, mitochondrial	NaN	NaN	19.3642	21.9383	19.5067	NaN	20.5908	NaN	NaN
C14orf166	4		Acetylation;Completeproteome;Cytoplasm;Cytoskeleton;Host-virusinteraction;Nucleus;Referenceproteome;Transcription;Transcriptionregulation		binding;identical protein binding;protein binding	cell part;cytoplasmic part;cytoskeletal part;intracellular membrane-bounded organelle;intracellular organelle;intracellular organelle part;intracellular part;macromolecular complex;membrane-bounded organelle;microtubule organizing center;nucleus;organelle;organelle part;perinuclear region of cytoplasm;protein complex;tRNA-splicing ligase complex	8	8	8	6	7	6	7	7	7	5	5	6	41.8	28.068	Q9Y224;G3V4C6;H0YJB9;G3V4E7	Q9Y224;G3V4C6	UPF0568 protein C14orf166	23.377	23.5258	22.6027	23.6632	23.2474	22.9211	23.4081	22.9438	23.0521
C16orf62	9		Alternativesplicing;Completeproteome;Membrane;Phosphoprotein;Polymorphism;Referenceproteome;Transmembrane;Transmembranehelix			cell part;integral to membrane;intrinsic to membrane;membrane part	3	3	3	2	2	3	2	1	1	1	1	2	2.9	118.61	E7EWW0;Q7Z3J2;F5H7K1;G5E9I3;C9J7I2;Q7Z3J2-2;H3BV68;H3BVG8;H3BTI5	E7EWW0;Q7Z3J2;F5H7K1;G5E9I3;C9J7I2;Q7Z3J2-2;H3BV68	UPF0505 protein C16orf62	20.6469	21.9566	20.1646	21.2737	NaN	NaN	NaN	NaN	20.6594
C17orf49;BAP18	6		Chromatinregulator;Completeproteome;DNA-binding;Nucleus;Phosphoprotein;Referenceproteome	cellular component organization;cellular component organization at cellular level;cellular component organization or biogenesis;cellular component organization or biogenesis at cellular level;cellular process;chromatin modification;chromatin organization;chromosome organization;organelle organization	binding;DNA binding;nucleic acid binding	cell part;chromatin remodeling complex;histone methyltransferase complex;intracellular organelle part;intracellular part;ISWI complex;macromolecular complex;methyltransferase complex;MLL1 complex;nuclear part;nucleoplasm part;NURF complex;organelle part;protein complex	4	4	4	3	3	3	4	2	2	4	2	2	38.2	24.767	H0YIS7;C9J4G0;Q8IXM2;Q8IXM2-2;F8W1H0;F8W038	H0YIS7;C9J4G0;Q8IXM2;Q8IXM2-2;F8W1H0;F8W038	Chromatin complexes subunit BAP18	22.2176	21.2675	20.9373	22.4281	21.533	20.656	22.022	21.6711	NaN
C17orf59	1		Completeproteome;Phosphoprotein;Referenceproteome				3	3	3	3	1	2	1	1	3	0	2	2	12.3	37.226	Q96GS4	Q96GS4	Uncharacterized protein C17orf59	20.0243	NaN	19.2571	NaN	NaN	18.6967	NaN	NaN	19.5149
C17orf85	2		Alternativesplicing;Completeproteome;Phosphoprotein;Referenceproteome		binding;nucleotide binding		4	4	4	3	3	2	2	2	2	2	2	3	7.7	70.592	Q53F19;Q53F19-2	Q53F19;Q53F19-2	Uncharacterized protein C17orf85	20.3445	20.3225	19.9406	20.6925	20.3275	19.8324	20.5596	20.3982	20.1094
C19orf10	1		Completeproteome;Directproteinsequencing;Polymorphism;Referenceproteome;Secreted;Signal	activation of signaling protein activity involved in unfolded protein response;biological regulation;positive regulation of catalytic activity;positive regulation of hydrolase activity;positive regulation of kinase activity;positive regulation of molecular function;positive regulation of nuclease activity;positive regulation of protein kinase activity;positive regulation of transferase activity;r…		cell part;cytoplasmic part;endoplasmic reticulum lumen;endoplasmic reticulum part;endoplasmic reticulum-Golgi intermediate compartment;extracellular region;intracellular membrane-bounded organelle;intracellular organelle;intracellular organelle lumen;intracellular organelle part;intracellular part;membrane-bounded organelle;membrane-enclosed lumen;organelle;organelle lumen;organelle part	5	5	5	3	4	4	3	2	4	3	3	4	37	18.795	Q969H8	Q969H8	UPF0556 protein C19orf10	22.1392	22.1379	23.2378	22.459	22.6477	23.2801	22.437	21.5266	23.1722
C19orf43	1		Acetylation;Completeproteome;Phosphoprotein;Referenceproteome				2	2	2	1	2	2	2	2	2	2	2	2	20.5	18.419	Q9BQ61	Q9BQ61	Uncharacterized protein C19orf43	NaN	21.0174	20.6367	20.1444	21.4398	20.1209	21.044	NaN	20.8285
C19orf77	1		Completeproteome;Membrane;Referenceproteome;Signal;Transmembrane;Transmembranehelix			cell part;integral to membrane;intrinsic to membrane;membrane part	2	2	2	2	2	0	2	1	1	2	0	0	15.4	14.964	O75264	O75264	Transmembrane protein C19orf77	NaN	NaN	NaN	NaN	NaN	NaN	19.8154	NaN	NaN
C1orf123	2		Completeproteome;Directproteinsequencing;Referenceproteome				2	2	2	1	1	0	2	1	0	1	0	1	20.6	18.048	Q9NWV4;B1ARP7	Q9NWV4;B1ARP7	UPF0587 protein C1orf123	NaN	NaN	NaN	21.7126	NaN	NaN	NaN	NaN	NaN
C1orf57;NTPCR	2	Purine metabolism;Thiamine metabolism	3D-structure;Acetylation;ATP-binding;Completeproteome;Hydrolase;Nucleotide-binding;Polymorphism;Referenceproteome		adenyl nucleotide binding;adenyl ribonucleotide binding;ATP binding;binding;catalytic activity;hydrolase activity;hydrolase activity, acting on acid anhydrides;hydrolase activity, acting on acid anhydrides, in phosphorus-containing anhydrides;hydrolase activity, acting on ester bonds;nucleoside-triphosphatase activity;nucleotide binding;nucleotide phosphatase activity;phosphatase activity;phospho…		4	4	4	4	4	2	3	3	3	0	0	0	24.6	25.072	Q5TDF0;Q9BSD7	Q5TDF0;Q9BSD7	Cancer-related nucleoside-triphosphatase	21.744	20.8344	NaN	NaN	21.3835	20.9882	NaN	NaN	NaN
[truncated: 2,647 more rows]

## Sheet: ident Peptides
Sequence	Length	Missed cleavages	Mass	Proteins	Leading razor protein	Gene names	Protein names	Unique (Groups)	Unique (Proteins)	Charges	PEP	Score	Experiment 17d0A	Experiment 17d0B	Experiment 17d3	Experiment 17d7-1	Experiment 17d7-2	Experiment 1d0	Experiment 1d3	Experiment 1d7	Experiment 2d0	Experiment 2d3	Experiment 2d7	Intensity	Intensity 17d0A	Intensity 17d0B	Intensity 17d3	Intensity 17d7-1	Intensity 17d7-2	Intensity 1d0	Intensity 1d3	Intensity 1d7	Intensity 2d0	Intensity 2d3	Intensity 2d7	Reverse	Contaminant	id	Protein group IDs	Mod. peptide IDs	Evidence IDs	MS/MS IDs	Best MS/MS	Oxidation (M) site IDs
[truncated: 22,130 more rows]

[truncated: 4 more sheets: Oxidation(M) Sites, quant Proteins, Foldchanges, Parameter]
